# Supplementary material for: Transcriptomic Analysis Provides Insight into the ROS Scavenging System and Regulatory Mechanisms in Atriplex canescens Response to Salinity
Source: MDPI journal article supplement (doi:10.3390/ijms24010242), 2022-12-23
Supplement: s1 [file s1]

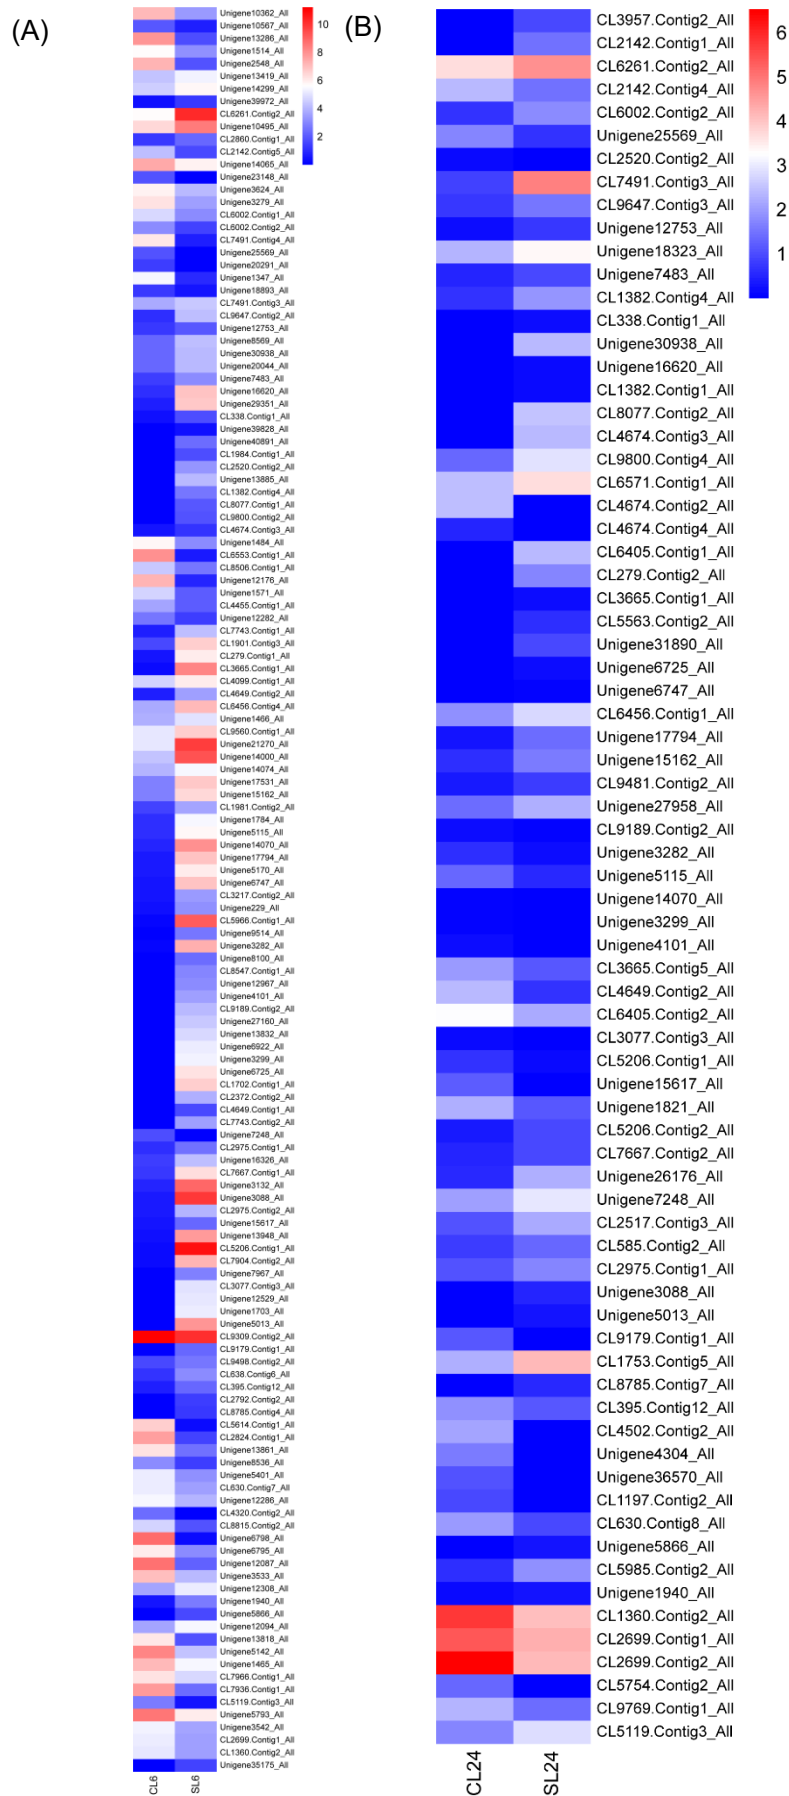

**Figure S1.** All the DEGs related to the ROS-scavenging system in leaves at (A) 6 h and (B) 24 h under 100 mM NaCl treatment.

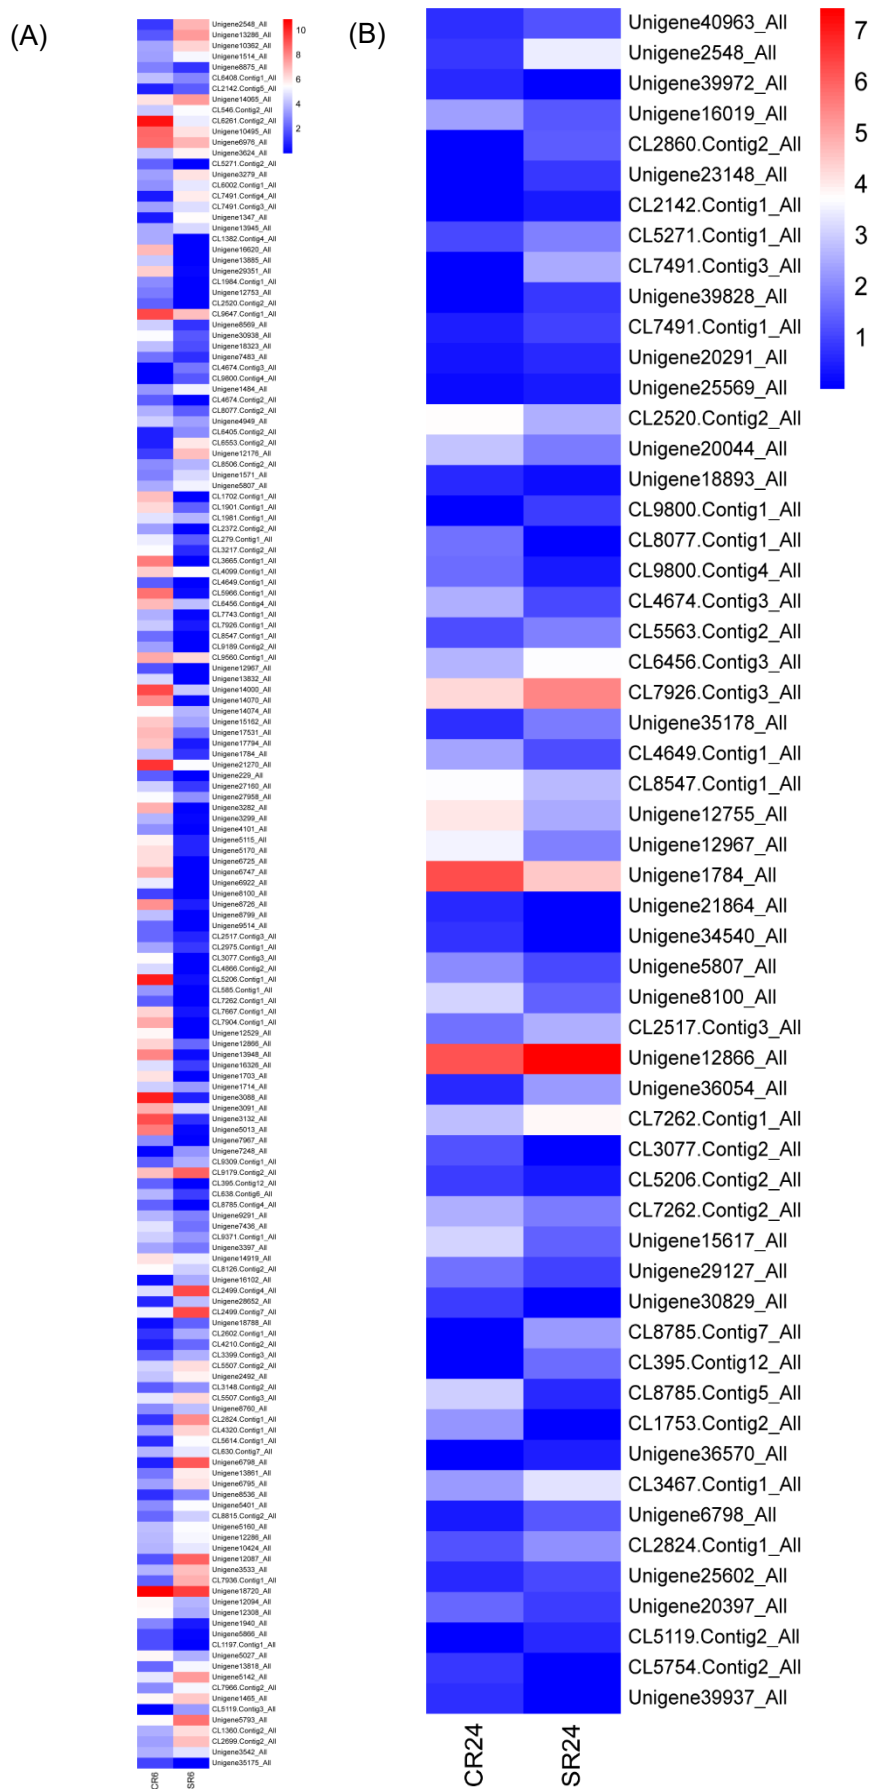

**Figure S2.** All the DEGs related to the ROS-scavenging system in roots at (A)6 h and (B)24 h under 100 mM NaCl treatment.

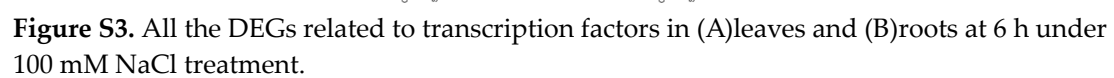

**Figure S3.** All the DEGs related to transcription factors in (A)leaves and (B)roots at 6 h under 100 mM NaCl treatment.

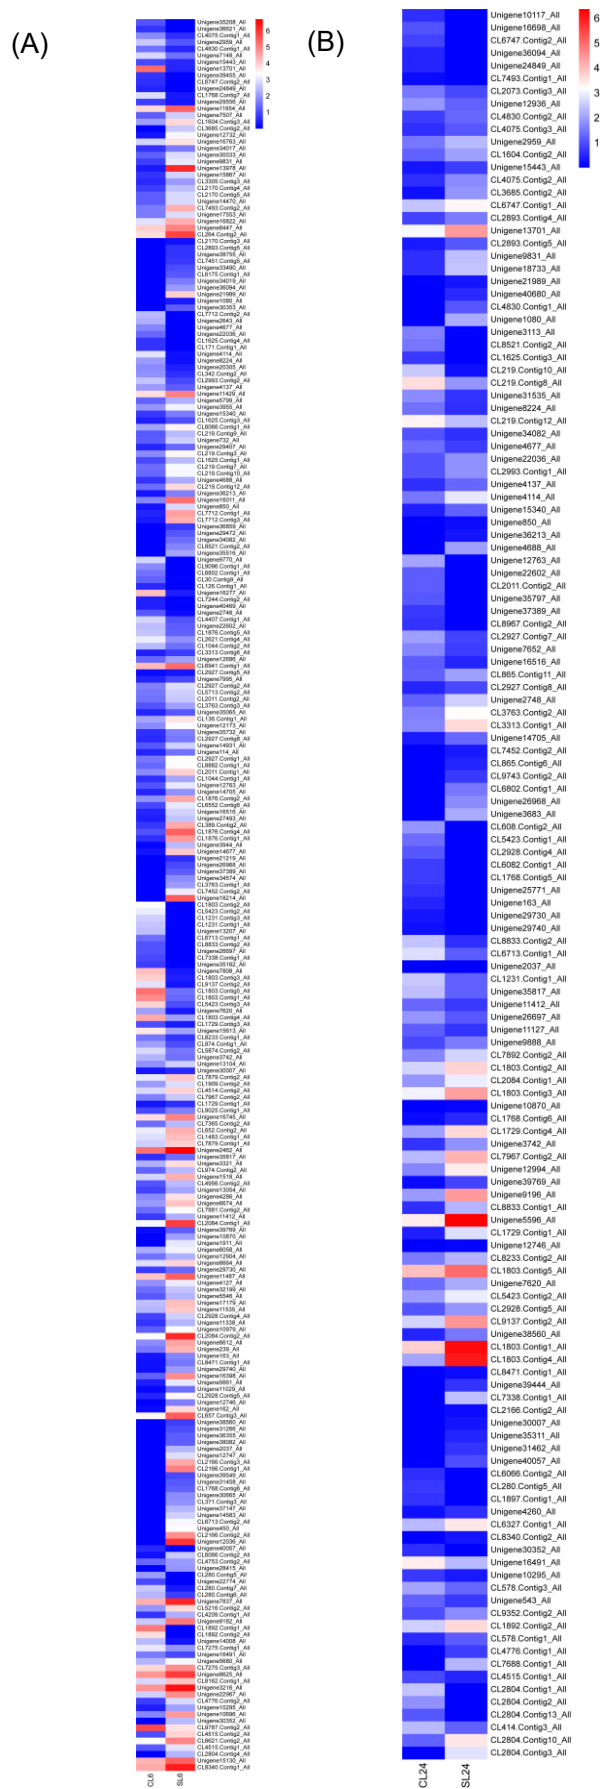

**Figure S4.** All the DEGs related to protein kinases in leaves at (A)6 h and (B)24 h under 100 mM NaCl treatment.

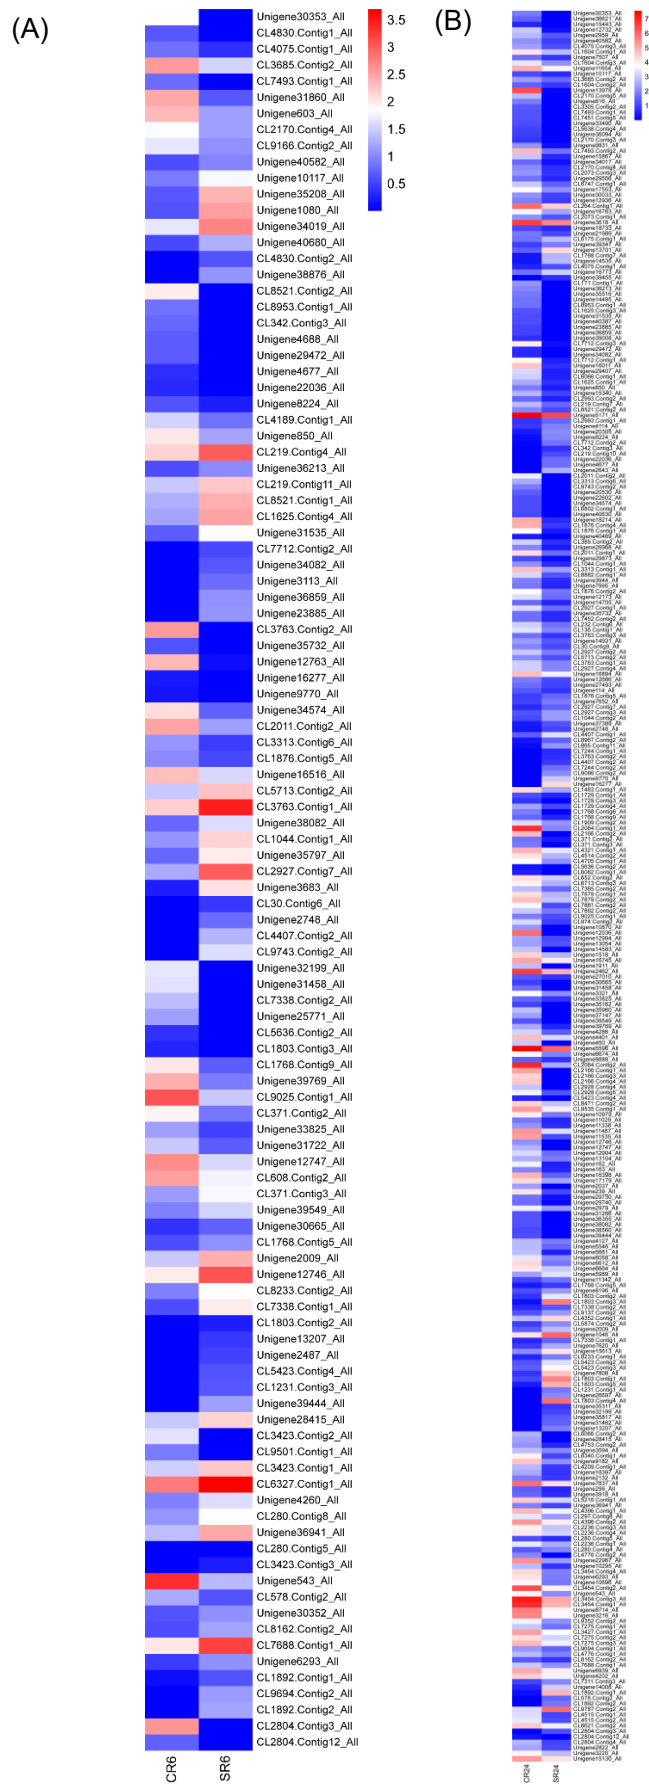

**Figure S5.** All the DEGs related to protein kinases in roots at (A)6 h and (B)24 h under 100 mM NaCl treatment.

**Table S1.** The GO enrichment of differentially expressed genes in CL6\_vs\_SL6.

| GO_accession | Description                                          | Ontology | Gene Number |
|--------------|------------------------------------------------------|----------|-------------|
| GO:0050896   | response to stimulus                                 | BP       | 340         |
| GO:0055114   | oxidation-reduction process                          | BP       | 297         |
| GO:0006082   | organic acid metabolic process                       | BP       | 162         |
| GO:0043436   | oxoacid metabolic process                            | BP       | 162         |
| GO:0019752   | carboxylic acid metabolic process                    | BP       | 155         |
| GO:0005975   | carbohydrate metabolic process                       | BP       | 142         |
| GO:0006629   | lipid metabolic process                              | BP       | 125         |
| GO:0042221   | response to chemical                                 | BP       | 125         |
| GO:0006520   | cellular amino acid metabolic process                | BP       | 89          |
| GO:1901605   | alpha-amino acid metabolic process                   | BP       | 59          |
| GO:1901700   | response to oxygen-containing compound               | BP       | 56          |
| GO:0006979   | response to oxidative stress                         | BP       | 34          |
| GO:0001101   | response to acid chemical                            | BP       | 33          |
| GO:0006073   | cellular glucan metabolic process                    | BP       | 31          |
| GO:0044042   | glucan metabolic process                             | BP       | 31          |
| GO:0016020   | membrane                                             | CC       | 604         |
| GO:0044425   | membrane part                                        | CC       | 308         |
| GO:0031224   | intrinsic component of membrane                      | CC       | 269         |
| GO:0016021   | integral component of membrane                       | CC       | 262         |
| GO:0009536   | plastid                                              | CC       | 216         |
| GO:0009507   | chloroplast                                          | CC       | 208         |
| GO:0044434   | chloroplast part                                     | CC       | 101         |
| GO:0044435   | plastid part                                         | CC       | 101         |
| GO:0031984   | organelle subcompartment                             | CC       | 73          |
| GO:0009579   | thylakoid                                            | CC       | 72          |
| GO:0005576   | extracellular region                                 | CC       | 66          |
| GO:0044436   | thylakoid part                                       | CC       | 63          |
| GO:0034357   | photosynthetic membrane                              | CC       | 56          |
| GO:0009534   | chloroplast thylakoid                                | CC       | 52          |
| GO:0031976   | plastid thylakoid                                    | CC       | 52          |
| GO:0003824   | catalytic activity                                   | MF       | 1635        |
| GO:0016740   | transferase activity                                 | MF       | 638         |
| GO:0016491   | oxidoreductase activity                              | MF       | 393         |
| GO:0048037   | cofactor binding                                     | MF       | 195         |
| GO:0016757   | transferase activity, transferring glycosyl groups   | MF       | 122         |
| GO:0050662   | coenzyme binding                                     | MF       | 122         |
| GO:0016798   | hydrolase activity, acting on glycosyl bonds         | MF       | 80          |
| GO:0016758   | transferase activity, transferring hexosyl groups    | MF       | 72          |
| GO:0016829   | lyase activity                                       | MF       | 69          |
| GO:0004553   | hydrolase activity, hydrolyzing O-glycosyl compounds | MF       | 68          |
| GO:0016705   | oxidoreductase activity, acting on paired donors,    | MF       | 58          |

|                                                     |                      |    |    |
|-----------------------------------------------------|----------------------|----|----|
| with incorporation or reduction of molecular oxygen |                      |    |    |
| GO:0046906                                          | tetrapyrrole binding | MF | 53 |
| GO:0005506                                          | iron ion binding     | MF | 52 |
| GO:0020037                                          | heme binding         | MF | 50 |
| GO:0019842                                          | vitamin binding      | MF | 47 |

**Table S2.** The GO enrichment of differentially expressed genes in CR6\_vs\_SR6.

| GO_accession | Description                                        | Ontology | fg   |
|--------------|----------------------------------------------------|----------|------|
| GO:0005975   | carbohydrate metabolic process                     | BP       | 155  |
| GO:0009628   | response to abiotic stimulus                       | BP       | 102  |
| GO:1901700   | response to oxygen-containing compound             | BP       | 58   |
| GO:1901605   | alpha-amino acid metabolic process                 | BP       | 55   |
| GO:0005976   | polysaccharide metabolic process                   | BP       | 45   |
| GO:0009266   | response to temperature stimulus                   | BP       | 40   |
| GO:0044264   | cellular polysaccharide metabolic process          | BP       | 39   |
| GO:0006979   | response to oxidative stress                       | BP       | 37   |
| GO:0006325   | chromatin organization                             | BP       | 35   |
| GO:0006073   | cellular glucan metabolic process                  | BP       | 34   |
| GO:0044042   | glucan metabolic process                           | BP       | 34   |
| GO:0006720   | isoprenoid metabolic process                       | BP       | 29   |
| GO:0016311   | dephosphorylation                                  | BP       | 29   |
| GO:0008299   | isoprenoid biosynthetic process                    | BP       | 28   |
| GO:0000271   | polysaccharide biosynthetic process                | BP       | 27   |
| GO:0016020   | membrane                                           | CC       | 659  |
| GO:0031224   | intrinsic component of membrane                    | CC       | 292  |
| GO:0016021   | integral component of membrane                     | CC       | 285  |
| GO:0009536   | plastid                                            | CC       | 224  |
| GO:0009507   | chloroplast                                        | CC       | 214  |
| GO:0044434   | chloroplast part                                   | CC       | 96   |
| GO:0031984   | organelle subcompartment                           | CC       | 82   |
| GO:0009579   | thylakoid                                          | CC       | 78   |
| GO:0005576   | extracellular region                               | CC       | 70   |
| GO:0044436   | thylakoid part                                     | CC       | 69   |
| GO:0034357   | photosynthetic membrane                            | CC       | 63   |
| GO:0009534   | chloroplast thylakoid                              | CC       | 58   |
| GO:0031976   | plastid thylakoid                                  | CC       | 58   |
| GO:0042651   | thylakoid membrane                                 | CC       | 53   |
| GO:0005618   | cell wall                                          | CC       | 48   |
| GO:0003824   | catalytic activity                                 | MF       | 1706 |
| GO:0016491   | oxidoreductase activity                            | MF       | 396  |
| GO:0048037   | cofactor binding                                   | MF       | 193  |
| GO:0016757   | transferase activity, transferring glycosyl groups | MF       | 122  |
| GO:0050662   | coenzyme binding                                   | MF       | 119  |
| GO:0016798   | hydrolase activity, acting on glycosyl bonds       | MF       | 85   |

|            |                                                                                                       |    |    |
|------------|-------------------------------------------------------------------------------------------------------|----|----|
| GO:0004553 | hydrolase activity, hydrolyzing O-glycosyl compounds                                                  | MF | 72 |
| GO:0016758 | transferase activity, transferring hexosyl groups                                                     | MF | 72 |
| GO:0016829 | lyase activity                                                                                        | MF | 66 |
| GO:0016705 | oxidoreductase activity, acting on paired donors, with incorporation or reduction of molecular oxygen | MF | 60 |
| GO:0046906 | tetrapyrrole binding                                                                                  | MF | 55 |
| GO:0020037 | heme binding                                                                                          | MF | 50 |
| GO:0019843 | rRNA binding                                                                                          | MF | 28 |
| GO:0016209 | antioxidant activity                                                                                  | MF | 27 |
| GO:0004601 | peroxidase activity                                                                                   | MF | 25 |

**Table S3.** The KEGG pathway enrichment of differentially expressed genes in CL6\_vs\_SL6.

| PathwayID | PathwayName                                           | Gene Number | Pvalue      | Qvalue      |
|-----------|-------------------------------------------------------|-------------|-------------|-------------|
| ko00940   | Phenylpropanoid biosynthesis                          | 230         | 3.95E-09    | 1.38E-06    |
| ko00945   | Stilbenoid, diarylheptanoid and gingerol biosynthesis | 103         | 9.17E-07    | 0.00016052  |
| ko00860   | Porphyrin and chlorophyll metabolism                  | 94          | 1.60E-05    | 0.001477621 |
| ko04075   | Plant hormone signal transduction                     | 276         | 1.69E-05    | 0.001477621 |
| ko00710   | Carbon fixation in photosynthetic organisms           | 110         | 6.17E-05    | 0.003599562 |
| ko00941   | Flavonoid biosynthesis                                | 104         | 0.000264463 | 0.011570274 |
| ko00906   | Carotenoid biosynthesis                               | 51          | 0.000807044 | 0.025678658 |
| ko01200   | Carbon metabolism                                     | 261         | 0.001028398 | 0.029994928 |
| ko00500   | Starch and sucrose metabolism                         | 274         | 0.001686271 | 0.042156768 |
| ko00196   | Photosynthesis - antenna proteins                     | 26          | 0.002163035 | 0.050470827 |
| ko00903   | Limonene and pinene degradation                       | 58          | 0.003684214 | 0.075851459 |
| ko00480   | Glutathione metabolism                                | 80          | 0.004557604 | 0.088620081 |
| ko04712   | Circadian rhythm - plant                              | 99          | 0.005864397 | 0.108028372 |
| ko00195   | Photosynthesis                                        | 67          | 0.009469331 | 0.157822179 |
| ko00511   | Other glycan degradation                              | 83          | 0.013951401 | 0.221954106 |
| ko00900   | Terpenoid backbone biosynthesis                       | 63          | 0.018697463 | 0.272671329 |
| ko00030   | Pentose phosphate pathway                             | 85          | 0.021849277 | 0.298529488 |
| ko00073   | Cutin, suberine and wax biosynthesis                  | 52          | 0.025200117 | 0.298529488 |
| ko00620   | Pyruvate metabolism                                   | 92          | 0.025290438 | 0.298529488 |
| ko00051   | Fructose and mannose metabolism                       | 77          | 0.025588242 | 0.298529488 |
| ko00908   | Zeatin biosynthesis                                   | 39          | 0.033570703 | 0.356052913 |
| ko00564   | Glycerophospholipid metabolism                        | 105         | 0.035805157 | 0.368582494 |
| ko00052   | Galactose metabolism                                  | 92          | 0.040431366 | 0.393082723 |
| ko00010   | Glycolysis / Gluconeogenesis                          | 132         | 0.046668281 | 0.441456716 |
| ko00350   | Tyrosine metabolism                                   | 56          | 0.051016786 | 0.464955361 |
| ko00590   | Arachidonic acid metabolism                           | 22          | 0.063531515 | 0.517116982 |
| ko00592   | alpha-Linolenic acid metabolism                       | 57          | 0.075169347 | 0.571940681 |
| ko00905   | Brassinosteroid biosynthesis                          | 15          | 0.100776372 | 0.678302507 |



|         |                               |    |             |             |
|---------|-------------------------------|----|-------------|-------------|
| ko00942 | Anthocyanin biosynthesis      | 17 | 0.103352623 | 0.682517324 |
| ko00562 | Inositol phosphate metabolism | 79 | 0.112710229 | 0.704438931 |

**Table S4.** The KEGG pathway enrichment of differentially expressed genes in CR6\_vs\_SR6.

| PathwayID | PathwayName                                           | Gene Number | Pvalue      | Qvalue      |
|-----------|-------------------------------------------------------|-------------|-------------|-------------|
| ko00940   | Phenylpropanoid biosynthesis                          | 229         | 1.72E-06    | 0.00059873  |
| ko00860   | Porphyrin and chlorophyll metabolism                  | 98          | 5.89E-05    | 0.007820286 |
| ko00945   | Stilbenoid, diarylheptanoid and gingerol biosynthesis | 100         | 6.74E-05    | 0.007820286 |
| ko04075   | Plant hormone signal transduction                     | 274         | 0.002466794 | 0.12283654  |
| ko00906   | Carotenoid biosynthesis                               | 52          | 0.002654937 | 0.12283654  |
| ko00710   | Carbon fixation in photosynthetic organisms           | 106         | 0.002886418 | 0.12283654  |
| ko00196   | Photosynthesis - antenna proteins                     | 27          | 0.003529786 | 0.12283654  |
| ko00941   | Flavonoid biosynthesis                                | 102         | 0.005144792 | 0.162762495 |
| ko00480   | Glutathione metabolism                                | 85          | 0.007302515 | 0.211772933 |
| ko00500   | Starch and sucrose metabolism                         | 287         | 0.009379824 | 0.222213807 |
| ko00195   | Photosynthesis                                        | 72          | 0.011343157 | 0.246713668 |
| ko00908   | Zeatin biosynthesis                                   | 45          | 0.014097839 | 0.288591065 |
| ko00052   | Galactose metabolism                                  | 105         | 0.015247098 | 0.294777224 |
| ko00592   | alpha-Linolenic acid metabolism                       | 68          | 0.018431396 | 0.337585566 |
| ko04712   | Circadian rhythm - plant                              | 102         | 0.020181192 | 0.341488187 |
| ko00900   | Terpenoid backbone biosynthesis                       | 68          | 0.020607046 | 0.341488187 |
| ko00564   | Glycerophospholipid metabolism                        | 117         | 0.021802754 | 0.344879931 |
| ko00511   | Other glycan degradation                              | 86          | 0.035052676 | 0.469166584 |
| ko00350   | Tyrosine metabolism                                   | 62          | 0.039102834 | 0.503992089 |
| ko00360   | Phenylalanine metabolism                              | 55          | 0.050588085 | 0.535741933 |
| ko01200   | Carbon metabolism                                     | 256         | 0.055756896 | 0.554382849 |
| ko00073   | Cutin, suberine and wax biosynthesis                  | 52          | 0.076172257 | 0.602453309 |
| ko00903   | Limonene and pinene degradation                       | 52          | 0.076172257 | 0.602453309 |
| ko00750   | Vitamin B6 metabolism                                 | 20          | 0.0801563   | 0.603903147 |
| ko00740   | Riboflavin metabolism                                 | 20          | 0.0801563   | 0.603903147 |
| ko00590   | Arachidonic acid metabolism                           | 23          | 0.084066824 | 0.603903147 |
| ko00950   | Isoquinoline alkaloid biosynthesis                    | 44          | 0.08503234  | 0.603903147 |
| ko00030   | Pentose phosphate pathway                             | 85          | 0.091519952 | 0.618508588 |
| ko00010   | Glycolysis / Gluconeogenesis                          | 139         | 0.093297084 | 0.618508588 |
| ko00770   | Pantothenate and CoA biosynthesis                     | 43          | 0.097680617 | 0.618508588 |

**Table S5.** The GO enrichment of differentially expressed genes in CL24\_vs\_SL24.

| GO_accession | Description                                                     | Ontology | Gene Number |
|--------------|-----------------------------------------------------------------|----------|-------------|
| GO:0050896   | response to stimulus                                            | BP       | 84          |
| GO:0006796   | phosphate-containing compound metabolic process                 | BP       | 73          |
| GO:0006793   | phosphorus metabolic process                                    | BP       | 73          |
| GO:0043412   | macromolecule modification                                      | BP       | 64          |
| GO:0065007   | biological regulation                                           | BP       | 62          |
| GO:0016310   | phosphorylation                                                 | BP       | 59          |
| GO:0050789   | regulation of biological process                                | BP       | 56          |
| GO:0006464   | cellular protein modification process                           | BP       | 55          |
| GO:0036211   | protein modification process                                    | BP       | 55          |
| GO:0050794   | regulation of cellular process                                  | BP       | 54          |
| GO:0051716   | cellular response to stimulus                                   | BP       | 44          |
| GO:0006468   | protein phosphorylation                                         | BP       | 43          |
| GO:0007154   | cell communication                                              | BP       | 42          |
| GO:0007165   | signal transduction                                             | BP       | 38          |
| GO:0023052   | signaling                                                       | BP       | 38          |
| GO:0016020   | membrane                                                        | CC       | 113         |
| GO:0044425   | membrane part                                                   | CC       | 68          |
| GO:0016021   | integral component of membrane                                  | CC       | 61          |
| GO:0031224   | intrinsic component of membrane                                 | CC       | 61          |
| GO:0012505   | endomembrane system                                             | CC       | 22          |
| GO:0005794   | Golgi apparatus                                                 | CC       | 11          |
| GO:0098791   | Golgi subcompartment                                            | CC       | 8           |
| GO:0044431   | Golgi apparatus part                                            | CC       | 8           |
| GO:0000139   | Golgi membrane                                                  | CC       | 7           |
| GO:0016604   | nuclear body                                                    | CC       | 6           |
| GO:0000786   | nucleosome                                                      | CC       | 4           |
| GO:0032993   | protein-DNA complex                                             | CC       | 4           |
| GO:0044815   | DNA packaging complex                                           | CC       | 4           |
| GO:0009514   | glyoxysome                                                      | CC       | 3           |
| GO:0031985   | Golgi cisterna                                                  | CC       | 3           |
| GO:0016740   | transferase activity                                            | MF       | 146         |
| GO:0016772   | transferase activity, transferring phosphorus-containing groups | MF       | 79          |
| GO:0008144   | drug binding                                                    | MF       | 79          |
| GO:0016301   | kinase activity                                                 | MF       | 69          |
| GO:0016773   | phosphotransferase activity, alcohol group as acceptor          | MF       | 66          |
| GO:0004672   | protein kinase activity                                         | MF       | 56          |
| GO:0004674   | protein serine/threonine kinase activity                        | MF       | 37          |
| GO:0016758   | transferase activity, transferring hexosyl groups               | MF       | 19          |
| GO:0005509   | calcium ion binding                                             | MF       | 15          |
| GO:0046983   | protein dimerization activity                                   | MF       | 11          |
| GO:0046527   | glucosyltransferase activity                                    | MF       | 10          |

|            |                                                         |    |   |
|------------|---------------------------------------------------------|----|---|
| GO:0008194 | UDP-glycosyltransferase activity                        | MF | 9 |
| GO:0004601 | peroxidase activity                                     | MF | 8 |
| GO:0016684 | oxidoreductase activity, acting on peroxide as acceptor | MF | 8 |
| GO:0016209 | antioxidant activity                                    | MF | 8 |

**Table S6.** The GO enrichment of differentially expressed genes in CR24\_vs\_SR24.

| GO_accession | Description                                     | Ontology | Gene Number |
|--------------|-------------------------------------------------|----------|-------------|
| GO:0008152   | metabolic process                               | BP       | 288         |
| GO:0009987   | cellular process                                | BP       | 247         |
| GO:0044237   | cellular metabolic process                      | BP       | 224         |
| GO:0071704   | organic substance metabolic process             | BP       | 214         |
| GO:0044238   | primary metabolic process                       | BP       | 201         |
| GO:0006807   | nitrogen compound metabolic process             | BP       | 174         |
| GO:0043170   | macromolecule metabolic process                 | BP       | 147         |
| GO:0009058   | biosynthetic process                            | BP       | 141         |
| GO:1901564   | organonitrogen compound metabolic process       | BP       | 140         |
| GO:0034641   | cellular nitrogen compound metabolic process    | BP       | 136         |
| GO:0044260   | cellular macromolecule metabolic process        | BP       | 135         |
| GO:1901576   | organic substance biosynthetic process          | BP       | 133         |
| GO:0044249   | cellular biosynthetic process                   | BP       | 131         |
| GO:0044271   | cellular nitrogen compound biosynthetic process | BP       | 112         |
| GO:0019538   | protein metabolic process                       | BP       | 109         |
| GO:0005622   | intracellular                                   | CC       | 188         |
| GO:0044424   | intracellular part                              | CC       | 183         |
| GO:0043229   | intracellular organelle                         | CC       | 156         |
| GO:0043226   | organelle                                       | CC       | 156         |
| GO:0005737   | cytoplasm                                       | CC       | 152         |
| GO:0044444   | cytoplasmic part                                | CC       | 131         |
| GO:0032991   | protein-containing complex                      | CC       | 96          |
| GO:0043228   | non-membrane-bounded organelle                  | CC       | 78          |
| GO:0043232   | intracellular non-membrane-bounded organelle    | CC       | 78          |
| GO:0005840   | ribosome                                        | CC       | 73          |
| GO:1990904   | ribonucleoprotein complex                       | CC       | 73          |
| GO:0009534   | chloroplast thylakoid                           | CC       | 13          |
| GO:0031976   | plastid thylakoid                               | CC       | 13          |
| GO:0044391   | ribosomal subunit                               | CC       | 13          |
| GO:0009521   | photosystem                                     | CC       | 7           |
| GO:0005198   | structural molecule activity                    | MF       | 68          |
| GO:0003735   | structural constituent of ribosome              | MF       | 67          |
| GO:0016829   | lyase activity                                  | MF       | 19          |
| GO:0016830   | carbon-carbon lyase activity                    | MF       | 12          |
| GO:0016407   | acetyltransferase activity                      | MF       | 7           |
| GO:0008374   | O-acyltransferase activity                      | MF       | 6           |
| GO:0004527   | exonuclease activity                            | MF       | 5           |

|            |                                              |    |   |
|------------|----------------------------------------------|----|---|
| GO:0016833 | oxo-acid-lyase activity                      | MF | 4 |
| GO:0038023 | signaling receptor activity                  | MF | 4 |
| GO:0003993 | acid phosphatase activity                    | MF | 4 |
| GO:0009001 | serine O-acetyltransferase activity          | MF | 3 |
| GO:0016412 | serine O-acyltransferase activity            | MF | 3 |
| GO:0016413 | O-acetyltransferase activity                 | MF | 3 |
| GO:0003913 | DNA photolyase activity                      | MF | 3 |
| GO:0052716 | hydroquinone: oxygen oxidoreductase activity | MF | 3 |

**Table S7. The KEGG pathway enrichment of differentially expressed genes in CL24\_vs\_SL24.**

| PathwayID | PathwayName                                   | Gene Number | Pvalue      | Qvalue      |
|-----------|-----------------------------------------------|-------------|-------------|-------------|
| ko00531   | Glycosaminoglycan degradation                 | 21          | 0.000164426 | 0.051133044 |
| ko04146   | Peroxisome                                    | 34          | 0.001437022 | 0.152324343 |
| ko00564   | Glycerophospholipid metabolism                | 32          | 0.002625411 | 0.166976156 |
| ko00603   | Glycosphingolipid biosynthesis - globo series | 8           | 0.006016992 | 0.218958538 |
| ko00590   | Arachidonic acid metabolism                   | 9           | 0.00619694  | 0.218958538 |
| ko00650   | Butanoate metabolism                          | 13          | 0.007416156 | 0.235833762 |
| ko00860   | Porphyrin and chlorophyll metabolism          | 21          | 0.00923778  | 0.267055825 |
| ko00072   | Synthesis and degradation of ketone bodies    | 5           | 0.010962875 | 0.272046292 |
| ko00280   | Valine, leucine and isoleucine degradation    | 20          | 0.011257365 | 0.272046292 |
| ko02010   | ABC transporters                              | 33          | 0.020723831 | 0.346851484 |
| ko00941   | Flavonoid biosynthesis                        | 23          | 0.025955724 | 0.375178194 |
| ko00770   | Pantothenate and CoA biosynthesis             | 12          | 0.039592307 | 0.490763338 |
| ko00592   | alpha-Linolenic acid metabolism               | 16          | 0.04125537  | 0.490763338 |
| ko04120   | Ubiquitin mediated proteolysis                | 33          | 0.041668585 | 0.490763338 |
| ko00290   | Valine, leucine and isoleucine biosynthesis   | 9           | 0.050039906 | 0.548175635 |
| ko00730   | Thiamine metabolism                           | 5           | 0.052830815 | 0.548175635 |
| ko00740   | Riboflavin metabolism                         | 6           | 0.053438505 | 0.548175635 |
| ko00600   | Sphingolipid metabolism                       | 18          | 0.073476743 | 0.589639076 |
| ko04070   | Phosphatidylinositol signaling system         | 21          | 0.074134341 | 0.589639076 |
| ko00660   | C5-Branched dibasic acid metabolism           | 5           | 0.081304707 | 0.601276674 |
| ko00360   | Phenylalanine metabolism                      | 12          | 0.125890338 | 0.835122115 |
| ko03040   | Spliceosome                                   | 69          | 0.131308509 | 0.835122115 |
| ko00790   | Folate biosynthesis                           | 6           | 0.140929931 | 0.87873957  |
| ko00561   | Glycerolipid metabolism                       | 18          | 0.153088089 | 0.901518744 |
| ko04144   | Endocytosis                                   | 57          | 0.165427637 | 0.923416099 |
| ko00510   | N-Glycan biosynthesis                         | 11          | 0.16551798  | 0.923416099 |
| ko00903   | Limonene and pinene degradation               | 11          | 0.178830864 | 0.948526836 |
| ko00440   | Phosphonate and phosphinate metabolism        | 3           | 0.17890257  | 0.948526836 |

|         |                                                     |    |             |             |
|---------|-----------------------------------------------------|----|-------------|-------------|
| ko00400 | Phenylalanine, tyrosine and tryptophan biosynthesis | 12 | 0.178967328 | 0.948526836 |
| ko00591 | Linoleic acid metabolism                            | 6  | 0.200090363 | 0.999979679 |

**Table S8.** The KEGG pathway enrichment of differentially expressed genes in CR24\_vs\_SR24.

| PathwayID | PathwayName                                           | Gene number | Pvalue      | Qvalue      |
|-----------|-------------------------------------------------------|-------------|-------------|-------------|
| ko03010   | Ribosome                                              | 91          | 9.34E-14    | 2.89E-11    |
| ko00196   | Photosynthesis - antenna proteins                     | 14          | 2.72E-08    | 4.22E-06    |
| ko00860   | Porphyrin and chlorophyll metabolism                  | 18          | 0.001431581 | 0.11094751  |
| ko00195   | Photosynthesis                                        | 16          | 0.002055616 | 0.11694497  |
| ko00450   | Selenocompound metabolism                             | 9           | 0.003878925 | 0.171780984 |
| ko00710   | Carbon fixation in photosynthetic organisms           | 19          | 0.007640534 | 0.263173938 |
| ko00770   | Pantothenate and CoA biosynthesis                     | 10          | 0.016925359 | 0.476987396 |
| ko00590   | Arachidonic acid metabolism                           | 6           | 0.022188225 | 0.555205424 |
| ko03060   | Protein export                                        | 12          | 0.023425012 | 0.555205424 |
| ko03015   | mRNA surveillance pathway                             | 36          | 0.033693407 | 0.555205424 |
| ko03013   | RNA transport                                         | 57          | 0.034145873 | 0.555205424 |
| ko00790   | Folate biosynthesis                                   | 6           | 0.034263224 | 0.555205424 |
| ko00740   | Riboflavin metabolism                                 | 5           | 0.035545105 | 0.555205424 |
| ko00941   | Flavonoid biosynthesis                                | 16          | 0.042452455 | 0.598193679 |
| ko02010   | ABC transporters                                      | 22          | 0.052630773 | 0.674419634 |
| ko00072   | Synthesis and degradation of ketone bodies            | 3           | 0.05438868  | 0.674419634 |
| ko04120   | Ubiquitin mediated proteolysis                        | 23          | 0.056660284 | 0.675564928 |
| ko03450   | Non-homologous end-joining                            | 3           | 0.069798124 | 0.763352093 |
| ko00511   | Other glycan degradation                              | 14          | 0.069800327 | 0.763352093 |
| ko00510   | N-Glycan biosynthesis                                 | 9           | 0.08730129  | 0.795982348 |
| ko00940   | Phenylpropanoid biosynthesis                          | 27          | 0.093227    | 0.825724853 |
| ko04122   | Sulfur relay system                                   | 4           | 0.103201471 | 0.864660975 |
| ko00970   | Aminoacyl-tRNA biosynthesis                           | 16          | 0.12524438  | 0.975200337 |
| ko00600   | Sphingolipid metabolism                               | 12          | 0.128030482 | 0.975200337 |
| ko04070   | Phosphatidylinositol signaling system                 | 14          | 0.128978109 | 0.975200337 |
| ko04146   | Peroxisome                                            | 17          | 0.144332013 | 0.991463594 |
| ko01210   | 2-Oxocarboxylic acid metabolism                       | 15          | 0.16122143  | 0.997976318 |
| ko00760   | Nicotinate and nicotinamide metabolism                | 6           | 0.176157809 | 0.997976318 |
| ko00562   | Inositol phosphate metabolism                         | 13          | 0.176613206 | 0.997976318 |
| ko00945   | Stilbenoid, diarylheptanoid and gingerol biosynthesis | 11          | 0.184525917 | 0.997976318 |

**Table S9.** Differentially expressed genes (DEGs) related to enzymatic antioxidant defense systems in leaves of *A. canescens* after 100 mM NaCl treatment for 6 h. FPKM-CL6 and FPKM-SL6 respectively indicates the FPKM value of a gene in leaves under control condition for 6 h and salt treatment for 6 h. Fold change equals to  $\log_2$  (FPKM-SL6 / FPKM-CL6). Protein refer to the protein encoded by each DEGs.

| Gene ID | FPKM-CL6 | FPKM-SL6 | Fold change | Homologous species |
|---------|----------|----------|-------------|--------------------|
|---------|----------|----------|-------------|--------------------|

|                    |        |         |       |                                           |
|--------------------|--------|---------|-------|-------------------------------------------|
| <b>GLR</b>         |        |         |       |                                           |
| Unigene10362_All   | 138.82 | 9.94    | -3.80 | <i>Prunus mume</i>                        |
| Unigene10567_All   | 2.88   | 0.67    | -2.10 | <i>Rheum australe</i>                     |
| Unigene13286_All   | 244.75 | 2.43    | -6.65 | <i>Malus domestica</i>                    |
| Unigene1514_All    | 51.79  | 8.1     | -2.68 | <i>Prunus mume</i>                        |
| Unigene2548_All    | 149.71 | 2.57    | -5.86 | <i>Medicago truncatula</i>                |
| Unigene13419_All   | 19.38  | 38.9    | 1.01  | <i>Fragaria vesca</i> subsp. <i>Vesca</i> |
| Unigene14299_All   | 22.39  | 55.68   | 1.31  | <i>Cucumis melo</i> subsp. <i>Melo</i>    |
| Unigene39972_All   | 0.29   | 1.43    | 2.30  | <i>Ricinus communis</i>                   |
| <b>APX</b>         |        |         |       |                                           |
| CL6261.Contig2_All | 51.09  | 1266.04 | 4.63  | <i>Mesembryanthemum crystallinum</i>      |
| Unigene10495_All   | 90.75  | 358.03  | 1.98  | <i>Mesembryanthemum crystallinum</i>      |
| CL2860.Contig1_All | 1.38   | 3.83    | 1.47  | <i>Nelumbo nucifera</i>                   |
| CL2142.Contig5_All | 18.02  | 2.19    | -3.04 | <i>Vitis vinifera</i>                     |
| Unigene14065_All   | 173.04 | 59      | -1.55 | <i>Beta vulgaris</i>                      |
| Unigene23148_All   | 2.64   | 0.01    | -8.04 | <i>Theobroma cacao</i>                    |
| <b>MDAR</b>        |        |         |       |                                           |
| Unigene3624_All    | 58.95  | 16.15   | -1.87 | <i>Populus trichocarpa</i>                |
| <b>DHAR</b>        |        |         |       |                                           |
| Unigene3279_All    | 73.9   | 10.69   | -2.7  | <i>Spinacia oleracea</i>                  |
| <b>GR</b>          |        |         |       |                                           |
| CL6002.Contig1_All | 26.75  | 7.67    | -1.80 | <i>Dimocarpus longan</i>                  |
| CL6002.Contig2_All | 7.83   | 1.96    | -2.00 | <i>Morus notabilis</i>                    |
| <b>GST</b>         |        |         |       |                                           |
| CL7491.Contig4_All | 69.03  | 0.7     | -6.62 | <i>Salicornia brachiata</i>               |
| Unigene25569_All   | 2.68   | 0.01    | -8.07 | <i>Theobroma cacao</i>                    |
| Unigene20291_All   | 1.77   | 0.01    | -7.47 | <i>Knorringia sibirica</i>                |
| Unigene1347_All    | 42.65  | 0.95    | -5.49 | <i>Vitis vinifera</i>                     |
| Unigene18893_All   | 1.51   | 0.42    | -1.85 | <i>Brassica rapa</i>                      |
| CL7491.Contig3_All | 12.91  | 20.88   | 0.69  | <i>Salicornia brachiata</i>               |
| CL9647.Contig2_All | 1.06   | 17.3    | 4.03  | <i>Dianthus caryophyllus</i>              |
| Unigene12753_All   | 1.4    | 2.87    | 1.04  | <i>Nelumbo nucifera</i>                   |
| Unigene8569_All    | 4.14   | 18.31   | 2.14  | <i>Cicer arietinum</i>                    |
| Unigene30938_All   | 4.05   | 16.31   | 2.01  | <i>Fragaria vesca</i> subsp. <i>Vesca</i> |
| Unigene20044_All   | 4.04   | 15.84   | 1.97  | <i>Solanum lycopersicum</i>               |
| Unigene7483_All    | 1.61   | 7.78    | 2.27  | [ <i>Salicornia brachiata</i>             |
| Unigene16620_All   | 1.14   | 121.94  | 6.74  | <i>Eucalyptus grandis</i>                 |
| Unigene29351_All   | 0.74   | 114.88  | 7.28  | <i>Eucalyptus grandis</i>                 |
| CL338.Contig1_All  | 0.37   | 2.4     | 2.70  | <i>Nelumbo nucifera</i>                   |
| Unigene39828_All   | 0.01   | 0.36    | 5.17  | <i>Malva pusilla</i>                      |
| Unigene40891_All   | 0.01   | 4.42    | 8.79  | <i>Prunus mume</i>                        |
| CL1984.Contig1_All | 0.01   | 2.25    | 7.81  | <i>Fragaria vesca</i> subsp. <i>Vesca</i> |
| CL2520.Contig2_All | 0.01   | 9.01    | 9.82  | <i>Vitis vinifera</i>                     |
| Unigene13885_All   | 0.01   | 16.44   | 10.68 | <i>Malus domestica</i>                    |

|                    |        |        |       |                                           |
|--------------------|--------|--------|-------|-------------------------------------------|
| CL1382.Contig4_All | 0.01   | 5.16   | 9.01  | <i>Nicotiana sylvestris</i>               |
| <b>GPX</b>         |        |        |       |                                           |
| CL8077.Contig1_All | 0.01   | 2.87   | 8.16  | <i>Theobroma cacao</i>                    |
| CL9800.Contig2_All | 0.01   | 2.73   | 8.09  | <i>Spinacia oleracea</i>                  |
| CL4674.Contig3_All | 0.43   | 1.23   | 1.52  | <i>Theobroma cacao</i>                    |
| Unigene1484_All    | 55.66  | 7.91   | -2.81 | <i>Vitis vinifera</i>                     |
| <b>POD</b>         |        |        |       |                                           |
| CL6553.Contig1_All | 260.56 | 0.58   | -8.81 | <i>Spinacia oleracea</i>                  |
| CL8506.Contig1_All | 20.37  | 5.32   | -1.94 | <i>Spinacia oleracea</i>                  |
| Unigene12176_All   | 158.63 | 0.75   | -7.72 | <i>Spinacia oleracea</i>                  |
| Unigene1571_All    | 24.22  | 3.12   | -2.96 | <i>Spinacia oleracea</i>                  |
| CL4455.Contig1_All | 11.49  | 3.38   | -1.77 | <i>Solanum tuberosum</i>                  |
| Unigene12282_All   | 5.38   | 1.68   | -1.68 | <i>Citrus sinensis</i>                    |
| CL7743.Contig1_All | 0.73   | 17.99  | 4.62  | <i>Spinacia oleracea</i>                  |
| CL1901.Contig3_All | 2.11   | 101.61 | 5.59  | <i>Vitis vinifera</i>                     |
| CL279.Contig1_All  | 0.42   | 63.45  | 7.24  | <i>Fragaria x ananassa</i>                |
| CL3665.Contig1_All | 0.21   | 315.19 | 10.55 | <i>Spinacia oleracea</i>                  |
| CL4099.Contig1_All | 23.65  | 65.77  | 1.48  | <i>Camellia oleifera</i>                  |
| CL4649.Contig2_All | 0.62   | 10.72  | 4.11  | <i>Vitis vinifera</i>                     |
| CL6456.Contig4_All | 12.89  | 136.7  | 3.41  | <i>Phoenix dactylifera</i>                |
| Unigene1466_All    | 13.92  | 30.78  | 1.14  | <i>Spinacia oleracea</i>                  |
| CL9560.Contig1_All | 34.42  | 99.61  | 1.53  | <i>Phoenix dactylifera</i>                |
| Unigene21270_All   | 32.85  | 935.17 | 4.83  | <i>Nelumbo nucifera</i>                   |
| Unigene14000_All   | 19.04  | 657.68 | 5.11  | <i>Spinacia oleracea</i>                  |
| Unigene14074_All   | 15.29  | 42.06  | 1.46  | <i>Theobroma cacao</i>                    |
| Unigene17531_All   | 6.58   | 109.29 | 4.05  | <i>Sesuvium portulacastrum</i>            |
| Unigene15162_All   | 6.32   | 87.95  | 3.80  | <i>Nelumbo nucifera</i>                   |
| CL1981.Contig2_All | 1.93   | 11.59  | 2.59  | <i>Spinacia oleracea</i>                  |
| Unigene1784_All    | 1.09   | 41.53  | 5.25  | <i>Citrus sinensis</i>                    |
| Unigene5115_All    | 1.06   | 54.9   | 5.69  | <i>Vitis vinifera</i>                     |
| Unigene14070_All   | 0.75   | 258.24 | 8.43  | <i>Spinacia oleracea</i>                  |
| Unigene17794_All   | 0.6    | 118.26 | 7.62  | <i>Spinacia oleracea</i>                  |
| Unigene5170_All    | 0.55   | 66.59  | 6.92  | <i>Nicotiana tabacum</i>                  |
| Unigene6747_All    | 0.39   | 121.04 | 8.28  | <i>Stylosanthes humilis</i>               |
| CL3217.Contig2_All | 0.44   | 9.62   | 4.45  | <i>Eucalyptus grandis</i>                 |
| Unigene229_All     | 0.28   | 8.55   | 4.93  | <i>Pyrus x bretschneideri</i>             |
| CL5966.Contig1_All | 0.18   | 588.89 | 11.68 | <i>Nelumbo nucifera</i>                   |
| Unigene9514_All    | 0.09   | 5.44   | 5.92  | <i>Fragaria vesca</i> subsp. <i>Vesca</i> |
| Unigene3282_All    | 0.1    | 159.13 | 10.64 | <i>Spinacia oleracea</i>                  |
| Unigene8100_All    | 0.01   | 4.23   | 8.72  | <i>Musa acuminata</i>                     |
| CL8547.Contig1_All | 0.01   | 6.96   | 9.44  | <i>Malus domestica</i>                    |
| Unigene12967_All   | 0.01   | 7.65   | 9.58  | <i>Malus domestica</i>                    |
| Unigene4101_All    | 0.01   | 10.33  | 10.01 | <i>Beta vulgaris</i>                      |
| CL9189.Contig2_All | 0.01   | 15.98  | 10.64 | <i>Beta vulgaris</i>                      |

|                    |         |         |       |                                      |
|--------------------|---------|---------|-------|--------------------------------------|
| Unigene27160_All   | 0.01    | 20.41   | 11.00 | <i>Nelumbo nucifera</i>              |
| Unigene13832_All   | 0.01    | 25.94   | 11.34 | <i>Theobroma cacao</i>               |
| Unigene6922_All    | 0.01    | 35.76   | 11.80 | <i>Pyrus x bretschneideri</i>        |
| Unigene3299_All    | 0.01    | 40.52   | 11.98 | <i>Spinacia oleracea</i>             |
| Unigene6725_All    | 0.01    | 74.38   | 12.86 | <i>Beta vulgaris</i>                 |
| CL1702.Contig1_All | 0.01    | 105.77  | 13.37 | <i>Spinacia oleracea</i>             |
| CL2372.Contig2_All | 0.01    | 13.4    | 10.39 | <i>Citrus sinensis</i>               |
| CL4649.Contig1_All | 0.01    | 2.24    | 7.81  | <i>Vitis vinifera</i>                |
| CL7743.Contig2_All | 0.01    | 10.34   | 10.01 | <i>Spinacia oleracea</i>             |
| <b>GLP</b>         |         |         |       |                                      |
| Unigene7248_All    | 2.43    | 0.01    | -7.92 | <i>Solanum tuberosum</i>             |
| CL2975.Contig1_All | 1.07    | 4.86    | 2.18  | <i>Vitis vinifera</i>                |
| Unigene16326_All   | 1.7     | 17.64   | 3.38  | <i>Beta vulgaris</i>                 |
| CL7667.Contig1_All | 1.39    | 78.63   | 5.82  | <i>Atriplex lentiformis</i>          |
| Unigene3132_All    | 0.88    | 475.44  | 9.08  | <i>Nelumbo nucifera</i>              |
| Unigene3088_All    | 0.56    | 1004.78 | 10.81 | <i>Atriplex lentiformis</i>          |
| CL2975.Contig2_All | 0.61    | 15.22   | 4.64  | <i>Vitis vinifera</i>                |
| Unigene15617_All   | 0.43    | 4.03    | 3.23  | <i>Solanum lycopersicum</i>          |
| Unigene13948_All   | 0.32    | 229.65  | 9.49  | <i>Atriplex lentiformis</i>          |
| CL5206.Contig1_All | 0.23    | 1797.03 | 12.93 | <i>Glycine max</i>                   |
| CL7904.Contig2_All | 0.2     | 157.39  | 9.62  | <i>Beta vulgaris</i>                 |
| Unigene7967_All    | 0.01    | 6.55    | 9.36  | <i>Beta vulgaris</i>                 |
| CL3077.Contig3_All | 0.01    | 30.51   | 11.58 | <i>Prunus mume</i>                   |
| Unigene12529_All   | 0.01    | 32.97   | 11.69 | <i>Beta vulgaris</i>                 |
| Unigene1703_All    | 0.01    | 37.74   | 11.88 | <i>Prunus mume</i>                   |
| Unigene5013_All    | 0.01    | 253.97  | 14.63 | <i>Mesembryanthemum crystallinum</i> |
| <b>CAT</b>         |         |         |       |                                      |
| CL9309.Contig2_All | 2442.03 | 1163.48 | -1.07 | <i>Gardenia jasminoides</i>          |
| CL9179.Contig1_All | 0.01    | 3.93    | 8.62  | <i>Suaeda salsa</i>                  |
| <b>PEX</b>         |         |         |       |                                      |
| CL9498.Contig2_All | 2.1     | 5.48    | 1.38  | <i>Vitis vinifera</i>                |
| CL638.Contig6_All  | 1.25    | 7.58    | 2.60  | <i>Medicago truncatula</i>           |
| CL395.Contig12_All | 0.7     | 3.95    | 2.50  | <i>Medicago truncatula</i>           |
| CL2792.Contig2_All | 0.01    | 1.72    | 7.43  | <i>Vitis vinifera</i>                |
| CL8785.Contig4_All | 0.01    | 1.54    | 7.27  | <i>Theobroma cacao</i>               |
| <b>Trx</b>         |         |         |       |                                      |
| CL5614.Contig1_All | 100.83  | 0.25    | -8.66 | <i>Brassica rapa</i>                 |
| CL2824.Contig1_All | 215.76  | 1.8     | -6.91 | <i>Spinacia oleracea</i>             |
| Unigene13861_All   | 74.44   | 4.96    | -3.91 | <i>Eucalyptus grandis</i>            |
| Unigene8536_All    | 7.31    | 1.65    | -2.15 | <i>Theobroma cacao</i>               |
| Unigene5401_All    | 36.05   | 8.42    | -2.10 | <i>Eucalyptus grandis</i>            |
| CL630.Contig7_All  | 37.99   | 11.15   | -1.77 | <i>Solanum tuberosum</i>             |
| Unigene12286_All   | 44.31   | 15.05   | -1.56 | <i>Theobroma cacao</i>               |
| CL4320.Contig2_All | 4.4     | 0.01    | -8.78 | <i>Vitis vinifera</i>                |



|                    |        |       |        |                                      |
|--------------------|--------|-------|--------|--------------------------------------|
| CL8815.Contig2_All | 24.25  | 2.68  | -3.18  | <i>Malus domestica</i>               |
| Unigene6798_All    | 464.18 | 0.22  | -11.04 | <i>Spinacia oleracea</i>             |
| Unigene6795_All    | 61.94  | 7.9   | -2.97  | <i>Cucumis melo</i>                  |
| Unigene12087_All   | 429.05 | 3.72  | -6.85  | <i>Spinacia oleracea</i>             |
| Unigene3533_All    | 130.41 | 16.13 | -3.02  | <i>Spinacia oleracea</i>             |
| Unigene12308_All   | 11.51  | 37.92 | 1.72   | <i>Fragaria vesca subsp. Vesca</i>   |
| Unigene1940_All    | 0.45   | 5.92  | 3.72   | <i>Prunus mume</i>                   |
| Unigene5866_All    | 0.08   | 2.13  | 4.73   | <i>Vitis vinifera</i>                |
| Unigene12094_All   | 11.55  | 44.93 | 1.96   | <i>Tamarix hispida</i>               |
| <b>PrxR</b>        |        |       |        |                                      |
| Unigene13818_All   | 71.42  | 2.76  | -4.69  | <i>Vitis vinifera</i>                |
| Unigene5142_All    | 315.26 | 19.53 | -4.01  | <i>Tamarix hispida</i>               |
| Unigene1465_All    | 145.95 | 41.76 | -1.81  | <i>Tamarix hispida</i>               |
| CL7966.Contig1_All | 76.42  | 25.89 | -1.56  | <i>Cicer arietinum</i>               |
| CL7936.Contig1_All | 218.86 | 4.31  | -5.67  | <i>Suaeda salsa</i>                  |
| <b>SOD</b>         |        |       |        |                                      |
| CL5119.Contig3_All | 6.05   | 0.44  | -3.78  | <i>Nicotiana tomentosiformis</i>     |
| Unigene5793_All    | 405.05 | 65.24 | -2.63  | <i>Phytolacca acinosa</i>            |
| Unigene3542_All    | 38.69  | 11.5  | -1.75  | <i>Mesembryanthemum crystallinum</i> |
| CL2699.Contig1_All | 36.92  | 10.33 | -1.84  | <i>Spinacia oleracea</i>             |
| CL1360.Contig2_All | 33.68  | 11.18 | -1.59  | <i>Chenopodiastrum murale</i>        |
| Unigene35175_All   | 0.01   | 1.91  | 7.58   | <i>Mesembryanthemum crystallinum</i> |

**Table S10.** Differentially expressed genes (DEGs) related to enzymatic antioxidant defense systems in leaves of *A. canescens* after 100 mM NaCl treatment for 24 h. FPKM-CL24 and FPKM-SL24 respectively indicates the FPKM value of a gene in leaves under control condition for 24 h and salt treatment for 24 h. Fold change equals to  $\log_2$  (FPKM-SL24 / FPKM-CL24). Protein refer to the protein encoded by each DEGs.

| Gene ID            | FPKM-CL24 | FPKM-SL24 | Fold change | Homologous species                   |
|--------------------|-----------|-----------|-------------|--------------------------------------|
| <b>GLR</b>         |           |           |             |                                      |
| CL3957.Contig2_All | 0.01      | 0.97      | 6.60        | <i>Rheum australe</i>                |
| <b>APX</b>         |           |           |             |                                      |
| CL2142.Contig1_All | 0.01      | 1.83      | 7.52        | <i>Vitis vinifera</i>                |
| CL6261.Contig2_All | 12.07     | 24.51     | 1.02        | <i>Mesembryanthemum crystallinum</i> |
| CL2142.Contig4_All | 4.2       | 1.8       | -1.22       | <i>Vitis vinifera</i>                |
| <b>GR</b>          |           |           |             |                                      |
| CL6002.Contig2_All | 0.62      | 2.47      | 1.99        | <i>Morus notabilis</i>               |
| <b>GST</b>         |           |           |             |                                      |
| Unigene25569_All   | 2.38      | 0.64      | -1.89       | <i>Theobroma cacao</i>               |
| CL2520.Contig2_All | 0.11      | 0.01      | -3.46       | <i>Vitis vinifera</i>                |
| CL7491.Contig3_All | 0.86      | 28.08     | 5.03        | <i>Salicornia brachiata</i>          |
| CL9647.Contig3_All | 0.68      | 1.95      | 1.52        | <i>Dianthus caryophyllus</i>         |

|                    |      |       |       |                             |
|--------------------|------|-------|-------|-----------------------------|
| Unigene12753_All   | 0.18 | 0.72  | 2.00  | Nelumbo nucifera            |
| Unigene18323_All   | 4.01 | 9.39  | 1.23  | Nelumbo nucifera            |
| Unigene7483_All    | 0.42 | 0.97  | 1.21  | Salicornia brachiata        |
| CL1382.Contig4_All | 0.66 | 2.83  | 2.10  | Solanum tuberosum           |
| CL338.Contig1_All  | 0.01 | 0.17  | 4.09  | Nelumbo nucifera            |
| Unigene30938_All   | 0.01 | 4.22  | 8.72  | Fragaria vesca subsp. vesca |
| Unigene16620_All   | 0.01 | 0.11  | 3.46  | Eucalyptus grandis          |
| CL1382.Contig1_All | 0.01 | 0.12  | 3.58  | Dianthus caryophyllus       |
| <b>GSH-Px</b>      |      |       |       |                             |
| CL8077.Contig2_All | 0.01 | 4.66  | 8.86  | Theobroma cacao             |
| CL4674.Contig3_All | 0.01 | 4.25  | 8.73  | Theobroma cacao             |
| CL9800.Contig4_All | 1.57 | 6.51  | 2.05  | Spinacia oleracea           |
| CL6571.Contig1_All | 4.58 | 11.98 | 1.39  | Spinacia oleracea           |
| CL4674.Contig2_All | 4.46 | 0.01  | -8.80 |                             |
| CL4674.Contig4_All | 0.43 | 0.01  | -5.43 | Theobroma cacao             |
| <b>POD</b>         |      |       |       |                             |
| CL6405.Contig1_All | 0.01 | 4.35  | 8.76  | Spinacia oleracea           |
| CL279.Contig2_All  | 0.01 | 2.34  | 7.87  | Fragaria x ananassa         |
| CL3665.Contig1_All | 0.01 | 0.2   | 4.32  | Spinacia oleracea           |
| CL5563.Contig2_All | 0.01 | 0.53  | 5.73  | Citrus sinensis             |
| Unigene31890_All   | 0.01 | 0.97  | 6.60  | Morus notabilis             |
| Unigene6725_All    | 0.01 | 0.17  | 4.09  | Beta vulgaris               |
| Unigene6747_All    | 0.01 | 0.07  | 2.81  | Stylosanthes humilis        |
| CL6456.Contig1_All | 2.72 | 5.85  | 1.10  | Eucalyptus grandis          |
| Unigene17794_All   | 0.24 | 1.63  | 2.76  | Spinacia oleracea           |
| Unigene15162_All   | 0.57 | 2     | 1.81  | Nelumbo nucifera            |
| CL9481.Contig2_All | 0.3  | 0.76  | 1.34  | Spinacia oleracea           |
| Unigene27958_All   | 1.62 | 3.79  | 1.23  | Phoenix dactylifera         |
| CL9189.Contig2_All | 0.16 | 0.08  | -1.00 | Beta vulgaris               |
| Unigene3282_All    | 0.54 | 0.18  | -1.58 | Spinacia oleracea           |
| Unigene5115_All    | 1.5  | 0.5   | -1.58 | Vitis vinifera              |
| Unigene14070_All   | 0.08 | 0.01  | -3.00 | Spinacia oleracea           |
| Unigene3299_All    | 0.08 | 0.01  | -3.00 | Spinacia oleracea           |
| Unigene4101_All    | 0.19 | 0.01  | -4.25 | Beta vulgaris               |
| CL3665.Contig5_All | 3.04 | 1.2   | -1.34 | Spinacia oleracea           |
| CL4649.Contig2_All | 4.18 | 0.59  | -2.82 | Vitis vinifera              |
| CL6405.Contig2_All | 8.57 | 3.66  | -1.23 | Spinacia oleracea           |
| <b>GLP</b>         |      |       |       |                             |
| CL3077.Contig3_All | 0.12 | 0.01  | -3.58 | Prunus mume                 |
| CL5206.Contig1_All | 0.65 | 0.11  | -2.56 | Glycine max                 |
| Unigene15617_All   | 1.36 | 0.01  | -7.09 | Solanum lycopersicum        |
| Unigene1821_All    | 3.81 | 1.19  | -1.68 | Nelumbo nucifera            |
| CL5206.Contig2_All | 0.3  | 0.91  | 1.60  | Eucalyptus grandis          |
| CL7667.Contig2_All | 0.45 | 0.93  | 1.05  | Vitis vinifera              |

|                    |       |       |        |                                  |
|--------------------|-------|-------|--------|----------------------------------|
| Unigene26176_All   | 0.48  | 3.88  | 3.01   | Nelumbo nucifera                 |
| Unigene7248_All    | 3.28  | 6.92  | 1.08   | Solanum tuberosum                |
| CL2517.Contig3_All | 1.11  | 3.67  | 1.73   | Chenopodium quinoa               |
| CL585.Contig2_All  | 0.78  | 1.56  | 1.00   | Vitis vinifera                   |
| CL2975.Contig1_All | 1.09  | 2.35  | 1.11   | Vitis vinifera                   |
| Unigene3088_All    | 0.01  | 0.42  | 5.39   | Atriplex lentiformis             |
| Unigene5013_All    | 0.01  | 0.22  | 4.46   | Mesembryanthemum<br>crystallinum |
| <b>CAT</b>         |       |       |        |                                  |
| CL9179.Contig1_All | 1.24  | 0.01  | -6.954 | Suaeda salsa                     |
| <b>PEX</b>         |       |       |        |                                  |
| CL1753.Contig5_All | 3.85  | 17.05 | 2.15   | Eucalyptus grandis               |
| CL8785.Contig7_All | 0.01  | 0.48  | 5.58   | Solanum lycopersicum             |
| CL395.Contig12_All | 2.63  | 1.27  | -1.05  | Medicago truncatula              |
| <b>Trx</b>         |       |       |        |                                  |
| CL4502.Contig2_All | 3.34  | 0.01  | -8.38  | Morus notabilis                  |
| Unigene4304_All    | 2.01  | 0.01  | -7.65  | Nicotiana tabacum                |
| Unigene36570_All   | 1.14  | 0.01  | -6.83  | Theobroma cacao                  |
| CL1197.Contig2_All | 0.96  | 0.01  | -6.58  | Nicotiana sylvestris             |
| CL630.Contig8_All  | 2.95  | 0.98  | -1.59  | Populus trichocarpa              |
| Unigene5866_All    | 0.04  | 0.24  | 2.58   | Vitis vinifera                   |
| CL5985.Contig2_All | 0.53  | 2.67  | 2.33   | Theobroma cacao                  |
| Unigene1940_All    | 0.13  | 0.26  | 1.00   | Prunus mume                      |
| <b>SOD</b>         |       |       |        |                                  |
| CL1360.Contig2_All | 53.61 | 16.21 | -1.73  | Chenopodium murale               |
| CL2699.Contig1_All | 42.13 | 18.35 | -1.20  | pinacia oleracea                 |
| CL2699.Contig2_All | 92.71 | 17.12 | -2.44  | pinacia oleracea                 |
| CL5754.Contig2_All | 1.54  | 0.01  | -7.27  | Caragana jubata                  |
| CL9769.Contig1_All | 4.15  | 1.69  | -1.30  | Caragana jubata                  |
| CL5119.Contig3_All | 2.31  | 6.18  | 1.42   | Nicotiana tomentosiformis        |

**Table S11.** Differentially expressed genes (DEGs) related to enzymatic antioxidant defense systems in roots of *A. canescens* after 100 mM NaCl treatment for 6 h. FPKM-CR6 and FPKM-SR6 respectively indicates the FPKM value of a gene in roots under control condition for 6 h and salt treatment for 6 h. Fold change equals to  $\log_2$  (FPKM-SR6 / FPKM-CR6). Protein refer to the protein encoded by each DEGs.

| Gene ID          | FPKM-CR6 | FPKM-SR6 | Fold change | Homologous species  |
|------------------|----------|----------|-------------|---------------------|
| <b>Grx</b>       |          |          |             |                     |
| Unigene2548_All  | 1.4      | 127.23   | 6.51        | Medicago truncatula |
| Unigene13286_All | 2.77     | 196.3    | 6.15        | Malus domestica     |
| Unigene10362_All | 10.72    | 80.63    | 2.91        | Prunus mume         |

|                    |         |        |        |                                      |
|--------------------|---------|--------|--------|--------------------------------------|
| Unigene1514_All    | 9.95    | 39.91  | 2.00   | <i>Prunus mume</i>                   |
| Unigene8875_All    | 6.2     | 1.2    | -2.37  | <i>Vitis vinifera</i>                |
| CL6408.Contig1_All | 16.39   | 6.41   | -1.35  | <i>Vitis vinifera</i>                |
| <b>APX</b>         |         |        |        |                                      |
| CL2142.Contig5_All | 0.63    | 3.07   | 2.28   | <i>Glycine max</i>                   |
| Unigene14065_All   | 66.42   | 195.12 | 1.55   | <i>Beta vulgaris</i>                 |
| CL546.Contig2_All  | 18.36   | 43.04  | 1.23   | <i>Spinacia oleracea</i>             |
| CL6261.Contig2_All | 1535.42 | 33.99  | -5.50  | <i>Mesembryanthemum crystallinum</i> |
| Unigene10495_All   | 407.65  | 67.89  | -2.59  | <i>Mesembryanthemum crystallinum</i> |
| Unigene6976_All    | 373.03  | 135.88 | -1.46  | <i>Spinacia oleracea</i>             |
| <b>MDAR</b>        |         |        |        |                                      |
| Unigene3624_All    | 17.43   | 51.72  | 1.57   | <i>Populus trichocarpa</i>           |
| CL5271.Contig2_All | 3.33    | 0.01   | -8.38  | <i>Glycine max</i>                   |
| <b>DHAR</b>        |         |        |        |                                      |
| Unigene3279_All    | 9.54    | 65.18  | 2.77   | <i>Spinacia oleracea</i>             |
| <b>GR</b>          |         |        |        |                                      |
| CL6002.Contig1_All | 7.86    | 31.31  | 1.99   | <i>Dimocarpus longan</i>             |
| <b>GST</b>         |         |        |        |                                      |
| CL7491.Contig4_All | 0.57    | 55.53  | 6.61   | <i>Salicornia brachiata</i>          |
| CL7491.Contig3_All | 10.17   | 26.87  | 1.40   | <i>Salicornia brachiata</i>          |
| Unigene1347_All    | 0.52    | 45.29  | 6.44   | <i>Vitis vinifera</i>                |
| Unigene13945_All   | 12.03   | 24.8   | 1.04   | <i>Capsicum chinense</i>             |
| CL1382.Contig4_All | 11.32   | 0.01   | -10.14 | <i>Dianthus caryophyllus</i>         |
| Unigene16620_All   | 118.3   | 0.01   | -13.53 | <i>Eucalyptus grandis</i>            |
| Unigene13885_All   | 19.39   | 0.01   | -10.92 | <i>Malus domestica</i>               |
| Unigene29351_All   | 87.79   | 0.1    | -9.78  | <i>Eucalyptus grandis</i>            |
| CL1984.Contig1_All | 6.87    | 0.01   | -9.42  | <i>Fragaria vesca subsp. vesca</i>   |
| Unigene12753_All   | 5.32    | 0.01   | -9.06  | <i>Nelumbo nucifera</i>              |
| CL2520.Contig2_All | 3.57    | 0.01   | -8.48  | <i>Vitis vinifera</i>                |
| CL9647.Contig1_All | 629.6   | 113.16 | -2.48  | <i>Dianthus caryophyllus</i>         |
| Unigene8569_All    | 19.91   | 1.28   | -3.96  | <i>Cicer arietinum</i>               |
| Unigene30938_All   | 40.81   | 2.83   | -3.85  | <i>Fragaria vesca subsp. vesca</i>   |
| Unigene18323_All   | 16.2    | 2.25   | -2.85  | <i>Nelumbo nucifera</i>              |
| Unigene7483_All    | 4.6     | 1.12   | -2.04  | <i>Salicornia brachiata</i>          |
| <b>GSH-Px</b>      |         |        |        |                                      |
| CL4674.Contig3_All | 0.01    | 5.07   | 8.99   | <i>Theobroma cacao</i>               |
| CL9800.Contig4_All | 0.01    | 2.83   | 8.14   | <i>Spinacia oleracea</i>             |
| Unigene1484_All    | 8.51    | 34.78  | 2.03   | <i>Vitis vinifera</i>                |
| CL4674.Contig2_All | 3.01    | 0.01   | -8.23  |                                      |
| CL8077.Contig2_All | 12.95   | 2.96   | -2.13  | <i>Theobroma cacao</i>               |
| Unigene4949_All    | 21      | 9.89   | -1.09  | <i>Nicotiana sylvestris</i>          |
| <b>POD</b>         |         |        |        |                                      |

|                    |        |        |        |                                          |
|--------------------|--------|--------|--------|------------------------------------------|
| CL6405.Contig2_All | 0.59   | 7.29   | 3.63   | <i>Spinacia oleracea</i>                 |
| CL6553.Contig2_All | 0.6    | 59.55  | 6.63   | <i>Eucalyptus grandis</i>                |
| Unigene12176_All   | 1.66   | 113.26 | 6.09   | <i>Spinacia oleracea</i>                 |
| CL8506.Contig2_All | 6.96   | 14.15  | 1.02   | <i>Spinacia oleracea</i>                 |
| Unigene1571_All    | 5.93   | 24.94  | 2.07   | <i>Spinacia oleracea</i>                 |
| Unigene5807_All    | 11.62  | 35.85  | 1.63   | <i>Nelumbo nucifera</i>                  |
| CL1702.Contig1_All | 109.26 | 0.01   | -13.42 | <i>Spinacia oleracea</i>                 |
| CL1901.Contig1_All | 79.81  | 3.32   | -4.59  | <i>Nelumbo nucifera</i>                  |
| CL1981.Contig1_All | 29.04  | 13.47  | -1.11  | <i>Spinacia oleracea</i>                 |
| CL2372.Contig2_All | 10.01  | 0.01   | -9.97  | <i>Citrus sinensis</i>                   |
| CL279.Contig1_All  | 34.16  | 3.11   | -3.46  | <i>Fragaria x ananassa</i>               |
| CL3217.Contig2_All | 42.49  | 0.88   | -5.59  | <i>Eucalyptus grandis</i>                |
| CL3665.Contig1_All | 303.91 | 0.01   | -14.89 | <i>Spinacia oleracea</i>                 |
| CL4099.Contig1_All | 91.92  | 45.65  | -1.01  | <i>Camellia oleifera</i>                 |
| CL4649.Contig1_All | 3.01   | 0.01   | -8.23  | <i>Vitis vinifera</i>                    |
| CL5966.Contig1_All | 364.97 | 0.26   | -10.46 | <i>Nelumbo nucifera</i>                  |
| CL6456.Contig4_All | 124.14 | 16.87  | -2.88  | <i>Phoenix dactylifera</i>               |
| CL7743.Contig1_All | 12.27  | 0.14   | -6.45  | <i>Spinacia oleracea</i>                 |
| CL7926.Contig1_All | 18.5   | 0.48   | -5.27  | <i>Prunus mume</i>                       |
| CL8547.Contig1_All | 4.31   | 0.01   | -8.75  | <i>Malus domestica</i>                   |
| CL9189.Contig2_All | 9.87   | 0.01   | -9.95  | <i>Beta vulgaris</i>                     |
| CL9560.Contig1_All | 151.39 | 74.64  | -1.02  | <i>Phoenix dactylifera</i>               |
| Unigene12967_All   | 2.41   | 0.01   | -7.91  | <i>Malus domestica</i>                   |
| Unigene13832_All   | 24.27  | 0.01   | -11.24 | <i>Theobroma cacao</i>                   |
| Unigene14000_All   | 647.44 | 18.81  | -5.11  | <i>Spinacia oleracea</i>                 |
| Unigene14070_All   | 251    | 0.16   | -10.62 | <i>Spinacia oleracea</i>                 |
| Unigene14074_All   | 42.01  | 13.91  | -1.59  | <i>Theobroma cacao</i>                   |
| Unigene15162_All   | 99.41  | 10.59  | -3.23  | <i>Nelumbo nucifera</i>                  |
| Unigene17531_All   | 123.64 | 4.01   | -4.95  | <i>Sesuvium portulacastrum</i>           |
| Unigene17794_All   | 104.12 | 0.49   | -7.73  | <i>Spinacia oleracea</i>                 |
| Unigene1784_All    | 16.62  | 1.21   | -3.78  | <i>Citrus sinensis</i>                   |
| Unigene21270_All   | 881.6  | 40.77  | -4.43  | <i>Nelumbo nucifera</i>                  |
| Unigene229_All     | 3.17   | 0.01   | -8.31  | <i>Pyrus x bretschneideri</i>            |
| Unigene27160_All   | 20.48  | 1.34   | -3.93  | <i>Nelumbo nucifera</i>                  |
| Unigene27958_All   | 40.86  | 7.61   | -2.42  | <i>Phoenix dactylifera</i>               |
| Unigene3282_All    | 137.28 | 0.01   | -13.74 | <i>Spinacia oleracea</i>                 |
| Unigene3299_All    | 13.34  | 0.17   | -6.29  | <i>Spinacia oleracea</i>                 |
| Unigene4101_All    | 7.61   | 0.01   | -9.57  | <i>Beta vulgaris</i>                     |
| Unigene5115_All    | 52.03  | 0.84   | -5.95  | <i>Vitis vinifera</i>                    |
| Unigene5170_All    | 73.03  | 0.78   | -6.55  | <i>Nicotiana tabacum</i>                 |
| Unigene6725_All    | 69.54  | 0.01   | -12.76 | <i>Beta vulgaris</i>                     |
| Unigene6747_All    | 142.08 | 0.01   | -13.79 | <i>Stylosanthes humilis</i>              |
| Unigene6922_All    | 33.1   | 0.01   | -11.69 | <i>Pyrus x bretschneideri</i>            |
| Unigene8100_All    | 1.82   | 0.01   | -7.51  | <i>Musa acuminata subsp. malaccensis</i> |

|                    |         |        |        |                                      |
|--------------------|---------|--------|--------|--------------------------------------|
| Unigene8726_All    | 216.66  | 0.69   | -8.29  | <i>Vitis vinifera</i>                |
| Unigene8799_All    | 16.1    | 0.01   | -10.65 |                                      |
| Unigene9514_All    | 3.72    | 0.01   | -8.54  | <i>Fragaria vesca subsp. vesca</i>   |
| <b>GLP</b>         |         |        |        |                                      |
| CL2517.Contig3_All | 3.73    | 0.8    | -2.22  | <i>Glycine max</i>                   |
| CL2975.Contig1_All | 10.63   | 1.43   | -2.89  | <i>Vitis vinifera</i>                |
| CL3077.Contig3_All | 44.94   | 0.01   | -12.13 | <i>Prunus mume</i>                   |
| CL4866.Contig2_All | 23.86   | 0.01   | -11.22 | <i>Beta vulgaris</i>                 |
| CL5206.Contig1_All | 1266.39 | 0.32   | -11.95 | <i>Glycine max</i>                   |
| CL585.Contig1_All  | 8.06    | 0.01   | -9.65  | <i>Vitis vinifera</i>                |
| CL7262.Contig1_All | 3.12    | 0.01   | -8.29  | <i>Beta vulgaris</i>                 |
| CL7667.Contig1_All | 80.29   | 0.38   | -7.72  | <i>Atriplex lentiformis</i>          |
| CL7904.Contig1_All | 156.97  | 0.01   | -13.94 | <i>Beta vulgaris</i>                 |
| Unigene12529_All   | 49.27   | 0.01   | -12.27 | <i>Beta vulgaris</i>                 |
| Unigene12866_All   | 81.41   | 3.92   | -4.38  | <i>Atriplex lentiformis</i>          |
| Unigene13948_All   | 262.08  | 0.2    | -10.36 | <i>Atriplex lentiformis</i>          |
| Unigene16326_All   | 25.61   | 1.52   | -4.07  | <i>Beta vulgaris</i>                 |
| Unigene1703_All    | 63.69   | 0.01   | -12.64 | <i>Prunus mume</i>                   |
| Unigene1714_All    | 19.89   | 9.45   | -1.07  | <i>Fragaria vesca subsp. vesca</i>   |
| Unigene3088_All    | 1218.1  | 0.64   | -10.89 | <i>Atriplex lentiformis</i>          |
| Unigene3091_All    | 137.58  | 23.76  | -2.53  | <i>Vitis vinifera</i>                |
| Unigene3132_All    | 603.98  | 1.04   | -9.18  | <i>Nelumbo nucifera</i>              |
| Unigene5013_All    | 292.63  | 0.11   | -11.38 | <i>Mesembryanthemum crystallinum</i> |
| Unigene7967_All    | 7.27    | 0.01   | -9.51  | <i>Beta vulgaris</i>                 |
| Unigene7248_All    | 0.01    | 8.16   | 9.67   | <i>Solanum tuberosum</i>             |
| <b>CAT</b>         |         |        |        |                                      |
| CL9309.Contig1_All | 3.03    | 12.95  | 2.10   | <i>Suaeda salsa</i>                  |
| CL9179.Contig2_All | 114.47  | 457.86 | 1.20   | <i>Suaeda salsa</i>                  |
| <b>PEX</b>         |         |        |        |                                      |
| CL395.Contig12_All | 3.4     | 0.01   | -8.41  | <i>Medicago truncatula</i>           |
| CL638.Contig6_All  | 13.62   | 1.64   | -3.05  | <i>Medicago truncatula</i>           |
| CL8785.Contig4_All | 3.34    | 0.01   | -8.38  | <i>Theobroma cacao</i>               |
| Unigene9291_All    | 13.28   | 5.95   | -1.16  | <i>Solanum lycopersicum</i>          |
| Unigene7436_All    | 28.23   | 4.38   | -2.69  | <i>Nelumbo nucifera</i>              |
| CL9371.Contig1_All | 20.86   | 8.58   | -1.28  | <i>Cucumis melo</i>                  |
| Unigene3397_All    | 10.47   | 4.96   | -1.08  | <i>Fragaria vesca subsp. vesca</i>   |
| Unigene14919_All   | 68.34   | 33.51  | -1.03  | <i>Nelumbo nucifera</i>              |
| CL8126.Contig2_All | 46.72   | 20.6   | -1.18  | <i>Vitis vinifera</i>                |
| Unigene16102_All   | 0.22    | 11.54  | 5.71   | <i>Glycine max</i>                   |
| CL2499.Contig4_All | 26.46   | 628.16 | 4.57   | <i>Spinacia oleracea</i>             |
| Unigene28652_All   | 0.84    | 15.66  | 4.22   | <i>Vitis vinifera</i>                |
| CL2499.Contig7_All | 36.21   | 625.93 | 4.11   | <i>Spinacia oleracea</i>             |
| Unigene18788_All   | 0.25    | 3.43   | 3.78   | <i>Vitis vinifera</i>                |

|                    |       |       |      |                                  |
|--------------------|-------|-------|------|----------------------------------|
| CL2602.Contig1_All | 1.17  | 11.64 | 3.31 | <i>Vitis vinifera</i>            |
| CL4210.Contig2_All | 0.58  | 3.6   | 2.63 | <i>Vitis vinifera</i>            |
| CL3399.Contig3_All | 2.97  | 12.76 | 2.10 | <i>Nicotiana tomentosiformis</i> |
| CL5507.Contig2_All | 22.94 | 71.41 | 1.64 | <i>Vitis vinifera</i>            |
| Unigene2492_All    | 17.5  | 54.39 | 1.64 | <i>Theobroma cacao</i>           |
| CL3148.Contig2_All | 2.96  | 7.83  | 1.40 | <i>Solanum lycopersicum</i>      |
| CL5507.Contig3_All | 31.12 | 78.59 | 1.34 | <i>Vitis vinifera</i>            |
| Unigene8760_All    | 7.39  | 16.83 | 1.19 | <i>Medicago truncatula</i>       |

#### Trx

|                    |         |        |       |                                    |
|--------------------|---------|--------|-------|------------------------------------|
| CL2824.Contig1_All | 1.32    | 238.95 | 7.50  | <i>Spinacia oleracea</i>           |
| CL4320.Contig1_All | 10.15   | 81.07  | 3.00  | <i>Vitis vinifera</i>              |
| CL5614.Contig1_All | 0.99    | 43     | 5.44  | <i>Brassica rapa</i>               |
| CL630.Contig7_All  | 13.73   | 30.36  | 1.14  | <i>Solanum tuberosum</i>           |
| Unigene6798_All    | 0.65    | 515.84 | 9.63  | <i>Spinacia oleracea</i>           |
| Unigene13861_All   | 4.77    | 57.66  | 3.60  | <i>Eucalyptus grandis</i>          |
| Unigene6795_All    | 9.81    | 63.79  | 2.70  | <i>Cucumis melo</i>                |
| Unigene8536_All    | 1.03    | 6.4    | 2.64  | <i>Theobroma cacao</i>             |
| Unigene5401_All    | 7.07    | 40.14  | 2.51  | <i>Eucalyptus grandis</i>          |
| CL8815.Contig2_All | 3.94    | 21.32  | 2.44  | <i>Malus domestica</i>             |
| Unigene5160_All    | 15.74   | 43.22  | 1.46  | <i>Theobroma cacao</i>             |
| Unigene12286_All   | 14.62   | 38.85  | 1.41  | <i>Theobroma cacao</i>             |
| Unigene10424_All   | 13.99   | 30.23  | 1.11  | <i>Prunus mume</i>                 |
| Unigene12087_All   | 2.43    | 453.48 | 7.54  | <i>Spinacia oleracea</i>           |
| Unigene3533_All    | 14.36   | 115.19 | 3.00  | <i>Spinacia oleracea</i>           |
| CL7936.Contig1_All | 3.38    | 145.43 | 5.43  | <i>Suaeda salsa</i>                |
| Unigene18720_All   | 1940.74 | 764.7  | -1.34 |                                    |
| Unigene12094_All   | 48.24   | 13.28  | -1.86 | <i>Tamarix hispida</i>             |
| Unigene12308_All   | 44.42   | 12.01  | -1.89 | <i>Fragaria vesca subsp. vesca</i> |
| Unigene1940_All    | 6.68    | 0.56   | -3.58 | <i>Prunus mume</i>                 |
| Unigene5866_All    | 2.34    | 0.12   | -4.29 | <i>Vitis vinifera</i>              |
| CL1197.Contig1_All | 2.28    | 0.01   | -7.83 | <i>Nicotiana sylvestris</i>        |
| Unigene5027_All    | 48.74   | 12.4   | -1.97 | <i>Cucumis melo</i>                |

#### PrxR

|                    |       |        |      |                        |
|--------------------|-------|--------|------|------------------------|
| Unigene13818_All   | 3.81  | 38.69  | 3.34 | <i>Vitis vinifera</i>  |
| Unigene5142_All    | 30.34 | 198.95 | 2.71 | <i>Tamarix hispida</i> |
| CL7966.Contig2_All | 7.35  | 37.87  | 2.37 | <i>Cicer arietinum</i> |
| Unigene1465_All    | 47.6  | 95.22  | 1.00 | <i>Tamarix hispida</i> |
| CL7936.Contig1_All | 3.38  | 145.43 | 5.43 | <i>Suaeda salsa</i>    |

#### SOD

|                    |       |        |      |                           |
|--------------------|-------|--------|------|---------------------------|
| CL5119.Contig3_All | 0.01  | 8.8    | 9.78 | <i>Suaeda salsa</i>       |
| Unigene5793_All    | 45.92 | 353.49 | 2.94 | <i>Phytolacca acinosa</i> |
| CL1360.Contig2_All | 12.23 | 73.9   | 2.60 | <i>Chenopodium murale</i> |
| CL2699.Contig2_All | 9.67  | 112.87 | 3.55 | <i>Suaeda salsa</i>       |
| Unigene3542_All    | 13.19 | 29.04  | 1.14 | <i>Tamarix hispida</i>    |

**Table S12.** Differentially expressed genes (DEGs) related to enzymatic antioxidant defense systems in roots of *A. canescens* after 100 mM NaCl treatment for 24 h. FPKM-CR24 and FPKM-SR24 respectively indicates the FPKM value of a gene in roots under control condition for 24 h and salt treatment for 24 h. Fold change equals to  $\log_2$  (FPKM-SR24 / FPKM-CR24). Protein refer to the protein encoded by each DEGs.

| Gene ID            | FPKM-CR24 | FPKM-SR24 | Fold change | Homologous species              |
|--------------------|-----------|-----------|-------------|---------------------------------|
| <b>GLR</b>         |           |           |             |                                 |
| CL3957.Contig2_All | 0.01      | 1.04      | 6.70        | <i>Rheum australe</i>           |
| Unigene40963_All   | 0.66      | 1.35      | 1.03        | <i>Coccomyxa subellipsoidea</i> |
| Unigene2548_All    | 0.85      | 10.15     | 3.58        | <i>Medicago truncatula</i>      |
| Unigene39972_All   | 0.57      | 0.01      | -5.83       | <i>Ricinus communis</i>         |
| Unigene16019_All   | 4.01      | 1.44      | -1.48       | <i>Rheum australe</i>           |
| <b>APX</b>         |           |           |             |                                 |
| CL2860.Contig2_All | 0.01      | 1.58      | 7.30        | <i>Glycine max</i>              |
| Unigene23148_All   | 0.01      | 0.85      | 6.41        | <i>Theobroma cacao</i>          |
| CL2142.Contig1_All | 0.01      | 0.34      | 5.09        | <i>Vitis vinifera</i>           |
| <b>MDAR</b>        |           |           |             |                                 |
| CL5271.Contig1_All | 1.09      | 2.78      | 1.35        | <i>Glycine max</i>              |
| <b>GST</b>         |           |           |             |                                 |
| CL7491.Contig3_All | 0.01      | 4.55      | 8.83        | <i>Salicornia brachiata</i>     |
| Unigene39828_All   | 0.01      | 0.81      | 6.34        | <i>Malva pusilla</i>            |
| CL7491.Contig1_All | 0.39      | 1.01      | 1.37        | <i>Salicornia brachiata</i>     |
| Unigene20291_All   | 0.29      | 0.6       | 1.05        | <i>Knorringia sibirica</i>      |
| Unigene25569_All   | 0.17      | 0.34      | 1.00        | <i>Theobroma cacao</i>          |
| CL2520.Contig2_All | 12.86     | 5.09      | -1.34       | <i>Vitis vinifera</i>           |
| Unigene20044_All   | 6.52      | 2.49      | -1.39       | <i>Solanum lycopersicum</i>     |
| Unigene18893_All   | 0.56      | 0.23      | -1.28       | <i>Brassica rapa</i>            |
| <b>GSH-Px</b>      |           |           |             |                                 |
| CL9800.Contig1_All | 0.01      | 0.96      | 6.58        | <i>Spinacia oleracea</i>        |
| CL8077.Contig1_All | 2.2       | 0.01      | -7.78       | <i>Theobroma cacao</i>          |
| CL9800.Contig4_All | 2.09      | 0.37      | -2.50       | <i>Spinacia oleracea</i>        |
| CL4674.Contig3_All | 5         | 1.12      | -2.16       | <i>Theobroma cacao</i>          |
| <b>POD</b>         |           |           |             |                                 |
| CL5563.Contig2_All | 1.28      | 2.86      | 1.16        | <i>Citrus sinensis</i>          |
| CL6456.Contig3_All | 5.34      | 12.25     | 1.20        | <i>Eucalyptus grandis</i>       |
| CL7926.Contig3_All | 18.71     | 44.18     | 1.24        | <i>Ricinus communis</i>         |
| Unigene35178_All   | 0.61      | 2.5       | 2.04        | <i>Prunus mume</i>              |
| CL4649.Contig1_All | 4.5       | 1.2       | -1.91       | <i>Vitis vinifera</i>           |
| CL8547.Contig1_All | 11.67     | 5.54      | -1.07       | <i>Malus domestica</i>          |
| Unigene12755_All   | 15.87     | 4.73      | -1.75       | <i>Vitis vinifera</i>           |
| Unigene12967_All   | 10.87     | 2.86      | -1.93       | <i>Malus domestica</i>          |



|                    |       |        |       |                               |
|--------------------|-------|--------|-------|-------------------------------|
| Unigene1784_All    | 77.31 | 22.04  | -1.81 | <i>Citrus sinensis</i>        |
| Unigene21864_All   | 0.53  | 0.01   | -5.73 | <i>Fragaria vesca</i>         |
| Unigene34540_All   | 0.76  | 0.01   | -6.25 | <i>Fragaria vesca</i>         |
| Unigene5807_All    | 3.28  | 1.12   | -1.55 | <i>Nelumbo nucifera</i>       |
| Unigene8100_All    | 7.66  | 1.78   | -2.11 | <i>Musa acuminata</i>         |
| <b>GLP</b>         |       |        |       |                               |
| CL2517.Contig3_All | 2.24  | 4.92   | 1.14  | <i>Glycine max</i>            |
| Unigene12866_All   | 72.15 | 174.43 | 1.27  | <i>Atriplex lentiformis</i>   |
| Unigene36054_All   | 0.54  | 3.89   | 2.85  | <i>Vitis vinifera</i>         |
| CL7262.Contig1_All | 6.12  | 13.64  | 1.16  | <i>Beta vulgaris</i>          |
| CL3077.Contig2_All | 1.35  | 0.01   | -7.08 | <i>Prunus mume</i>            |
| CL5206.Contig2_All | 0.95  | 0.33   | -1.53 | <i>Eucalyptus grandis</i>     |
| CL7262.Contig2_All | 5.09  | 2.54   | -1.00 | <i>Beta vulgaris</i>          |
| Unigene15617_All   | 7.7   | 1.76   | -2.13 | <i>Solanum lycopersicum</i>   |
| Unigene29127_All   | 2.23  | 0.98   | -1.19 | <i>Theobroma cacao</i>        |
| <b>CAT</b>         |       |        |       |                               |
| Unigene30829_All   | 0.91  | 0.01   | -6.51 | <i>Phytophthora infestans</i> |
| <b>PEX</b>         |       |        |       |                               |
| CL8785.Contig7_All | 0.01  | 3.83   | 8.58  | <i>Solanum lycopersicum</i>   |
| CL395.Contig12_All | 0.01  | 2.12   | 7.73  | <i>Medicago truncatula</i>    |
| CL8785.Contig5_All | 7.07  | 0.6    | -3.56 | <i>Pyrus x bretschneideri</i> |
| CL1753.Contig2_All | 3.71  | 0.01   | -8.54 | <i>Eucalyptus grandis</i>     |
| <b>Trx</b>         |       |        |       |                               |
| Unigene36570_All   | 0.01  | 0.41   | 5.36  | <i>Theobroma cacao</i>        |
| CL3467.Contig1_All | 3.88  | 9.13   | 1.23  | <i>Vitis vinifera</i>         |
| Unigene6798_All    | 0.33  | 1.47   | 2.16  | <i>Spinacia oleracea</i>      |
| CL2824.Contig1_All | 1.33  | 3.3    | 1.31  | <i>Spinacia oleracea</i>      |
| Unigene25602_All   | 0.55  | 1.12   | 1.03  | <i>Fragaria vesca</i>         |
| Unigene20397_All   | 1.94  | 0.93   | -1.06 | <i>Citrus sinensis</i>        |
| <b>SOD</b>         |       |        |       |                               |
| CL5119.Contig2_All | 0.01  | 0.55   | 5.78  | <i>Spinacia oleracea</i>      |
| CL5754.Contig2_All | 0.79  | 0.01   | -6.30 | <i>Caragana jubata</i>        |
| Unigene39937_All   | 0.61  | 0.01   | -5.93 | <i>Ostreococcus tauri</i>     |

**Table S13.** Differentially expressed genes (DEGs) related to transcription factor in leaves of *A. canescens* after 100 mM NaCl treatment for 6 h. FPKM-CL6 and FPKM-SL6 respectively indicates the FPKM value of a gene in leaves under control condition for 6 h and salt treatment for 6 h. Fold change equals to  $\log_2$  (FPKM-SL6 / FPKM-CL6). Protein refer to the protein encoded by each DEGs.

| Gene ID            | FPKM -CL6 | FPKM -SL6 | Fold change | Homologous species       |
|--------------------|-----------|-----------|-------------|--------------------------|
| <b>WRKY</b>        |           |           |             |                          |
| CL1071.Contig2_All | 95.08     | 0.01      | -13.21      | <i>Spinacia oleracea</i> |
| Unigene3786_All    | 5.24      | 2.34      | -1.16       | <i>Vitis vinifera</i>    |

|                    |       |        |       |                                  |
|--------------------|-------|--------|-------|----------------------------------|
| Unigene1946_All    | 4.76  | 10.67  | 1.16  | <i>Tamarix hispida</i>           |
| Unigene6298_All    | 15.55 | 42.37  | 1.45  | <i>Pyrus x bretschneideri</i>    |
| CL380.Contig2_All  | 3.75  | 12.16  | 1.70  | <i>Nelumbo nucifera</i>          |
| CL7772.Contig1_All | 1.56  | 5.62   | 1.85  | <i>Ricinus communis</i>          |
| Unigene5485_All    | 3.49  | 15.61  | 2.16  | <i>Populus tomentosa</i>         |
| CL3186.Contig1_All | 3.97  | 18.5   | 2.22  | <i>Tamarix hispida</i>           |
| CL3276.Contig2_All | 0.76  | 5.11   | 2.75  | <i>Theobroma cacao</i>           |
| Unigene17677_All   | 1.37  | 9.5    | 2.79  | <i>Panax quinquefolius</i>       |
| CL7561.Contig1_All | 3.1   | 23.45  | 2.92  | <i>Theobroma cacao</i>           |
| Unigene26885_All   | 2.35  | 24.64  | 3.39  | <i>Tamarix hispida</i>           |
| Unigene12295_All   | 2.18  | 23.35  | 3.42  | <i>Vitis vinifera</i>            |
| CL4275.Contig2_All | 2.36  | 48.53  | 4.36  | <i>Vitis vinifera</i>            |
| Unigene11100_All   | 0.26  | 8.04   | 4.95  | <i>Nicotiana tomentosiformis</i> |
| Unigene9476_All    | 0.14  | 10.48  | 6.23  | <i>Vitis vinifera</i>            |
| CL629.Contig1_All  | 0.45  | 122.36 | 8.09  | <i>Vitis vinifera</i>            |
| Unigene1538_All    | 0.01  | 1.91   | 7.58  | <i>Solanum tuberosum</i>         |
| Unigene40205_All   | 0.01  | 3.74   | 8.55  | <i>Theobroma cacao</i>           |
| Unigene12958_All   | 0.01  | 8.68   | 9.76  | <i>Citrus sinensis</i>           |
| Unigene5531_All    | 0.01  | 14.2   | 10.47 | <i>Citrus sinensis</i>           |
| Unigene16243_All   | 0.01  | 20.69  | 11.01 | <i>Theobroma cacao</i>           |
| <b>MYB</b>         |       |        |       |                                  |
| Unigene13756_All   | 3.01  | 0.01   | -8.23 | <i>Malus domestica</i>           |
| Unigene21553_All   | 2.13  | 0.01   | -7.73 | <i>Medicago truncatula</i>       |
| Unigene3069_All    | 24.85 | 0.32   | -6.28 | <i>Theobroma cacao</i>           |
| Unigene12759_All   | 5.29  | 0.33   | -4.00 | <i>Jatropha curcas</i>           |
| Unigene4919_All    | 3.41  | 0.54   | -2.66 | <i>Fragaria vesca</i>            |
| CL422.Contig3_All  | 8.21  | 1.45   | -2.50 | <i>Nelumbo nucifera</i>          |
| Unigene7861_All    | 13.66 | 3.84   | -1.83 | <i>Arachis hypogaea</i>          |
| Unigene7260_All    | 32.16 | 70.13  | 1.12  | <i>Tamarix hispida</i>           |
| CL5601.Contig1_All | 6.15  | 14.17  | 1.20  | <i>Morus notabilis</i>           |
| Unigene11056_All   | 28.1  | 102.02 | 1.86  | <i>Salicornia brachiata</i>      |
| Unigene9243_All    | 2.28  | 9.8    | 2.10  | <i>Theobroma cacao</i>           |
| CL2987.Contig1_All | 1.3   | 6.92   | 2.41  | <i>Ricinus communis</i>          |
| CL6822.Contig3_All | 4.21  | 23.47  | 2.48  | <i>Vitis vinifera</i>            |
| Unigene15334_All   | 0.35  | 2.04   | 2.54  | <i>Nicotiana tomentosiformis</i> |
| CL4970.Contig1_All | 38.77 | 229.8  | 2.57  | <i>Nicotiana tabacum</i>         |
| Unigene15802_All   | 1.04  | 7.75   | 2.90  | <i>Nicotiana sylvestris</i>      |
| Unigene12857_All   | 3.76  | 37.73  | 3.33  | <i>Populus trichocarpa</i>       |
| CL5476.Contig1_All | 0.32  | 3.43   | 3.42  | <i>Jatropha curcas</i>           |
| Unigene7714_All    | 0.63  | 11     | 4.13  | <i>Glycine max</i>               |
| CL5951.Contig4_All | 4.88  | 88.94  | 4.19  | <i>Theobroma cacao</i>           |
| CL7820.Contig3_All | 0.26  | 5.73   | 4.46  | <i>Nelumbo nucifera</i>          |
| Unigene17573_All   | 0.53  | 17.09  | 5.01  | <i>Jatropha curcas</i>           |
| Unigene10405_All   | 0.16  | 17.86  | 6.80  | <i>Theobroma cacao</i>           |

|                    |        |        |       |                                  |
|--------------------|--------|--------|-------|----------------------------------|
| Unigene10098_All   | 0.01   | 2.12   | 7.73  | <i>Medicago truncatula</i>       |
| Unigene35460_All   | 0.01   | 2.3    | 7.85  | <i>Prunus mume</i>               |
| Unigene28181_All   | 0.01   | 3.65   | 8.51  | <i>Theobroma cacao</i>           |
| Unigene403_All     | 0.01   | 8.4    | 9.71  | <i>Theobroma cacao</i>           |
| CL8721.Contig1_All | 0.01   | 9.9    | 9.95  | <i>Populus trichocarpa</i>       |
| CL1223.Contig1_All | 0.01   | 45.2   | 12.14 | <i>Theobroma cacao</i>           |
| CL4043.Contig2_All | 0.01   | 56.27  | 12.46 | <i>Arachis hypogaea</i>          |
| <b>HD-ZIP/bZIP</b> |        |        |       |                                  |
| CL1844.Contig2_All | 0.58   | 26.42  | 5.51  | <i>Populus trichocarpa</i>       |
| CL1962.Contig1_All | 8.48   | 17.27  | 1.03  | <i>Vitis vinifera</i>            |
| CL5048.Contig3_All | 4.33   | 32.82  | 2.92  | <i>Spinacia oleracea</i>         |
| CL6157.Contig1_All | 0.29   | 4.48   | 3.95  | <i>Vitis vinifera</i>            |
| Unigene11050_All   | 0.39   | 0.97   | 1.31  | <i>Nicotiana tomentosiformis</i> |
| Unigene12290_All   | 9.81   | 55.3   | 2.49  | <i>Theobroma cacao</i>           |
| Unigene15839_All   | 0.83   | 19.5   | 4.55  | <i>Prunus mume</i>               |
| Unigene15896_All   | 28.68  | 98.37  | 1.78  | <i>Nicotiana tomentosiformis</i> |
| Unigene1814_All    | 44.08  | 111.52 | 1.34  | <i>Tamarix hispida</i>           |
| Unigene534_All     | 6.23   | 13.61  | 1.13  | <i>Theobroma cacao</i>           |
| Unigene5526_All    | 1.32   | 3.24   | 1.30  | <i>Solanum lycopersicum</i>      |
| Unigene5448_All    | 3.09   | 8.06   | 1.38  | <i>Vitis vinifera</i>            |
| Unigene4320_All    | 12.27  | 36.64  | 1.58  | <i>Vitis vinifera</i>            |
| Unigene9492_All    | 0.29   | 1.01   | 1.80  | <i>Theobroma cacao</i>           |
| Unigene221_All     | 1.41   | 6.67   | 2.24  | <i>Tamarix hispida</i>           |
| Unigene5773_All    | 6.03   | 38.55  | 2.68  | <i>Tamarix hispida</i>           |
| Unigene2090_All    | 22.22  | 1.98   | -3.49 | <i>Solanum tuberosum</i>         |
| Unigene26257_All   | 2.31   | 0.01   | -7.85 | <i>Nelumbo nucifera</i>          |
| Unigene26259_All   | 1.22   | 0.01   | -6.93 | <i>Prunus mume</i>               |
| Unigene23519_All   | 1.05   | 0.01   | -6.71 | <i>Vitis vinifera</i>            |
| Unigene23520_All   | 0.55   | 0.01   | -5.78 | <i>Nicotiana sylvestris</i>      |
| Unigene7774_All    | 7.01   | 0.21   | -5.06 | <i>Vitis vinifera</i>            |
| Unigene36315_All   | 0.01   | 0.46   | 5.52  | <i>Malus domestica</i>           |
| Unigene27471_All   | 0.01   | 1.22   | 6.93  | <i>Nicotiana sylvestris</i>      |
| Unigene16296_All   | 0.01   | 5.43   | 9.08  | <i>Vitis vinifera</i>            |
| Unigene14640_All   | 0.01   | 13.94  | 10.45 | <i>Theobroma cacao</i>           |
| <b>AP2/ERF</b>     |        |        |       |                                  |
| CL3234.Contig1_All | 9.72   | 1.12   | -3.12 | <i>Rumex acetosa</i>             |
| Unigene18547_All   | 1.07   | 13.93  | 3.70  | <i>Theobroma cacao</i>           |
| CL5582.Contig1_All | 1.75   | 13.19  | 2.91  | <i>Citrus sinensis</i>           |
| CL5582.Contig2_All | 0.51   | 5.51   | 3.43  | <i>Pyrus x bretschneideri</i>    |
| CL4440.Contig1_All | 0.85   | 9.07   | 3.42  | <i>Eucalyptus grandis</i>        |
| Unigene18548_All   | 0.63   | 6.13   | 3.28  | <i>Theobroma cacao</i>           |
| Unigene27753_All   | 0.75   | 4.81   | 2.68  | <i>Nicotiana sylvestris</i>      |
| Unigene31276_All   | 0.94   | 5.73   | 2.61  | <i>Pyrus x bretschneideri</i>    |
| Unigene14637_All   | 108.37 | 418.32 | 1.95  | <i>Solanum lycopersicum</i>      |

|                    |        |        |       |                                    |
|--------------------|--------|--------|-------|------------------------------------|
| Unigene14464_All   | 4.43   | 12.89  | 1.54  | <i>Theobroma cacao</i>             |
| Unigene12257_All   | 2.21   | 5.22   | 1.24  | <i>Nelumbo nucifera</i>            |
| Unigene7169_All    | 0.27   | 13.5   | 5.64  | <i>Solanum tuberosum</i>           |
| Unigene3600_All    | 0.25   | 11.35  | 5.50  | <i>Theobroma cacao</i>             |
| CL7480.Contig2_All | 1.69   | 26.86  | 3.99  | <i>Pyrus x bretschneideri</i>      |
| Unigene17627_All   | 3.23   | 17.08  | 2.40  | <i>Nelumbo nucifera</i>            |
| Unigene17680_All   | 142.45 | 450.85 | 1.66  | <i>Vitis vinifera</i>              |
| Unigene5762_All    | 7.42   | 23.05  | 1.64  | <i>Morus notabilis</i>             |
| Unigene6756_All    | 28.34  | 60.26  | 1.09  | <i>Populus trichocarpa</i>         |
| Unigene6706_All    | 2.15   | 25.46  | 3.57  | <i>Tamarix hispida</i>             |
| CL3234.Contig2_All | 20.28  | 44.21  | 1.12  | <i>Rumex acetosa</i>               |
| Unigene1741_All    | 0.01   | 1.89   | 7.56  | <i>Malus domestica</i>             |
| CL1411.Contig1_All | 0.01   | 15.38  | 10.59 | <i>Morus notabilis</i>             |
| Unigene3750_All    | 0.01   | 8.93   | 9.80  | <i>Theobroma cacao</i>             |
| <b>DREB</b>        |        |        |       |                                    |
| Unigene3588_All    | 18.94  | 77.31  | 2.03  | <i>Salicornia brachiata</i>        |
| Unigene15818_All   | 3.99   | 99.39  | 4.64  | <i>Suaeda salsa</i>                |
| CL5907.Contig1_All | 10.64  | 30.24  | 1.51  | <i>Salicornia brachiata</i>        |
| <b>NAC</b>         |        |        |       |                                    |
| Unigene167_All     | 0.01   | 13.85  | 10.44 | <i>Theobroma cacao</i>             |
| Unigene10236_All   | 0.2    | 5.75   | 4.85  | <i>Tamarix hispida</i>             |
| Unigene12962_All   | 0.37   | 7.81   | 4.40  | <i>Pyrus x bretschneideri</i>      |
| CL9208.Contig1_All | 5.63   | 68.23  | 3.60  | <i>Morus notabilis</i>             |
| Unigene12773_All   | 0.87   | 8.2    | 3.24  | <i>Hevea brasiliensis</i>          |
| CL2948.Contig2_All | 5.31   | 29.79  | 2.49  | <i>Theobroma cacao</i>             |
| Unigene31695_All   | 0.38   | 3.15   | 3.05  | <i>Vitis vinifera</i>              |
| Unigene1980_All    | 1.36   | 8.27   | 2.60  | <i>Ricinus communis</i>            |
| Unigene3303_All    | 2.55   | 14.93  | 2.55  | <i>Theobroma cacao</i>             |
| Unigene16456_All   | 1.83   | 10.15  | 2.47  | <i>Suaeda liaotungensis</i>        |
| Unigene18478_All   | 0.62   | 3.17   | 2.35  | <i>Theobroma cacao</i>             |
| Unigene6031_All    | 1.51   | 7.55   | 2.32  | <i>Nelumbo nucifera</i>            |
| Unigene1286_All    | 2.18   | 10.81  | 2.31  | <i>Fragaria vesca subsp. Vesca</i> |
| Unigene3569_All    | 4.1    | 19.92  | 2.28  | <i>Theobroma cacao</i>             |
| Unigene6877_All    | 0.91   | 4.31   | 2.24  | <i>Tamarix hispida</i>             |
| CL6151.Contig2_All | 2.7    | 10.97  | 2.02  | <i>Pyrus x bretschneideri</i>      |
| Unigene4165_All    | 57.15  | 180.53 | 1.66  | <i>Ricinus communis</i>            |
| CL8594.Contig3_All | 49.1   | 134.24 | 1.45  | <i>Suaeda liaotungensis</i>        |
| CL9299.Contig2_All | 6.58   | 16.85  | 1.36  | <i>Jatropha curcas</i>             |
| Unigene15768_All   | 48.34  | 119.49 | 1.31  | <i>Suaeda liaotungensis</i>        |
| Unigene16846_All   | 56.9   | 127.81 | 1.17  | <i>Jatropha curcas</i>             |
| Unigene17664_All   | 12.64  | 28.13  | 1.15  | <i>Phaseolus vulgaris</i>          |
| CL3.Contig1_All    | 2.13   | 4.55   | 1.10  | <i>Theobroma cacao</i>             |
| Unigene17764_All   | 9.73   | 0.01   | -9.93 | <i>Gossypium hirsutum</i>          |
| Unigene8630_All    | 8      | 3.02   | -1.41 | <i>Pyrus x bretschneideri</i>      |

**bHLH**

|                    |       |       |       |                             |
|--------------------|-------|-------|-------|-----------------------------|
| Unigene1766_All    | 0.01  | 29.31 | 11.52 | <i>Nicotiana sylvestris</i> |
| Unigene16064_All   | 0.01  | 25.27 | 11.30 | <i>Prunus mume</i>          |
| Unigene7013_All    | 0.01  | 3.01  | 8.23  | <i>Vitis vinifera</i>       |
| CL9130.Contig1_All | 0.01  | 1.89  | 7.56  | <i>Citrus sinensis</i>      |
| Unigene27074_All   | 0.01  | 1.08  | 6.75  | <i>Fragaria vesca</i>       |
| Unigene10520_All   | 0.01  | 16.83 | 10.72 | <i>Lotus japonicus</i>      |
| Unigene4053_All    | 0.01  | 2.65  | 8.05  | <i>Populus simonii</i>      |
| Unigene16138_All   | 0.38  | 20.66 | 5.76  | <i>Nelumbo nucifera</i>     |
| Unigene17695_All   | 2.64  | 81.65 | 4.95  | <i>Vitis vinifera</i>       |
| Unigene12084_All   | 3.38  | 57.08 | 4.08  | <i>Malus domestica</i>      |
| Unigene11162_All   | 0.27  | 2.94  | 3.44  | <i>Solanum lycopersicum</i> |
| Unigene7417_All    | 0.46  | 2.67  | 2.54  | <i>Vitis vinifera</i>       |
| CL9504.Contig1_All | 3.43  | 16.48 | 2.26  | <i>Vitis vinifera</i>       |
| Unigene17775_All   | 3.18  | 15.14 | 2.25  | <i>Malus domestica</i>      |
| Unigene17676_All   | 1.33  | 6.14  | 2.21  | <i>Fragaria vesca</i>       |
| Unigene38100_All   | 5.12  | 13.72 | 1.42  | <i>Nelumbo nucifera</i>     |
| Unigene14971_All   | 29.74 | 74.03 | 1.32  | <i>Vitis vinifera</i>       |
| Unigene3_All       | 2.28  | 5.28  | 1.21  | <i>Cicer arietinum</i>      |
| Unigene11068_All   | 6.78  | 23.81 | 1.81  | <i>Theobroma cacao</i>      |
| Unigene3415_All    | 8.12  | 17.96 | 1.15  | <i>Vitis vinifera</i>       |
| CL6102.Contig2_All | 15.59 | 33.44 | 1.10  | <i>Vitis vinifera</i>       |
| CL7924.Contig1_All | 5.84  | 0.01  | -9.19 | <i>Vitis vinifera</i>       |
| Unigene8694_All    | 49.65 | 0.49  | -6.66 | <i>Vitis vinifera</i>       |
| CL3710.Contig1_All | 2.67  | 0.42  | -2.67 | <i>Prunus mume</i>          |
| CL7707.Contig2_All | 4.07  | 0.34  | -3.58 | <i>Theobroma cacao</i>      |
| Unigene27729_All   | 34.75 | 17.37 | -1.00 | <i>Theobroma cacao</i>      |

**MADS-box**

|                    |       |        |       |                                  |
|--------------------|-------|--------|-------|----------------------------------|
| Unigene24561_All   | 0.01  | 10.08  | 9.98  | <i>Vitis vinifera</i>            |
| Unigene9423_All    | 0.01  | 7.42   | 9.54  | <i>Nicotiana tomentosiformis</i> |
| CL5411.Contig5_All | 0.01  | 19.73  | 10.95 | <i>Phoenix dactylifera</i>       |
| CL6533.Contig2_All | 0.18  | 8.45   | 5.55  | <i>Prunus mume</i>               |
| CL2234.Contig4_All | 0.69  | 16.8   | 4.61  | <i>Gossypium hirsutum</i>        |
| CL1445.Contig5_All | 1.98  | 7.67   | 1.95  | <i>Beta vulgaris</i>             |
| CL1478.Contig1_All | 4.55  | 0.01   | -8.83 | <i>Nelumbo nucifera</i>          |
| CL7398.Contig3_All | 0.01  | 40.5   | 11.98 | <i>Theobroma cacao</i>           |
| Unigene8363_All    | 0.1   | 2.82   | 4.82  | <i>Theobroma cacao</i>           |
| CL7870.Contig2_All | 1.14  | 5.91   | 2.37  | <i>Eucalyptus grandis</i>        |
| CL6093.Contig1_All | 3.42  | 9.89   | 1.53  | <i>Theobroma cacao</i>           |
| CL3061.Contig2_All | 4.47  | 156.33 | 5.13  | <i>Theobroma cacao</i>           |
| CL1153.Contig2_All | 10.83 | 23.78  | 1.13  | <i>Vitis vinifera</i>            |
| CL1623.Contig2_All | 8.52  | 20.9   | 1.29  | <i>Pyrus x bretschneideri</i>    |
| CL1816.Contig1_All | 3.71  | 10.79  | 1.54  | <i>Theobroma cacao</i>           |
| CL213.Contig2_All  | 0.56  | 12.78  | 4.51  | <i>Brassica rapa</i>             |

|                    |       |        |      |                                  |
|--------------------|-------|--------|------|----------------------------------|
| CL2494.Contig2_All | 2.62  | 6.97   | 1.41 | <i>Populus trichocarpa</i>       |
| CL2555.Contig8_All | 0.97  | 4.14   | 2.09 | <i>Nicotiana sylvestris</i>      |
| CL2680.Contig2_All | 2.34  | 5.74   | 1.29 | <i>[Pyrus x bretschneideri]</i>  |
| CL2784.Contig2_All | 2.01  | 8.77   | 2.13 | <i>Solanum lycopersicum</i>      |
| CL2904.Contig7_All | 7.1   | 17.12  | 1.27 | <i>Citrus sinensis</i>           |
| CL3061.Contig1_All | 1.98  | 46.4   | 4.55 | <i>Theobroma cacao</i>           |
| CL3811.Contig4_All | 8.97  | 75.68  | 3.08 | <i>Nicotiana sylvestris</i>      |
| CL4249.Contig1_All | 21.42 | 45.72  | 1.09 | <i>Populus trichocarpa</i>       |
| CL4800.Contig1_All | 4     | 8.35   | 1.06 | <i>Theobroma cacao</i>           |
| CL4998.Contig3_All | 3.1   | 11.4   | 1.88 | <i>Nicotiana tomentosiformis</i> |
| CL5844.Contig1_All | 5.29  | 13.97  | 1.40 | <i>Theobroma cacao</i>           |
| CL6239.Contig1_All | 6.1   | 38.75  | 2.67 | <i>Glycine max</i>               |
| CL647.Contig3_All  | 3.28  | 12.98  | 1.98 | <i>Nelumbo nucifera</i>          |
| CL6754.Contig1_All | 2.15  | 4.92   | 1.19 | <i>Theobroma cacao</i>           |
| CL6912.Contig1_All | 0.44  | 17.36  | 5.30 | <i>Citrus sinensis</i>           |
| CL7175.Contig1_All | 9.82  | 46.73  | 2.25 | <i>Nelumbo nucifera</i>          |
| CL7205.Contig2_All | 5.78  | 13.94  | 1.27 | <i>Beta vulgaris</i>             |
| CL8054.Contig2_All | 5.22  | 21.17  | 2.02 | <i>Nicotiana tomentosiformis</i> |
| CL8626.Contig2_All | 0.01  | 9.85   | 9.94 | <i>Nelumbo nucifera</i>          |
| Unigene10003_All   | 7.51  | 17.24  | 1.20 | <i>Citrus sinensis</i>           |
| Unigene10303_All   | 1.37  | 7.42   | 2.44 | <i>Theobroma cacao</i>           |
| Unigene10320_All   | 2.26  | 8.11   | 1.84 | <i>Theobroma cacao</i>           |
| Unigene10801_All   | 0.15  | 4.36   | 4.86 | <i>Solanum tuberosum</i>         |
| Unigene11037_All   | 9.29  | 19.5   | 1.07 | <i>Silene latifolia</i>          |
| Unigene11889_All   | 0.15  | 6.86   | 5.52 | <i>Ricinus communis</i>          |
| Unigene12085_All   | 5.43  | 24.48  | 2.17 | <i>Ricinus communis</i>          |
| Unigene1234_All    | 1.11  | 33.6   | 4.92 | <i>Populus trichocarpa</i>       |
| Unigene18007_All   | 0.47  | 24.56  | 5.71 | <i>Nicotiana sylvestris</i>      |
| Unigene1480_All    | 3.49  | 108.54 | 4.96 | <i>Eucalyptus grandis</i>        |
| Unigene6975_All    | 1.76  | 50.95  | 4.86 | <i>Morus notabilis</i>           |
| Unigene15982_All   | 2.78  | 27.46  | 3.30 | <i>Populus trichocarpa</i>       |
| Unigene35464_All   | 0.56  | 5.3    | 3.24 | <i>Solanum lycopersicum</i>      |
| Unigene16195_All   | 1.17  | 8.86   | 2.92 | <i>Pyrus x bretschneideri</i>    |
| Unigene31278_All   | 2.47  | 18.17  | 2.88 | <i>Glycine max</i>               |
| Unigene251_All     | 0.48  | 3.02   | 2.65 | <i>Medicago truncatula</i>       |
| Unigene1451_All    | 6.66  | 40.61  | 2.61 | <i>Vitis vinifera</i>            |
| Unigene17988_All   | 1.82  | 10.65  | 2.55 | <i>Vitis vinifera</i>            |
| Unigene461_All     | 0.49  | 2.63   | 2.42 | <i>Nelumbo nucifera</i>          |
| Unigene12834_All   | 4.85  | 25.1   | 2.37 | <i>Vitis vinifera</i>            |
| Unigene3903_All    | 0.9   | 3.78   | 2.07 | <i>Nelumbo nucifera</i>          |
| Unigene17630_All   | 10.69 | 36.66  | 1.78 | <i>Populus trichocarpa</i>       |
| Unigene2389_All    | 6.34  | 16.72  | 1.40 | <i>Vitis vinifera</i>            |
| Unigene18146_All   | 3.99  | 9.98   | 1.32 | <i>Vitis vinifera</i>            |
| Unigene6232_All    | 9.14  | 22.84  | 1.32 | <i>Ricinus communis</i>          |

|                    |        |        |        |                                   |
|--------------------|--------|--------|--------|-----------------------------------|
| Unigene16891_All   | 10.97  | 27.24  | 1.31   | <i>Prunus mume</i>                |
| Unigene2542_All    | 15.99  | 37.47  | 1.23   | <i>Ricinus communis</i>           |
| Unigene8602_All    | 5      | 11.54  | 1.21   | <i>Nelumbo nucifera</i>           |
| Unigene8802_All    | 29.46  | 65.84  | 1.16   | <i>Vitis vinifera</i>             |
| Unigene2405_All    | 4.5    | 9.95   | 1.14   | <i>Eucalyptus grandis</i>         |
| Unigene8557_All    | 139.78 | 307.85 | 1.14   | <i>Vitis vinifera</i>             |
| Unigene13066_All   | 29.19  | 63.32  | 1.12   | <i>Populus trichocarpa</i>        |
| Unigene5790_All    | 3.25   | 7.03   | 1.11   | <i>Theobroma cacao</i>            |
| Unigene7787_All    | 4.56   | 9.77   | 1.10   | <i>Theobroma cacao</i>            |
| Unigene17840_All   | 10.01  | 21.3   | 1.09   | <i>Morus notabilis</i>            |
| Unigene12718_All   | 46.58  | 95.29  | 1.03   | <i>Morus notabilis</i>            |
| Unigene8812_All    | 47.64  | 23.78  | -1.00  | <i>Nicotiana glauca</i>           |
| Unigene16749_All   | 30.3   | 14.52  | -1.06  | <i>Theobroma cacao</i>            |
| CL6005.Contig2_All | 5      | 2.15   | -1.22  | <i>Theobroma cacao</i>            |
| Unigene7406_All    | 7.88   | 2.84   | -1.47  | <i>Nelumbo nucifera</i>           |
| Unigene9369_All    | 6.72   | 2.24   | -1.58  | <i>Vitis vinifera</i>             |
| Unigene5811_All    | 11.02  | 2.8    | -1.98  | <i>Prunus mume</i>                |
| Unigene9484_All    | 4.11   | 0.96   | -2.10  | <i>Vitis vinifera</i>             |
| CL7243.Contig2_All | 10.64  | 1.43   | -2.90  | <i>Nelumbo nucifera</i>           |
| CL6715.Contig1_All | 7.04   | 0.9    | -2.97  | <i>Brassica rapa</i>              |
| Unigene12475_All   | 7.22   | 0.71   | -3.35  | <i>Medicago truncatula</i>        |
| Unigene18264_All   | 20.94  | 1.99   | -3.40  | <i>Populus trichocarpa</i>        |
| Unigene9454_All    | 3.86   | 0.01   | -8.59  | <i>Amaranthus hypochondriacus</i> |
| CL6690.Contig2_All | 77.15  | 0.01   | -12.91 | <i>Vitis vinifera</i>             |
| CL5054.Contig2_All | 9.43   | 2.11   | -2.16  | <i>Cicer arietinum</i>            |
| CL5550.Contig2_All | 29.41  | 6.7    | -2.13  | <i>Glycine max</i>                |
| CL37.Contig3_All   | 1.76   | 0.01   | -7.46  | <i>Populus trichocarpa</i>        |
| CL4442.Contig2_All | 17.09  | 3.61   | -2.24  | <i>Vitis vinifera</i>             |
| CL4536.Contig2_All | 35.14  | 0.01   | -11.78 | <i>Solanum lycopersicum</i>       |
| CL469.Contig1_All  | 6.71   | 0.01   | -9.39  | <i>Vitis vinifera</i>             |
| CL2069.Contig1_All | 21.5   | 1.01   | -4.41  | <i>Nelumbo nucifera</i>           |
| CL9583.Contig2_All | 10.91  | 0.21   | -5.70  | <i>Saruma henryi</i>              |
| Unigene7539_All    | 4.14   | 0.11   | -5.23  | <i>Theobroma cacao</i>            |
| CL5483.Contig3_All | 5.98   | 0.32   | -4.22  | <i>Theobroma cacao</i>            |
| Unigene12010_All   | 41.16  | 10.94  | -1.91  | <i>Prunus mume</i>                |
| CL5689.Contig2_All | 14.6   | 4.12   | -1.83  | <i>Theobroma cacao</i>            |
| Unigene7177_All    | 13.23  | 4.34   | -1.61  | <i>Vitis vinifera</i>             |
| CL6461.Contig1_All | 8.74   | 3.17   | -1.46  | <i>Theobroma cacao</i>            |
| CL2153.Contig1_All | 3.2    | 0.54   | -2.57  | <i>Theobroma cacao</i>            |
| <b>HSF</b>         |        |        |        |                                   |
| CL3372.Contig2_All | 0.01   | 26.48  | 11.37  | <i>Cucumis melo</i>               |
| CL7682.Contig2_All | 0.01   | 9.88   | 9.95   | <i>Vitis vinifera</i>             |
| CL1745.Contig1_All | 5      | 15.62  | 1.64   | <i>Populus trichocarpa</i>        |

|                    |        |       |       |                                  |
|--------------------|--------|-------|-------|----------------------------------|
| CL1986.Contig1_All | 0.3    | 3.37  | 3.49  | <i>Capparis spinosa</i>          |
| CL2066.Contig3_All | 4.08   | 26.94 | 2.72  | <i>Citrus sinensis</i>           |
| CL2779.Contig1_All | 3.8    | 7.66  | 1.01  | <i>Vitis vinifera</i>            |
| CL3494.Contig2_All | 13.4   | 42.15 | 1.65  | <i>Oxybasis rubra</i>            |
| CL4848.Contig2_All | 1.95   | 8.28  | 2.09  | <i>Theobroma cacao</i>           |
| CL5651.Contig2_All | 7.09   | 26.27 | 1.89  | <i>Pyrus x bretschneideri</i>    |
| CL6191.Contig2_All | 1.19   | 4.23  | 1.83  | <i>Chenopodium album</i>         |
| CL6546.Contig6_All | 2.65   | 6.27  | 1.24  | <i>Theobroma cacao</i>           |
| CL683.Contig2_All  | 0.12   | 1.85  | 3.95  | <i>Citrus sinensis</i>           |
| CL7113.Contig1_All | 1.44   | 13.08 | 3.18  | <i>Cucumis melo</i>              |
| CL8208.Contig1_All | 1.38   | 13.54 | 3.29  | <i>Vitis vinifera</i>            |
| Unigene10400_All   | 4.86   | 15.94 | 1.71  | <i>Medicago truncatula</i>       |
| Unigene12840_All   | 0.52   | 12.14 | 4.55  | <i>Nicotiana tomentosiformis</i> |
| Unigene8347_All    | 0.16   | 2.03  | 3.67  | <i>Vitis vinifera</i>            |
| Unigene5261_All    | 2.89   | 34.42 | 3.57  | <i>Pyrus x bretschneideri</i>    |
| Unigene18326_All   | 3.01   | 26.35 | 3.13  | <i>Nicotiana tomentosiformis</i> |
| Unigene3969_All    | 2.42   | 17.48 | 2.85  | <i>Beta vulgaris</i>             |
| Unigene25729_All   | 4.32   | 17.55 | 2.02  | <i>Theobroma cacao</i>           |
| Unigene508_All     | 2.57   | 9.36  | 1.86  | <i>Glycine max</i>               |
| Unigene4752_All    | 4.28   | 14.78 | 1.79  | <i>Nelumbo nucifera</i>          |
| Unigene8975_All    | 12.37  | 36.73 | 1.57  | <i>Pyrus x bretschneideri</i>    |
| CL3871.Contig2_All | 1.59   | 0.01  | -7.31 | <i>Theobroma cacao</i>           |
| Unigene14311_All   | 15.82  | 7.42  | -1.09 | <i>Fragaria vesca</i>            |
| Unigene18009_All   | 7.25   | 2.93  | -1.31 | <i>Vitis vinifera</i>            |
| Unigene16844_All   | 208.08 | 64.29 | -1.69 | <i>Spinacia oleracea</i>         |
| Unigene5364_All    | 158.49 | 41.15 | -1.95 | <i>Solanum lycopersicum</i>      |
| CL4720.Contig2_All | 4.38   | 1.11  | -1.98 | <i>Ricinus communis</i>          |
| CL5758.Contig3_All | 2.31   | 0.17  | -3.76 | <i>Nicotiana tomentosiformis</i> |
| Unigene11441_All   | 61.05  | 13.85 | -2.14 | <i>Nelumbo nucifera</i>          |

**Table S14.** Differentially expressed genes (DEGs) related to transcription factor in roots of *A. canescens* after 100 mM NaCl treatment for 6 h. FPKM-CR6 and FPKM-SR6 respectively indicates the FPKM value of a gene in roots under control condition for 6 h and salt treatment for 6 h. Fold change equals to  $\log_2$  (FPKM-SR6 / FPKM-CR6). Protein refer to the protein encoded by each DEGs.

| Gene ID            | FPKM-CR6 | FPKM-SR6 | Fold change | Homologous species               |
|--------------------|----------|----------|-------------|----------------------------------|
| <b>WRKY</b>        |          |          |             |                                  |
| CL1071.Contig2_All | 193.33   | 51.73    | -1.90       | <i>Spinacia oleracea</i>         |
| CL2815.Contig2_All | 275.99   | 135.11   | -1.03       | <i>Citrus sinensis</i>           |
| CL3186.Contig2_All | 13.02    | 5.62     | -1.21       | <i>Tamarix hispida</i>           |
| CL3276.Contig1_All | 10.67    | 3.95     | -1.43       | <i>Nicotiana tomentosiformis</i> |
| CL380.Contig2_All  | 46.73    | 2.44     | -4.26       | <i>Nelumbo nucifera</i>          |
| CL3907.Contig1_All | 215.52   | 41.06    | -2.39       | <i>Spinacia oleracea</i>         |



|                    |       |       |        |                                  |
|--------------------|-------|-------|--------|----------------------------------|
| CL408.Contig2_All  | 81.79 | 13.39 | -2.61  | <i>Nelumbo nucifera</i>          |
| CL4275.Contig2_All | 37.26 | 2.05  | -4.18  | <i>Vitis vinifera</i>            |
| CL492.Contig2_All  | 28.69 | 3.01  | -3.25  | <i>Tamarix hispida</i>           |
| CL629.Contig1_All  | 71.2  | 0.57  | -6.96  | <i>Vitis vinifera</i>            |
| CL7561.Contig1_All | 29.45 | 3.12  | -3.24  | <i>Theobroma cacao</i>           |
| CL7772.Contig1_All | 4.51  | 2.07  | -1.12  | <i>Ricinus communis</i>          |
| Unigene11100_All   | 6.2   | 0.06  | -6.69  | <i>Nicotiana tomentosiformis</i> |
| Unigene12295_All   | 20.65 | 2.15  | -3.26  | <i>Vitis vinifera</i>            |
| Unigene1538_All    | 2.99  | 0.01  | -8.22  | <i>Solanum tuberosum</i>         |
| Unigene16243_All   | 14.61 | 0.01  | -10.51 | <i>Theobroma cacao</i>           |
| Unigene17677_All   | 9.84  | 0.72  | -3.77  | <i>Panax quinquefolius</i>       |
| Unigene17816_All   | 43.46 | 15.21 | -1.51  | <i>Nelumbo nucifera</i>          |
| Unigene1946_All    | 10.46 | 3.87  | -1.43  | <i>Tamarix hispida</i>           |
| Unigene26885_All   | 38.67 | 7.52  | -2.36  | <i>Tamarix hispida</i>           |
| Unigene30487_All   | 3.52  | 0.01  | -8.46  | <i>Glycine max</i>               |
| Unigene3253_All    | 47.98 | 21.01 | -1.19  | <i>Vitis aestivalis</i>          |
| Unigene3615_All    | 10.12 | 0.48  | -4.40  | <i>Theobroma cacao</i>           |
| Unigene3697_All    | 13.79 | 1.23  | -3.49  | <i>Nelumbo nucifera</i>          |
| Unigene3698_All    | 62.78 | 13.46 | -2.22  | <i>Theobroma cacao</i>           |
| Unigene3898_All    | 4.08  | 0.53  | -2.94  | <i>Nelumbo nucifera</i>          |
| Unigene40205_All   | 9     | 0.01  | -9.81  | <i>Theobroma cacao</i>           |
| Unigene5485_All    | 20.74 | 2.83  | -2.87  | <i>Populus tomentosa</i>         |
| Unigene553_All     | 8.48  | 1.5   | -2.50  | <i>Jatropha curcas</i>           |
| Unigene5531_All    | 10.01 | 0.01  | -9.97  | <i>Citrus sinensis</i>           |
| Unigene6298_All    | 45.67 | 16.8  | -1.44  | <i>Pyrus x bretschneideri</i>    |
| Unigene9476_All    | 10.66 | 0.07  | -7.25  | <i>Vitis vinifera</i>            |
| Unigene3786_All    | 1.58  | 4.68  | 1.57   | <i>Vitis vinifera</i>            |

# **MYB**

|                    |        |       |        |                                    |
|--------------------|--------|-------|--------|------------------------------------|
| CL4105.Contig2_All | 8.4    | 17.9  | 1.09   | <i>Salicornia brachiata</i>        |
| Unigene4919_All    | 1.32   | 5.55  | 2.07   | <i>Fragaria vesca subsp. vesca</i> |
| Unigene7861_All    | 2.66   | 18.14 | 2.77   | <i>Arachis hypogaea</i>            |
| Unigene12759_All   | 0.43   | 8.59  | 4.32   | <i>Jatropha curcas</i>             |
| Unigene3069_All    | 0.46   | 26.41 | 5.84   | <i>Theobroma cacao</i>             |
| CL1223.Contig2_All | 37.56  | 3.31  | -3.50  | <i>Vitis vinifera</i>              |
| CL2741.Contig4_All | 26.5   | 8.17  | -1.70  | <i>Ricinus communis</i>            |
| CL2987.Contig1_All | 8.68   | 1.43  | -2.60  | <i>Ricinus communis</i>            |
| CL4043.Contig2_All | 34.36  | 0.01  | -11.75 | <i>Arachis hypogaea</i>            |
| CL422.Contig3_All  | 5.39   | 0.01  | -9.07  | <i>Nelumbo nucifera</i>            |
| CL4970.Contig1_All | 405.42 | 19.4  | -4.39  | <i>Nicotiana tabacum</i>           |
| CL5105.Contig2_All | 4.01   | 0.6   | -2.74  | <i>Populus trichocarpa</i>         |
| CL5476.Contig1_All | 4.93   | 0.41  | -3.59  | <i>Jatropha curcas</i>             |
| CL5601.Contig1_All | 15.42  | 2.37  | -2.70  | <i>Morus notabilis</i>             |
| CL5951.Contig3_All | 7.1    | 0.01  | -9.47  | <i>Quercus suber</i>               |
| CL7820.Contig1_All | 3.38   | 0.01  | -8.40  | <i>Nelumbo nucifera</i>            |

|                    |        |       |       |                                  |
|--------------------|--------|-------|-------|----------------------------------|
| CL8721.Contig1_All | 7.89   | 0.01  | -9.62 | <i>Populus trichocarpa</i>       |
| Unigene10405_All   | 18.19  | 0.15  | -6.92 | <i>Theobroma cacao</i>           |
| Unigene7714_All    | 8.91   | 0.01  | -9.80 | <i>Glycine max</i>               |
| Unigene41594_All   | 5.92   | 0.01  | -9.21 | <i>Pyrus x bretschneideri</i>    |
| Unigene28181_All   | 4.26   | 0.01  | -8.73 | <i>Theobroma cacao</i>           |
| Unigene403_All     | 3.04   | 0.01  | -8.25 | <i>Theobroma cacao</i>           |
| Unigene17573_All   | 5.3    | 0.1   | -5.73 | <i>Jatropha curcas</i>           |
| Unigene15334_All   | 3.44   | 0.13  | -4.73 | <i>Nicotiana tomentosiformis</i> |
| Unigene12857_All   | 34.33  | 3.3   | -3.38 | <i>Populus trichocarpa</i>       |
| Unigene15802_All   | 6.64   | 1.42  | -2.23 | <i>Nicotiana sylvestris</i>      |
| Unigene9243_All    | 10.18  | 2.35  | -2.12 | <i>Theobroma cacao</i>           |
| Unigene11056_All   | 130.36 | 38.37 | -1.76 | <i>Salicornia brachiata</i>      |
| Unigene10959_All   | 5.48   | 1.7   | -1.69 | <i>Theobroma cacao</i>           |
| Unigene7260_All    | 64.23  | 23.78 | -1.43 | <i>Tamarix hispida</i>           |
| Unigene13756_All   | 0.01   | 2.98  | 8.22  | <i>Malus domestica</i>           |

# bZIP

|                    |        |       |        |                                  |
|--------------------|--------|-------|--------|----------------------------------|
| Unigene14640_All   | 14.68  | 0.01  | -10.52 | <i>Theobroma cacao</i>           |
| CL1844.Contig2_All | 57.99  | 2.42  | -4.58  | <i>Populus trichocarpa</i>       |
| Unigene221_All     | 5.59   | 1.2   | -2.22  | <i>Tamarix hispida</i>           |
| Unigene1814_All    | 136.55 | 31.95 | -2.10  | <i>Tamarix hispida</i>           |
| Unigene5773_All    | 19.62  | 4.93  | -1.99  | <i>Tamarix hispida</i>           |
| CL4915.Contig1_All | 33.51  | 10.54 | -1.67  | <i>Tamarix hispida</i>           |
| CL6106.Contig3_All | 23.93  | 10.49 | -1.19  | <i>Morus notabilis</i>           |
| Unigene534_All     | 14.84  | 5.89  | -1.33  | <i>Theobroma cacao</i>           |
| CL5048.Contig3_All | 33.48  | 3.51  | -3.25  | <i>Spinacia oleracea</i>         |
| Unigene12323_All   | 1.45   | 0.01  | -7.18  | <i>Prunus mume</i>               |
| Unigene15896_All   | 74.4   | 33.19 | -1.16  | <i>Nicotiana tomentosiformis</i> |
| Unigene27471_All   | 1.4    | 0.01  | -7.13  | <i>Nicotiana sylvestris</i>      |
| Unigene4117_All    | 4.14   | 1.38  | -1.58  | <i>Theobroma cacao</i>           |
| Unigene9492_All    | 0.75   | 0.01  | -6.23  | <i>Theobroma cacao</i>           |
| CL1962.Contig1_All | 21.71  | 6.4   | -1.76  | <i>Vitis vinifera</i>            |
| CL6157.Contig1_All | 3.15   | 0.52  | -2.60  | <i>Vitis vinifera</i>            |
| Unigene11050_All   | 2.28   | 0.01  | -7.83  | <i>Nicotiana tomentosiformis</i> |
| Unigene12290_All   | 37.37  | 4.4   | -3.09  | <i>Theobroma cacao</i>           |
| Unigene145_All     | 92.26  | 40.9  | -1.17  | <i>Vitis vinifera</i>            |
| Unigene14582_All   | 8.18   | 2.19  | -1.90  | <i>Vitis vinifera</i>            |
| Unigene15839_All   | 18.65  | 1.15  | -4.02  | <i>Prunus mume</i>               |
| Unigene16296_All   | 5.24   | 0.01  | -9.03  | <i>Vitis vinifera</i>            |
| Unigene3305_All    | 7.23   | 3.42  | -1.08  | <i>Mirabilis jalapa</i>          |
| Unigene4320_All    | 35.73  | 13.92 | -1.36  | <i>Vitis vinifera</i>            |
| Unigene5448_All    | 15.52  | 2.68  | -2.53  | <i>Vitis vinifera</i>            |
| Unigene2090_All    | 2.06   | 36.08 | 4.13   | <i>Solanum tuberosum</i>         |
| Unigene26259_All   | 0.24   | 2.1   | 3.13   | <i>Prunus mume</i>               |
| Unigene7774_All    | 0.08   | 11.27 | 7.14   | <i>Vitis vinifera</i>            |

|                    |        |        |        |                                    |
|--------------------|--------|--------|--------|------------------------------------|
| Unigene23519_All   | 0.01   | 1      | 6.64   | <i>Vitis vinifera</i>              |
| Unigene23520_All   | 0.01   | 1.04   | 6.70   | <i>Nicotiana sylvestris</i>        |
| Unigene26257_All   | 0.01   | 3.29   | 8.36   | <i>Nelumbo nucifera</i>            |
| <b>AP2/ERF</b>     |        |        |        |                                    |
| CL1411.Contig1_All | 21.33  | 0.01   | -11.06 | <i>Morus notabilis</i>             |
| CL2241.Contig1_All | 46.94  | 16.1   | -1.54  | <i>Tamarix hispida</i>             |
| CL3234.Contig2_All | 42.86  | 15.97  | -1.42  | <i>Rumex acetosa</i>               |
| CL4440.Contig1_All | 6.15   | 1.37   | -2.17  | <i>Eucalyptus grandis</i>          |
| CL5582.Contig1_All | 28.02  | 3.29   | -3.09  | <i>Citrus sinensis</i>             |
| CL5907.Contig2_All | 6.35   | 0.01   | -9.31  | <i>Catharanthus roseus</i>         |
| CL7480.Contig2_All | 11.38  | 2.9    | -1.97  | <i>Pyrus x bretschneideri</i>      |
| Unigene10412_All   | 0.89   | 0.01   | -6.48  | <i>Prunus mume</i>                 |
| Unigene12257_All   | 7.84   | 1.56   | -2.33  | <i>Nelumbo nucifera</i>            |
| Unigene13939_All   | 11.3   | 4.19   | -1.43  | <i>Diospyros kaki</i>              |
| Unigene14464_All   | 12.68  | 3.85   | -1.72  | <i>Theobroma cacao</i>             |
| Unigene14637_All   | 370.12 | 80.97  | -2.19  | <i>Solanum lycopersicum</i>        |
| Unigene15713_All   | 223.32 | 47.23  | -2.24  | <i>Tamarix hispida</i>             |
| Unigene1741_All    | 1.39   | 0.01   | -7.12  | <i>Malus domestica</i>             |
| Unigene17627_All   | 22.52  | 3.71   | -2.60  | <i>Nelumbo nucifera</i>            |
| Unigene17680_All   | 422.19 | 144.85 | -1.54  | <i>Vitis vinifera</i>              |
| Unigene18392_All   | 4.67   | 0.17   | -4.78  | <i>Nelumbo nucifera</i>            |
| Unigene18547_All   | 16.83  | 0.69   | -4.61  | <i>Theobroma cacao</i>             |
| Unigene18548_All   | 3.84   | 0.01   | -8.58  | <i>Theobroma cacao</i>             |
| Unigene27753_All   | 6.2    | 1.04   | -2.58  | <i>Nicotiana sylvestris</i>        |
| Unigene31276_All   | 22.69  | 0.01   | -11.15 | <i>Pyrus x bretschneideri</i>      |
| Unigene32394_All   | 1.96   | 0.01   | -7.61  | <i>Theobroma cacao</i>             |
| Unigene3600_All    | 12.59  | 0.01   | -10.30 | <i>Theobroma cacao</i>             |
| Unigene3750_All    | 9.14   | 0.05   | -7.51  | <i>Theobroma cacao</i>             |
| Unigene5762_All    | 8.6    | 4.09   | -1.07  | <i>Morus notabilis</i>             |
| Unigene5913_All    | 47.39  | 16.21  | -1.55  | <i>Solanum lycopersicum</i>        |
| Unigene6706_All    | 19.66  | 2.23   | -3.14  | <i>Tamarix hispida</i>             |
| Unigene6873_All    | 290.42 | 133.55 | -1.12  | <i>Fragaria vesca subsp. vesca</i> |
| Unigene7169_All    | 12.55  | 0.39   | -5.01  | <i>Solanum tuberosum</i>           |
| <b>DREB</b>        |        |        |        |                                    |
| Unigene15818_All   | 41.62  | 1.48   | -4.81  | <i>Suaeda salsa</i>                |
| CL5907.Contig4_All | 19.08  | 3.28   | -2.54  | <i>Salicornia brachiata</i>        |
| Unigene3588_All    | 91.22  | 22.65  | -2.01  | <i>Salicornia brachiata</i>        |
| CL6518.Contig1_All | 2.89   | 0.18   | -4.01  | <i>Corchorus olitorius</i>         |
| <b>NAC</b>         |        |        |        |                                    |
| CL2948.Contig1_All | 4.65   | 0.45   | -3.37  | <i>Theobroma cacao</i>             |
| CL3.Contig1_All    | 3.62   | 1.22   | -1.57  | <i>Theobroma cacao</i>             |
| CL4235.Contig2_All | 1.66   | 0.01   | -7.38  | <i>Solanum tuberosum</i>           |
| CL6151.Contig1_All | 8.63   | 2.47   | -1.80  | <i>Malus domestica</i>             |

|                    |       |       |        |                                    |
|--------------------|-------|-------|--------|------------------------------------|
| CL7605.Contig3_All | 27.04 | 10.42 | -1.38  | <i>Nelumbo nucifera</i>            |
| CL9208.Contig1_All | 27.69 | 3.07  | -3.17  | <i>Morus notabilis</i>             |
| CL9299.Contig2_All | 15.24 | 7     | -1.12  | <i>Jatropha curcas</i>             |
| Unigene10179_All   | 81.86 | 33.62 | -1.28  | <i>Suaeda liaotungensis</i>        |
| Unigene12773_All   | 7.12  | 0.76  | -3.23  | <i>Hevea brasiliensis</i>          |
| Unigene1286_All    | 12.05 | 0.77  | -3.97  | <i>Fragaria vesca subsp. vesca</i> |
| Unigene12962_All   | 4.01  | 0.71  | -2.50  | <i>Pyrus x bretschneideri</i>      |
| Unigene16456_All   | 5.67  | 1.58  | -1.84  | <i>Suaeda liaotungensis</i>        |
| Unigene167_All     | 17.67 | 0.01  | -10.79 | <i>Theobroma cacao</i>             |
| Unigene17664_All   | 33.32 | 9.1   | -1.87  | <i>Phaseolus vulgaris</i>          |
| Unigene18464_All   | 8.03  | 2.85  | -1.49  | <i>Nelumbo nucifera</i>            |
| Unigene18478_All   | 2.05  | 0.22  | -3.22  | <i>Theobroma cacao</i>             |
| Unigene31695_All   | 3.69  | 0.91  | -2.02  | <i>Vitis vinifera</i>              |
| Unigene3303_All    | 7.59  | 1.35  | -2.49  | <i>Theobroma cacao</i>             |
| Unigene34120_All   | 7.21  | 0.56  | -3.69  | <i>Prunus mume</i>                 |
| Unigene3569_All    | 10.4  | 2.41  | -2.11  | <i>Theobroma cacao</i>             |
| Unigene6031_All    | 8.97  | 2.3   | -1.96  | <i>Nelumbo nucifera</i>            |
| Unigene6877_All    | 5.04  | 0.87  | -2.53  | <i>Tamarix hispida</i>             |
| Unigene17764_All   | 0.06  | 13.04 | 7.76   | <i>Gossypium hirsutum</i>          |

#### **bHLH**

|                    |       |       |        |                                    |
|--------------------|-------|-------|--------|------------------------------------|
| CL7924.Contig1_All | 0.01  | 4.38  | 8.77   | <i>Vitis vinifera</i>              |
| CL3377.Contig1_All | 4.03  | 13.71 | 1.77   | <i>Vitis vinifera</i>              |
| CL3710.Contig3_All | 2.99  | 11.1  | 1.89   | <i>Prunus mume</i>                 |
| CL7707.Contig2_All | 0.72  | 5.88  | 3.03   | <i>Theobroma cacao</i>             |
| Unigene8694_All    | 0.88  | 43.15 | 5.62   | <i>Vitis vinifera</i>              |
| Unigene27729_All   | 16.75 | 68.49 | 2.03   | <i>Theobroma cacao</i>             |
| CL3156.Contig1_All | 38.25 | 11.8  | -1.70  | <i>Malus domestica</i>             |
| CL4581.Contig2_All | 3.53  | 0.86  | -2.04  | <i>Nelumbo nucifera</i>            |
| CL6102.Contig2_All | 31.2  | 13.41 | -1.22  | <i>Vitis vinifera</i>              |
| CL7559.Contig2_All | 14.64 | 2.85  | -2.36  | <i>Theobroma cacao</i>             |
| CL8001.Contig1_All | 5.06  | 0.68  | -2.90  | <i>Vitis vinifera</i>              |
| CL9026.Contig1_All | 9.67  | 2.52  | -1.94  | <i>Theobroma cacao</i>             |
| CL9130.Contig1_All | 3.07  | 0.01  | -8.26  | <i>Citrus sinensis</i>             |
| CL9504.Contig1_All | 9.92  | 2.67  | -1.89  | <i>Vitis vinifera</i>              |
| Unigene10520_All   | 8.24  | 0.01  | -9.69  | <i>Lotus japonicus</i>             |
| Unigene11068_All   | 21.09 | 4.76  | -2.15  | <i>Theobroma cacao</i>             |
| Unigene11162_All   | 5.63  | 0.2   | -4.82  | <i>Solanum lycopersicum</i>        |
| Unigene12084_All   | 45.43 | 2.97  | -3.94  | <i>Malus domestica</i>             |
| Unigene16064_All   | 28.74 | 0.14  | -7.68  | <i>Prunus mume</i>                 |
| Unigene16138_All   | 17.04 | 0.24  | -6.15  | <i>Nelumbo nucifera</i>            |
| Unigene1766_All    | 13.03 | 0.01  | -10.35 | <i>Nicotiana sylvestris</i>        |
| Unigene17676_All   | 9.84  | 0.55  | -4.16  | <i>Fragaria vesca subsp. vesca</i> |
| Unigene17695_All   | 84.78 | 1.75  | -5.60  | <i>Vitis vinifera</i>              |
| Unigene17775_All   | 23.22 | 2.08  | -3.48  | <i>Malus domestica</i>             |

|                    |       |       |        |                                    |
|--------------------|-------|-------|--------|------------------------------------|
| Unigene20260_All   | 12.87 | 3.91  | -1.72  | <i>Theobroma cacao</i>             |
| Unigene27074_All   | 8.85  | 4.29  | -1.04  | <i>Fragaria vesca subsp. vesca</i> |
| Unigene27097_All   | 8.51  | 1.64  | -2.38  | <i>Theobroma cacao</i>             |
| Unigene3_All       | 5.55  | 2.24  | -1.31  | <i>Cicer arietinum</i>             |
| Unigene3415_All    | 21.97 | 8.56  | -1.36  | <i>Vitis vinifera</i>              |
| Unigene4053_All    | 3.63  | 0.01  | -8.50  | <i>Populus simonii</i>             |
| Unigene4149_All    | 4.06  | 1.51  | -1.43  | <i>Vitis vinifera</i>              |
| Unigene5931_All    | 10.25 | 0.01  | -10.00 | <i>Vitis vinifera</i>              |
| Unigene7013_All    | 3.32  | 0.01  | -8.38  | <i>Vitis vinifera</i>              |
| Unigene7417_All    | 3.59  | 0.51  | -2.82  | <i>Vitis vinifera</i>              |
| Unigene9684_All    | 64.25 | 20.49 | -1.65  | <i>Vitis vinifera</i>              |
| <b>MADS-box</b>    |       |       |        |                                    |
| CL1478.Contig3_All | 0.01  | 0.65  | 6.02   | <i>Nelumbo nucifera</i>            |
| Unigene24561_All   | 13.17 | 0.01  | -10.36 | <i>Vitis vinifera</i>              |
| CL6533.Contig2_All | 9.39  | 0.01  | -9.87  | <i>Prunus mume</i>                 |
| Unigene9423_All    | 9.06  | 0.01  | -9.82  | <i>Nicotiana tomentosiformis</i>   |
| CL5411.Contig2_All | 0.42  | 0.01  | -5.39  | <i>Nelumbo nucifera</i>            |
| CL2234.Contig5_All | 3.75  | 0.01  | -8.55  | <i>Triticum aestivum</i>           |
| Unigene10524_All   | 5     | 2.31  | -1.11  | <i>Populus tremuloides</i>         |
| Unigene23053_All   | 1.32  | 0.01  | -7.04  | <i>Theobroma cacao</i>             |
| Unigene31802_All   | 0.22  | 0.01  | -4.46  | <i>Nicotiana tomentosiformis</i>   |
| <b>ZF</b>          |       |       |        |                                    |
| Unigene8363_All    | 3.26  | 0.01  | -8.35  | <i>Theobroma cacao</i>             |
| CL1528.Contig2_All | 6.75  | 0.63  | -3.42  | <i>Malus domestica</i>             |
| CL7870.Contig2_All | 5.74  | 0.85  | -2.76  | <i>Eucalyptus grandis</i>          |
| CL3079.Contig2_All | 4.2   | 1.05  | -2.00  | <i>Cucumis melo</i>                |
| CL6093.Contig1_All | 7.04  | 2.15  | -1.71  | <i>Theobroma cacao</i>             |
| CL104.Contig19_All | 15.99 | 4.16  | -1.94  | <i>Pyrus x bretschneideri</i>      |
| CL1059.Contig5_All | 7.83  | 3.82  | -1.04  | <i>Morus notabilis</i>             |
| CL1153.Contig1_All | 6.48  | 2.71  | -1.26  | <i>Vitis vinifera</i>              |
| CL1249.Contig2_All | 7.45  | 2.24  | -1.73  | <i>Prunus mume</i>                 |
| CL1456.Contig3_All | 12.81 | 4.94  | -1.37  | <i>Phoenix dactylifera</i>         |
| CL1525.Contig2_All | 3.17  | 0.97  | -1.71  | <i>Linum usitatissimum</i>         |
| CL213.Contig2_All  | 5.91  | 2.1   | -1.49  | <i>Brassica rapa</i>               |
| CL2230.Contig2_All | 7.89  | 2.91  | -1.44  | <i>Vitis vinifera</i>              |
| CL2251.Contig1_All | 3.65  | 0.52  | -2.81  | <i>Prunus mume</i>                 |
| CL2680.Contig1_All | 8.59  | 2.92  | -1.56  | <i>Pyrus x bretschneideri</i>      |
| CL2784.Contig1_All | 14.65 | 6.94  | -1.08  | <i>Solanum lycopersicum</i>        |
| CL2904.Contig5_All | 9.94  | 1.49  | -2.74  | <i>Citrus sinensis</i>             |
| CL3061.Contig1_All | 73.81 | 0.01  | -12.85 | <i>Theobroma cacao</i>             |
| CL3473.Contig1_All | 2.01  | 0.01  | -7.65  | <i>Nicotiana sylvestris</i>        |
| CL3528.Contig2_All | 4.47  | 1.87  | -1.26  | <i>Nicotiana sylvestris</i>        |
| CL5822.Contig2_All | 3.15  | 0.92  | -1.78  | <i>Arabidopsis thaliana</i>        |
| CL5844.Contig3_All | 4.27  | 0.01  | -8.74  | <i>Theobroma cacao</i>             |

|                    |        |       |        |                                      |
|--------------------|--------|-------|--------|--------------------------------------|
| CL6565.Contig2_All | 3.21   | 0.01  | -8.33  | <i>Vitis vinifera</i>                |
| CL6912.Contig1_All | 15.87  | 0.37  | -5.42  | <i>Citrus sinensis</i>               |
| CL3811.Contig4_All | 33.86  | 5.05  | -2.75  | <i>Nicotiana sylvestris</i>          |
| CL6239.Contig1_All | 40.09  | 6.27  | -2.68  | <i>Glycine max</i>                   |
| CL6005.Contig1_All | 3.91   | 0.77  | -2.34  | <i>Theobroma cacao</i>               |
| CL647.Contig3_All  | 18.41  | 4.25  | -2.11  | <i>Nelumbo nucifera</i>              |
| CL7175.Contig2_All | 47.35  | 11.12 | -2.09  | <i>Nelumbo nucifera</i>              |
| CL4249.Contig1_All | 74.07  | 18.3  | -2.02  | <i>Populus trichocarpa</i>           |
| CL6108.Contig1_All | 13.67  | 3.66  | -1.90  | <i>Glycine max</i>                   |
| CL5085.Contig3_All | 1.23   | 0.33  | -1.90  | <i>Theobroma cacao</i>               |
| CL7205.Contig2_All | 14.33  | 3.97  | -1.85  | <i>Beta vulgaris subsp. vulgaris</i> |
| CL4024.Contig2_All | 16.74  | 5.36  | -1.64  | <i>Malus domestica</i>               |
| CL4800.Contig1_All | 9.92   | 3.96  | -1.32  | <i>Theobroma cacao</i>               |
| CL4998.Contig3_All | 9.85   | 3.98  | -1.31  | <i>Nicotiana tomentosiformis</i>     |
| CL6754.Contig1_All | 4.83   | 2.35  | -1.04  | <i>Theobroma cacao</i>               |
| CL7346.Contig1_All | 22.19  | 4.76  | -2.22  | <i>Pyrus x bretschneideri</i>        |
| CL7398.Contig1_All | 67.54  | 23.5  | -1.52  | <i>Theobroma cacao</i>               |
| CL7548.Contig1_All | 7.05   | 2.13  | -1.73  | <i>Nelumbo nucifera</i>              |
| CL7981.Contig1_All | 7.18   | 2.88  | -1.32  | <i>Medicago truncatula</i>           |
| CL8054.Contig1_All | 31.05  | 6.75  | -2.20  | <i>Nicotiana tomentosiformis</i>     |
| CL8254.Contig1_All | 12.04  | 4.5   | -1.42  | <i>Theobroma cacao</i>               |
| CL8476.Contig1_All | 8.01   | 1.86  | -2.11  | <i>Nicotiana tomentosiformis</i>     |
| CL8626.Contig3_All | 14.28  | 6.95  | -1.04  | <i>Nelumbo nucifera</i>              |
| Unigene10303_All   | 4.22   | 1.04  | -2.02  | <i>Theobroma cacao</i>               |
| Unigene10320_All   | 6.54   | 2.72  | -1.27  | <i>Theobroma cacao</i>               |
| Unigene10801_All   | 6.55   | 0.28  | -4.55  | <i>Solanum tuberosum</i>             |
| Unigene11037_All   | 14.1   | 4.93  | -1.52  | <i>Silene latifolia</i>              |
| Unigene11889_All   | 3.58   | 0.01  | -8.48  | <i>Ricinus communis</i>              |
| Unigene12056_All   | 26.98  | 10.88 | -1.31  | <i>Theobroma cacao</i>               |
| Unigene12085_All   | 24.99  | 5.16  | -2.28  | <i>Ricinus communis</i>              |
| Unigene1234_All    | 31.04  | 1.03  | -4.91  | <i>Populus trichocarpa</i>           |
| Unigene12834_All   | 29.07  | 4.36  | -2.74  | <i>Vitis vinifera</i>                |
| Unigene13066_All   | 48.32  | 23.67 | -1.03  | <i>Populus trichocarpa</i>           |
| Unigene1344_All    | 1.78   | 0.01  | -7.48  | <i>Brassica rapa</i>                 |
| Unigene13958_All   | 8.34   | 3.51  | -1.25  | <i>Nelumbo nucifera</i>              |
| Unigene1451_All    | 26.12  | 6.26  | -2.06  | <i>Vitis vinifera</i>                |
| Unigene1480_All    | 106.72 | 4.4   | -4.60  | <i>Eucalyptus grandis</i>            |
| Unigene18007_All   | 40.36  | 0.01  | -11.98 | <i>Nicotiana sylvestris</i>          |
| Unigene30323_All   | 5.23   | 0.01  | -9.03  | <i>Nicotiana tomentosiformis</i>     |
| Unigene18411_All   | 3.77   | 0.01  | -8.56  | <i>Malus domestica</i>               |
| Unigene6975_All    | 31.33  | 0.44  | -6.15  | <i>Morus notabilis</i>               |
| Unigene15982_All   | 37.27  | 1.32  | -4.82  | <i>Populus trichocarpa</i>           |
| Unigene35464_All   | 6.56   | 0.53  | -3.63  | <i>Solanum lycopersicum</i>          |
| Unigene461_All     | 4.2    | 0.37  | -3.50  | <i>Nelumbo nucifera</i>              |

|                    |       |       |       |                               |
|--------------------|-------|-------|-------|-------------------------------|
| Unigene251_All     | 2.55  | 0.26  | -3.29 | <i>Medicago truncatula</i>    |
| Unigene31278_All   | 16.75 | 1.94  | -3.11 | <i>Glycine max</i>            |
| Unigene16195_All   | 9.17  | 1.91  | -2.26 | <i>Pyrus x bretschneideri</i> |
| Unigene3903_All    | 4.1   | 0.94  | -2.12 | <i>Nelumbo nucifera</i>       |
| Unigene8602_All    | 9.06  | 2.59  | -1.81 | <i>Nelumbo nucifera</i>       |
| Unigene27507_All   | 4.1   | 1.33  | -1.62 | <i>Nicotiana sylvestris</i>   |
| Unigene268_All     | 45.55 | 16.62 | -1.45 | <i>Nicotiana sylvestris</i>   |
| Unigene17840_All   | 27.73 | 10.71 | -1.37 | <i>Morus notabilis</i>        |
| Unigene6014_All    | 9.93  | 3.96  | -1.33 | <i>Medicago truncatula</i>    |
| Unigene18146_All   | 9.85  | 3.99  | -1.30 | <i>Vitis vinifera</i>         |
| Unigene5212_All    | 10.69 | 4.42  | -1.27 | <i>Vitis vinifera</i>         |
| Unigene2389_All    | 15.41 | 6.38  | -1.27 | <i>Vitis vinifera</i>         |
| Unigene8686_All    | 20.36 | 8.87  | -1.20 | <i>Theobroma cacao</i>        |
| Unigene4926_All    | 13.7  | 6.18  | -1.15 | <i>Prunus mume</i>            |
| Unigene5790_All    | 7.3   | 3.42  | -1.09 | <i>Theobroma cacao</i>        |
| Unigene16891_All   | 20.26 | 9.98  | -1.02 | <i>Prunus mume</i>            |
| Unigene6232_All    | 17.56 | 8.74  | -1.01 | <i>Ricinus communis</i>       |
| CL2153.Contig3_All | 1.7   | 4.94  | 1.54  | <i>Theobroma cacao</i>        |
| CL7243.Contig1_All | 9.54  | 21.92 | 1.20  | <i>Nelumbo nucifera</i>       |
| CL7243.Contig3_All | 2.47  | 8.1   | 1.71  | <i>Nelumbo nucifera</i>       |
| CL8626.Contig2_All | 1.61  | 9.77  | 2.60  | <i>Nelumbo nucifera</i>       |
| CL9583.Contig2_All | 0.1   | 12.72 | 6.99  | <i>Saruma henryi</i>          |
| CL5689.Contig2_All | 2.51  | 16.84 | 2.75  | <i>Theobroma cacao</i>        |
| Unigene7177_All    | 4.6   | 18.11 | 1.98  | <i>Vitis vinifera</i>         |
| Unigene12010_All   | 10.82 | 34.4  | 1.67  | <i>Prunus mume</i>            |
| Unigene7539_All    | 1.39  | 3.99  | 1.52  | <i>Theobroma cacao</i>        |
| CL5483.Contig2_All | 39.11 | 82.06 | 1.07  | <i>Theobroma cacao</i>        |
| Unigene16749_All   | 12.9  | 27.06 | 1.07  | <i>Theobroma cacao</i>        |
| Unigene8812_All    | 24.39 | 53.84 | 1.14  | <i>Nicotiana sylvestris</i>   |
| Unigene18264_All   | 8.47  | 21.69 | 1.36  | <i>Populus trichocarpa</i>    |
| Unigene5811_All    | 3.33  | 8.82  | 1.41  | <i>Prunus mume</i>            |
| CL8887.Contig1_All | 1.37  | 5.38  | 1.97  | <i>Medicago truncatula</i>    |
| Unigene12475_All   | 0.7   | 6.77  | 3.27  | <i>Medicago truncatula</i>    |
| CL5054.Contig1_All | 4.2   | 13.07 | 1.64  | <i>Cicer arietinum</i>        |
| CL6271.Contig1_All | 1.16  | 4.83  | 2.06  | <i>Populus trichocarpa</i>    |
| CL5550.Contig2_All | 5.71  | 31.99 | 2.49  | <i>Glycine max</i>            |
| CL4536.Contig3_All | 1.88  | 10.94 | 2.54  | <i>Solanum lycopersicum</i>   |
| CL4442.Contig2_All | 4.18  | 29.03 | 2.80  | <i>Vitis vinifera</i>         |
| Unigene5674_All    | 0.01  | 1.85  | 7.53  | <i>Prunus mume</i>            |
| CL2069.Contig1_All | 0.01  | 18.51 | 10.85 | <i>Nelumbo nucifera</i>       |
| CL4799.Contig2_All | 0.01  | 1.61  | 7.33  | <i>Pyrus x bretschneideri</i> |
| CL37.Contig3_All   | 0.01  | 1.92  | 7.58  | <i>Populus trichocarpa</i>    |
| CL6690.Contig2_All | 0.01  | 79.44 | 12.96 | <i>Vitis vinifera</i>         |

**HSF**

|                    |       |        |        |                                    |
|--------------------|-------|--------|--------|------------------------------------|
| CL1745.Contig1_All | 12.4  | 5.14   | -1.27  | <i>Populus trichocarpa</i>         |
| CL1745.Contig2_All | 32.55 | 11.15  | -1.55  | <i>Populus trichocarpa</i>         |
| CL1986.Contig1_All | 2.95  | 0.23   | -3.68  | <i>Capparis spinosa</i>            |
| CL1986.Contig3_All | 27.74 | 7.03   | -1.98  | <i>Solanum tuberosum</i>           |
| CL1986.Contig4_All | 25.54 | 8.37   | -1.61  | <i>Vitis vinifera</i>              |
| CL2066.Contig3_All | 17.16 | 5.87   | -1.55  | <i>Citrus sinensis</i>             |
| CL2066.Contig4_All | 4.43  | 1.04   | -2.09  | <i>Musa acuminata</i>              |
| CL2779.Contig1_All | 6.99  | 1.52   | -2.20  | <i>Vitis vinifera</i>              |
| CL2779.Contig2_All | 5.24  | 1.77   | -1.57  | <i>Vitis vinifera</i>              |
| CL3372.Contig1_All | 26    | 0.91   | -4.84  | <i>Cucumis melo</i>                |
| CL3372.Contig2_All | 28.41 | 0.01   | -11.47 | <i>Cucumis melo</i>                |
| CL5603.Contig1_All | 3.37  | 0.82   | -2.04  | <i>Ricinus communis</i>            |
| CL6191.Contig2_All | 11.25 | 1.13   | -3.32  | <i>Chenopodium album</i>           |
| CL6296.Contig1_All | 44.76 | 6.85   | -2.71  | <i>Oxybasis rubra</i>              |
| CL6546.Contig1_All | 2.77  | 0.01   | -8.11  | <i>Theobroma cacao</i>             |
| CL6546.Contig5_All | 2.29  | 0.37   | -2.63  | <i>Theobroma cacao</i>             |
| CL7113.Contig1_All | 7.89  | 1.15   | -2.78  | <i>Cucumis melo</i>                |
| CL7682.Contig1_All | 13.18 | 0.17   | -6.28  | <i>Vitis vinifera</i>              |
| CL7682.Contig2_All | 8.5   | 0.01   | -9.73  | <i>Vitis vinifera</i>              |
| CL8208.Contig5_All | 5.84  | 1.57   | -1.90  | <i>Vitis vinifera</i>              |
| Unigene29093_All   | 5.54  | 0.01   | -9.11  | <i>Micromonas pusilla</i> CCMP1545 |
| Unigene18326_All   | 24.33 | 0.36   | -6.08  | <i>Nicotiana tomentosiformis</i>   |
| Unigene5261_All    | 42.95 | 2.91   | -3.88  | <i>Pyrus x bretschneideri</i>      |
| Unigene10400_All   | 22.69 | 4.35   | -2.38  | <i>Medicago truncatula</i>         |
| Unigene12840_All   | 6.33  | 1.5    | -2.08  | <i>Nicotiana tomentosiformis</i>   |
| Unigene4752_All    | 10.69 | 2.67   | -2.00  | <i>Nelumbo nucifera</i>            |
| Unigene3969_All    | 8.76  | 2.27   | -1.95  | <i>Beta vulgaris</i>               |
| Unigene1293_All    | 16.75 | 5.02   | -1.74  | <i>Rosa hybrid cultivar</i>        |
| Unigene8975_All    | 47.71 | 15.78  | -1.60  | <i>Pyrus x bretschneideri</i>      |
| Unigene18261_All   | 11.7  | 4.37   | -1.42  | <i>Glycine max</i>                 |
| Unigene508_All     | 7.74  | 3      | -1.37  | <i>Glycine max</i>                 |
| Unigene25729_All   | 9.26  | 3.86   | -1.26  | <i>Theobroma cacao</i>             |
| Unigene7332_All    | 3.96  | 1.81   | -1.13  | <i>Ricinus communis</i>            |
| Unigene17363_All   | 11.08 | 5.25   | -1.08  | <i>Setaria italica</i>             |
| Unigene4936_All    | 14.53 | 7.05   | -1.04  | <i>Theobroma cacao</i>             |
| Unigene5364_All    | 50.04 | 105.32 | 1.07   | <i>Solanum lycopersicum</i>        |
| Unigene11441_All   | 16.44 | 60.35  | 1.88   | <i>Nelumbo nucifera</i>            |
| Unigene16844_All   | 58.19 | 231.61 | 1.99   | <i>Spinacia oleracea</i>           |
| CL5758.Contig3_All | 0.88  | 2.93   | 1.74   | <i>Nicotiana tomentosiformis</i>   |
| CL7449.Contig2_All | 11.7  | 49.47  | 2.08   | <i>Chenopodium album</i>           |
| CL3871.Contig2_All | 0.01  | 1.69   | 7.40   | <i>Theobroma cacao</i>             |

**Table S15.** Differentially expressed genes (DEGs) related to protein kinase in leaves of *A. canescens* after 100 mM NaCl treatment for 6 h. FPKM-CL6 and FPKM-SL6 respectively indicates the FPKM value of a gene in leaves under control condition for 6 h and salt treatment



for 6 h. Fold change equals to  $\log_2$  (FPKM-SL6 / FPKM-CL6). Protein refer to the protein encoded by each DEGs.

| Gene ID            | FPKM -CL6 | FPKM -SL6 | Fold change | Homologous species               |
|--------------------|-----------|-----------|-------------|----------------------------------|
| <b>RLK</b>         |           |           |             |                                  |
| Unigene35208_All   | 1.18      | 0.01      | -6.88       | <i>Vitis vinifera</i>            |
| Unigene36621_All   | 0.62      | 0.01      | -5.95       | <i>Eucalyptus grandis</i>        |
| CL4075.Contig1_All | 2.71      | 0.54      | -2.32       | <i>Solanum tuberosum</i>         |
| Unigene2959_All    | 5.49      | 1.29      | -2.09       | <i>Solanum tuberosum</i>         |
| CL4830.Contig1_All | 1.82      | 0.45      | -2.02       | <i>Vitis vinifera</i>            |
| Unigene7148_All    | 6.28      | 1.86      | -1.76       | <i>Nelumbo nucifera</i>          |
| Unigene15443_All   | 1.02      | 0.51      | -1.00       | <i>Morus notabilis</i>           |
| Unigene13701_All   | 37.7      | 0.4       | -6.56       | <i>Brassica rapa</i>             |
| Unigene39455_All   | 0.67      | 0.01      | -6.07       | <i>Arabidopsis thaliana</i>      |
| CL6747.Contig2_All | 0.59      | 0.01      | -5.88       | <i>Phoenix dactylifera</i>       |
| Unigene24849_All   | 0.41      | 0.01      | -5.36       | <i>Phoenix dactylifera</i>       |
| CL1768.Contig7_All | 6.67      | 0.29      | -4.52       | <i>Prunus mume</i>               |
| Unigene29556_All   | 0.77      | 0.26      | -1.57       | <i>Malus domestica</i>           |
| Unigene11654_All   | 13.82     | 42.36     | 1.62        | <i>Nicotiana sylvestris</i>      |
| Unigene7507_All    | 1.43      | 5.62      | 1.97        | <i>Morus notabilis</i>           |
| CL1604.Contig3_All | 3.32      | 13.81     | 2.06        | <i>Vitis vinifera</i>            |
| CL3685.Contig2_All | 0.03      | 5.42      | 7.50        | <i>Ricinus communis</i>          |
| Unigene12732_All   | 0.27      | 8.7       | 5.01        | <i>Ricinus communis</i>          |
| Unigene16763_All   | 5.96      | 12.16     | 1.03        | <i>Prunus mume</i>               |
| Unigene34017_All   | 0.65      | 2.21      | 1.77        | <i>Nelumbo nucifera</i>          |
| Unigene30033_All   | 1.48      | 6.67      | 2.17        | <i>Musa acuminata</i>            |
| Unigene9831_All    | 0.8       | 7.42      | 3.21        | <i>Nicotiana tomentosiformis</i> |
| Unigene13978_All   | 0.32      | 70.05     | 7.77        | <i>Pyrus x bretschneideri</i>    |
| Unigene15867_All   | 0.62      | 6.09      | 3.30        | <i>Vitis vinifera</i>            |
| CL3305.Contig3_All | 0.48      | 3.28      | 2.77        | <i>Vitis vinifera</i>            |
| CL2170.Contig4_All | 0.79      | 4.81      | 2.60        | <i>Prunus mume</i>               |
| CL2170.Contig5_All | 1.35      | 6.43      | 2.25        | <i>Nelumbo nucifera</i>          |
| Unigene14470_All   | 1.41      | 6.28      | 2.15        | <i>Vitis vinifera</i>            |
| CL7493.Contig2_All | 2.23      | 20.57     | 3.21        | <i>Nelumbo nucifera</i>          |
| Unigene17553_All   | 2.2       | 6.66      | 1.59        | <i>Prunus mume</i>               |
| Unigene16822_All   | 7.13      | 20.88     | 1.55        | <i>Nelumbo nucifera</i>          |
| Unigene8447_All    | 15.13     | 31.07     | 1.04        | <i>Vitis vinifera</i>            |
| CL264.Contig2_All  | 13.04     | 55.21     | 2.08        | <i>Vitis vinifera</i>            |
| CL2170.Contig3_All | 0.01      | 0.21      | 4.39        | <i>Morus notabilis</i>           |
| CL2893.Contig5_All | 0.01      | 0.64      | 6.00        | <i>Nelumbo nucifera</i>          |
| Unigene38755_All   | 0.01      | 0.68      | 6.08        | <i>Nelumbo nucifera</i>          |
| CL7451.Contig5_All | 0.01      | 0.7       | 6.13        | <i>Phoenix dactylifera</i>       |
| Unigene33490_All   | 0.01      | 1.04      | 6.70        | <i>Pyrus x bretschneideri</i>    |
| CL6175.Contig1_All | 0.01      | 1.33      | 7.06        | <i>Vitis vinifera</i>            |

|                    |       |       |       |                                  |
|--------------------|-------|-------|-------|----------------------------------|
| Unigene34019_All   | 0.01  | 2.22  | 7.79  | <i>Vitis vinifera</i>            |
| Unigene36094_All   | 0.01  | 3.2   | 8.32  | <i>Nelumbo nucifera</i>          |
| Unigene21989_All   | 0.01  | 15.35 | 10.58 | <i>Nelumbo nucifera</i>          |
| Unigene1080_All    | 0.01  | 0.28  | 4.80  | <i>Solanum lycopersicum</i>      |
| Unigene30353_All   | 0.01  | 1.38  | 7.10  | <i>Ricinus communis</i>          |
| <b>WAK</b>         |       |       |       |                                  |
| CL7712.Contig2_All | 4.43  | 0.01  | -8.79 | <i>Cucumis sativus</i>           |
| Unigene2643_All    | 4.07  | 0.01  | -8.67 | <i>Theobroma cacao</i>           |
| Unigene4677_All    | 2.52  | 0.01  | -7.98 | <i>Ricinus communis</i>          |
| Unigene22036_All   | 1.67  | 0.01  | -7.38 | <i>Ricinus communis</i>          |
| CL1625.Contig4_All | 0.66  | 0.01  | -6.04 | <i>Solanum lycopersicum</i>      |
| CL171.Contig1_All  | 0.65  | 0.01  | -6.02 | <i>Medicago truncatula</i>       |
| Unigene4114_All    | 6.9   | 0.17  | -5.34 | <i>Prunus mume</i>               |
| Unigene8224_All    | 3.11  | 0.18  | -4.11 | <i>Vitis vinifera</i>            |
| Unigene20305_All   | 2.71  | 0.34  | -2.99 | <i>Citrus sinensis</i>           |
| CL342.Contig2_All  | 2.85  | 0.54  | -2.40 | <i>Eucalyptus grandis</i>        |
| CL2993.Contig2_All | 5.02  | 1     | -2.33 | <i>Fragaria vesca</i>            |
| Unigene4137_All    | 3.27  | 1.35  | -1.28 | <i>Nelumbo nucifera</i>          |
| Unigene11429_All   | 13.07 | 32    | 1.29  | <i>Eucalyptus grandis</i>        |
| Unigene5799_All    | 1.51  | 4.06  | 1.43  | <i>Vitis vinifera</i>            |
| Unigene3955_All    | 2.93  | 8.36  | 1.51  | <i>Nicotiana tomentosiformis</i> |
| Unigene15340_All   | 0.71  | 2.14  | 1.59  | <i>Nicotiana sylvestris</i>      |
| CL1625.Contig3_All | 0.35  | 1.06  | 1.60  | <i>Zea mays</i>                  |
| CL6066.Contig1_All | 3.58  | 10.87 | 1.60  | <i>Ricinus communis</i>          |
| CL219.Contig9_All  | 1.26  | 4.62  | 1.87  | <i>Eucalyptus grandis</i>        |
| Unigene732_All     | 1.44  | 5.53  | 1.94  | <i>Nicotiana tabacum</i>         |
| Unigene29407_All   | 0.41  | 1.63  | 1.99  | <i>Vitis vinifera</i>            |
| CL219.Contig3_All  | 2.56  | 10.32 | 2.01  | <i>Citrus sinensis</i>           |
| CL1625.Contig1_All | 1.02  | 4.44  | 2.12  | <i>Nelumbo nucifera</i>          |
| CL219.Contig7_All  | 1.78  | 8.71  | 2.29  | <i>Nelumbo nucifera</i>          |
| CL219.Contig10_All | 1.61  | 8.83  | 2.45  | <i>Citrus sinensis</i>           |
| Unigene4688_All    | 0.64  | 3.85  | 2.59  | <i>Citrus sinensis</i>           |
| CL219.Contig12_All | 1.79  | 13.41 | 2.90  | <i>Eucalyptus grandis</i>        |
| Unigene36213_All   | 0.26  | 2.34  | 3.17  | <i>Cucumis melo</i>              |
| Unigene16011_All   | 2.53  | 35.89 | 3.83  | <i>Nelumbo nucifera</i>          |
| Unigene850_All     | 0.26  | 6.18  | 4.57  | <i>Ricinus communis</i>          |
| CL7712.Contig1_All | 0.42  | 24.1  | 5.84  | <i>Nelumbo nucifera</i>          |
| CL7712.Contig3_All | 0.29  | 20.35 | 6.13  | <i>Nelumbo nucifera</i>          |
| Unigene36859_All   | 0.01  | 0.72  | 6.16  | <i>Solanum lycopersicum</i>      |
| Unigene29472_All   | 0.01  | 1.24  | 6.95  | <i>Nicotiana sylvestris</i>      |
| Unigene34082_All   | 0.01  | 1.78  | 7.48  | <i>Morus notabilis</i>           |
| CL8521.Contig2_All | 0.01  | 2.47  | 7.95  | <i>Eucalyptus grandis</i>        |
| Unigene35516_All   | 0.01  | 3.54  | 8.47  | <i>Nelumbo nucifera</i>          |

**LecRLK**

|                    |       |       |       |                               |
|--------------------|-------|-------|-------|-------------------------------|
| Unigene9770_All    | 5.95  | 0.01  | -9.22 | <i>Prunus mume</i>            |
| CL9096.Contig1_All | 2.64  | 0.01  | -8.04 | <i>Pyrus x bretschneideri</i> |
| CL6802.Contig1_All | 1.94  | 0.01  | -7.60 | <i>Eucalyptus grandis</i>     |
| CL30.Contig9_All   | 1.46  | 0.01  | -7.19 | <i>Eucalyptus grandis</i>     |
| CL126.Contig1_All  | 0.53  | 0.01  | -5.73 | <i>Brassica rapa</i>          |
| Unigene16277_All   | 17.32 | 0.36  | -5.58 | <i>Cicer arietinum</i>        |
| CL7244.Contig2_All | 0.36  | 0.01  | -5.17 | <i>Nelumbo nucifera</i>       |
| Unigene40469_All   | 0.36  | 0.01  | -5.17 | <i>Populus trichocarpa</i>    |
| Unigene2748_All    | 1.28  | 0.14  | -3.19 | <i>Vitis vinifera</i>         |
| CL4407.Contig1_All | 5.86  | 1.18  | -2.31 | <i>Malus domestica</i>        |
| Unigene22602_All   | 4.7   | 1.34  | -1.81 | <i>Brassica rapa</i>          |
| CL1876.Contig5_All | 5.01  | 1.56  | -1.68 | <i>Vitis vinifera</i>         |
| CL2621.Contig4_All | 7.87  | 2.81  | -1.48 | <i>Pyrus x bretschneideri</i> |
| CL1044.Contig2_All | 4.66  | 1.83  | -1.35 | <i>Vitis vinifera</i>         |
| CL3313.Contig6_All | 0.39  | 0.78  | 1.00  | <i>Malus domestica</i>        |
| Unigene12686_All   | 1.62  | 3.29  | 1.02  | <i>Vitis vinifera</i>         |
| CL6941.Contig1_All | 18.83 | 38.83 | 1.04  | <i>Theobroma cacao</i>        |
| CL2927.Contig5_All | 0.11  | 0.24  | 1.13  | <i>Glycine max</i>            |
| Unigene7995_All    | 0.41  | 1     | 1.29  | <i>Nelumbo nucifera</i>       |
| CL2927.Contig2_All | 2.33  | 6.66  | 1.51  | <i>Cucumis sativus</i>        |
| CL5713.Contig2_All | 2.02  | 5.78  | 1.52  | <i>Malus domestica</i>        |
| CL2011.Contig2_All | 1.84  | 5.37  | 1.54  | <i>Nicotiana glauca</i>       |
| CL3763.Contig3_All | 1.15  | 3.37  | 1.55  | <i>Nelumbo nucifera</i>       |
| Unigene35065_All   | 0.43  | 1.3   | 1.60  | <i>Glycine max</i>            |
| CL136.Contig1_All  | 3.5   | 12.18 | 1.79  | <i>Nicotiana glauca</i>       |
| Unigene12173_All   | 2.57  | 9.11  | 1.82  | <i>Nelumbo nucifera</i>       |
| Unigene35732_All   | 0.56  | 2.25  | 2.00  | <i>Fragaria vesca</i>         |
| CL2927.Contig8_All | 0.5   | 2.01  | 2.00  | <i>Glycine max</i>            |
| Unigene14931_All   | 1.3   | 5.64  | 2.11  | <i>Prunus mume</i>            |
| Unigene114_All     | 0.4   | 1.86  | 2.22  | <i>Vitis vinifera</i>         |
| CL2927.Contig1_All | 2.03  | 9.59  | 2.24  | <i>Cucumis sativus</i>        |
| CL8882.Contig1_All | 1.62  | 9.14  | 2.50  | <i>Citrus sinensis</i>        |
| CL2011.Contig1_All | 2.67  | 15.23 | 2.51  | <i>Citrus sinensis</i>        |
| CL1044.Contig1_All | 0.58  | 3.5   | 2.59  | <i>Cucumis melo</i>           |
| Unigene12763_All   | 1.2   | 7.56  | 2.66  | <i>Theobroma cacao</i>        |
| Unigene14705_All   | 0.43  | 2.81  | 2.71  | <i>Vitis vinifera</i>         |
| CL1876.Contig2_All | 2.89  | 21.27 | 2.88  | <i>Vitis vinifera</i>         |
| CL6552.Contig6_All | 0.97  | 7.39  | 2.93  | <i>Glycine max</i>            |
| Unigene16516_All   | 0.45  | 6     | 3.74  | <i>Brassica rapa</i>          |
| Unigene27493_All   | 0.36  | 5.19  | 3.85  | <i>Vitis vinifera</i>         |
| CL389.Contig2_All  | 0.76  | 21.55 | 4.83  | <i>Vitis vinifera</i>         |
| CL1876.Contig4_All | 1.15  | 42.64 | 5.21  | <i>Vitis vinifera</i>         |
| CL1876.Contig1_All | 0.58  | 24.64 | 5.41  | <i>Vitis vinifera</i>         |

|                    |       |       |       |                                  |
|--------------------|-------|-------|-------|----------------------------------|
| Unigene3944_All    | 0.09  | 4.42  | 5.62  | <i>Vitis vinifera</i>            |
| Unigene14677_All   | 0.22  | 15.83 | 6.17  | <i>Theobroma cacao</i>           |
| Unigene21219_All   | 0.01  | 0.58  | 5.86  | <i>Nelumbo nucifera</i>          |
| Unigene26968_All   | 0.01  | 1.03  | 6.69  | <i>Nicotiana tomentosiformis</i> |
| Unigene37389_All   | 0.01  | 1.43  | 7.16  | <i>Nicotiana sylvestris</i>      |
| Unigene34574_All   | 0.01  | 2.69  | 8.07  | <i>Citrus sinensis</i>           |
| CL3763.Contig1_All | 0.01  | 3.18  | 8.31  | <i>Nelumbo nucifera</i>          |
| CL7452.Contig2_All | 0.01  | 7.74  | 9.60  | <i>Vitis vinifera</i>            |
| Unigene18214_All   | 0.01  | 44.59 | 12.12 | <i>Eucalyptus grandis</i>        |
| <b>LRR-RLK</b>     |       |       |       |                                  |
| CL1803.Contig2_All | 9.77  | 0.01  | -9.93 | <i>Nelumbo nucifera</i>          |
| CL5423.Contig2_All | 7.87  | 0.01  | -9.62 | <i>Nicotiana tomentosiformis</i> |
| CL1231.Contig3_All | 5.82  | 0.01  | -9.18 | <i>Theobroma cacao</i>           |
| CL1231.Contig1_All | 4.97  | 0.01  | -8.96 | <i>Theobroma cacao</i>           |
| Unigene13207_All   | 4.75  | 0.01  | -8.90 | <i>Vitis vinifera</i>            |
| CL6713.Contig1_All | 1.71  | 0.01  | -7.42 | <i>Solanum lycopersicum</i>      |
| CL8833.Contig2_All | 1.19  | 0.01  | -6.89 | <i>Eucalyptus grandis</i>        |
| Unigene26697_All   | 1.17  | 0.01  | -6.87 | <i>Vitis vinifera</i>            |
| CL7338.Contig1_All | 0.98  | 0.01  | -6.61 | <i>Silene latifolia</i>          |
| Unigene35162_All   | 0.84  | 0.01  | -6.39 | <i>Eucalyptus grandis</i>        |
| Unigene7808_All    | 17.17 | 0.33  | -5.70 | <i>Vitis vinifera</i>            |
| CL1803.Contig3_All | 14.91 | 0.39  | -5.25 | <i>Nelumbo nucifera</i>          |
| CL9137.Contig2_All | 7.09  | 0.24  | -4.88 | <i>Vitis vinifera</i>            |
| CL1803.Contig5_All | 35.93 | 1.92  | -4.22 | <i>Malus domestica</i>           |
| CL1803.Contig1_All | 29.3  | 1.63  | -4.17 | <i>Eucalyptus grandis</i>        |
| CL5423.Contig3_All | 14.27 | 1.11  | -3.68 | <i>Nicotiana tomentosiformis</i> |
| Unigene7620_All    | 3.31  | 0.29  | -3.51 | <i>Morus notabilis</i>           |
| CL1803.Contig4_All | 21.36 | 3.34  | -2.67 | <i>Eucalyptus grandis</i>        |
| CL1729.Contig3_All | 1.09  | 0.28  | -1.96 | <i>Musa acuminata</i>            |
| Unigene15613_All   | 11.89 | 3.29  | -1.85 | <i>Populus trichocarpa</i>       |
| CL8233.Contig1_All | 2.01  | 0.61  | -1.72 | <i>Vitis vinifera</i>            |
| CL974.Contig1_All  | 3.43  | 1.08  | -1.67 | <i>Citrus sinensis</i>           |
| CL5874.Contig2_All | 6.27  | 2.04  | -1.62 | <i>Theobroma cacao</i>           |
| Unigene3742_All    | 4.3   | 1.83  | -1.23 | <i>Vitis vinifera</i>            |
| Unigene13104_All   | 2.82  | 5.64  | 1.00  | <i>Theobroma cacao</i>           |
| Unigene30007_All   | 0.26  | 0.53  | 1.02  | <i>Pyrus x bretschneideri</i>    |
| CL7879.Contig2_All | 7.58  | 15.76 | 1.05  | <i>Prunus mume</i>               |
| CL1909.Contig2_All | 3.19  | 6.84  | 1.10  | <i>Nicotiana tomentosiformis</i> |
| CL4514.Contig2_All | 6.46  | 14.35 | 1.15  | <i>Solanum lycopersicum</i>      |
| CL7967.Contig2_All | 2.34  | 5.25  | 1.16  | <i>Nicotiana sylvestris</i>      |
| CL1729.Contig1_All | 0.24  | 0.54  | 1.16  | <i>Vitis vinifera</i>            |
| CL9025.Contig1_All | 0.98  | 2.24  | 1.19  | <i>Cicer arietinum</i>           |
| Unigene16745_All   | 12.83 | 29.7  | 1.21  | <i>Theobroma cacao</i>           |
| CL7365.Contig2_All | 1.72  | 4.45  | 1.37  | <i>Vitis vinifera</i>            |

|                    |       |        |      |                                  |
|--------------------|-------|--------|------|----------------------------------|
| CL652.Contig2_All  | 7.62  | 20.14  | 1.40 | <i>Nelumbo nucifera</i>          |
| CL1483.Contig1_All | 6.64  | 17.69  | 1.41 | <i>Nicotiana sylvestris</i>      |
| CL7879.Contig1_All | 5.78  | 15.49  | 1.42 | <i>Prunus mume</i>               |
| Unigene2462_All    | 36.35 | 105.75 | 1.54 | <i>Prunus mume</i>               |
| Unigene35817_All   | 0.57  | 1.73   | 1.60 | <i>Vitis vinifera</i>            |
| Unigene3321_All    | 4.11  | 12.76  | 1.63 | <i>Vitis vinifera</i>            |
| CL974.Contig2_All  | 1.46  | 4.61   | 1.66 | <i>Citrus sinensis</i>           |
| Unigene1518_All    | 6.14  | 20.11  | 1.71 | <i>Malus domestica</i>           |
| CL4956.Contig2_All | 1.17  | 4.5    | 1.94 | <i>Vitis vinifera</i>            |
| Unigene13054_All   | 0.91  | 3.54   | 1.96 | <i>Vitis vinifera</i>            |
| Unigene4286_All    | 2.63  | 12.44  | 2.24 | <i>Vitis vinifera</i>            |
| Unigene6674_All    | 3.25  | 17.01  | 2.39 | <i>Prunus mume</i>               |
| CL7881.Contig2_All | 1.72  | 9.18   | 2.42 | <i>Pyrus x bretschneideri</i>    |
| Unigene11412_All   | 0.69  | 4.12   | 2.58 | <i>Pyrus x bretschneideri</i>    |
| CL2084.Contig1_All | 8.83  | 59.7   | 2.76 | <i>Glycine max</i>               |
| Unigene39769_All   | 0.13  | 1.39   | 3.42 | <i>Vitis vinifera</i>            |
| Unigene10870_All   | 0.03  | 3.38   | 6.82 | <i>Morus notabilis</i>           |
| Unigene1911_All    | 0.03  | 7.35   | 7.94 | <i>Prunus mume</i>               |
| Unigene6058_All    | 3.91  | 8.16   | 1.06 | <i>Ricinus communis</i>          |
| Unigene12904_All   | 1.93  | 4.08   | 1.08 | <i>Vitis vinifera</i>            |
| Unigene6664_All    | 6.62  | 14.65  | 1.15 | <i>Citrus sinensis</i>           |
| Unigene29730_All   | 0.71  | 1.65   | 1.22 | <i>Cucumis sativus</i>           |
| Unigene11487_All   | 17.12 | 42.03  | 1.30 | <i>Vitis vinifera</i>            |
| Unigene4127_All    | 2.75  | 7.91   | 1.52 | <i>Theobroma cacao</i>           |
| Unigene32199_All   | 1.7   | 5.09   | 1.58 | <i>Setaria italica</i>           |
| Unigene5546_All    | 1.33  | 4.24   | 1.67 | <i>Nicotiana sylvestris</i>      |
| Unigene17179_All   | 4.77  | 17.21  | 1.85 | <i>Vitis vinifera</i>            |
| Unigene11535_All   | 4.18  | 16.1   | 1.95 | <i>Morus notabilis</i>           |
| CL2928.Contig4_All | 0.93  | 5.68   | 2.61 | <i>Nelumbo nucifera</i>          |
| Unigene11338_All   | 0.68  | 4.24   | 2.64 | <i>Pyrus x bretschneideri</i>    |
| Unigene10979_All   | 1.38  | 9.64   | 2.80 | <i>Arabidopsis thaliana</i>      |
| CL2084.Contig2_All | 9.2   | 70.4   | 2.94 | <i>Vitis vinifera</i>            |
| Unigene6612_All    | 2.71  | 22.62  | 3.06 | <i>Theobroma cacao</i>           |
| Unigene239_All     | 2.06  | 19.1   | 3.21 | <i>Nicotiana tomentosiformis</i> |
| Unigene163_All     | 0.25  | 2.53   | 3.34 | <i>Vitis vinifera</i>            |
| CL8471.Contig1_All | 0.19  | 2.02   | 3.41 | <i>Theobroma cacao</i>           |
| Unigene29740_All   | 0.2   | 3.11   | 3.96 | <i>Theobroma cacao</i>           |
| Unigene16398_All   | 1.46  | 28.94  | 4.31 | <i>Theobroma cacao</i>           |
| Unigene5661_All    | 0.35  | 7.32   | 4.39 | <i>Nelumbo nucifera</i>          |
| Unigene11029_All   | 0.08  | 1.71   | 4.42 | <i>Populus trichocarpa</i>       |
| CL2928.Contig5_All | 0.46  | 9.98   | 4.44 | <i>Nelumbo nucifera</i>          |
| Unigene12746_All   | 0.05  | 2.3    | 5.52 | <i>Pyrus x bretschneideri</i>    |
| Unigene162_All     | 0.11  | 13.71  | 6.96 | <i>Theobroma cacao</i>           |
| CL657.Contig3_All  | 10.37 | 43.45  | 2.07 | <i>Nicotiana tomentosiformis</i> |

|                    |       |       |        |                                      |
|--------------------|-------|-------|--------|--------------------------------------|
| Unigene38560_All   | 0.01  | 0.8   | 6.32   | <i>Cicer arietinum</i>               |
| Unigene31266_All   | 0.01  | 1.04  | 6.70   | <i>Ricinus communis</i>              |
| Unigene36355_All   | 0.01  | 1.38  | 7.11   | <i>Solanum tuberosum</i>             |
| Unigene38082_All   | 0.01  | 1.39  | 7.12   | <i>Zea mays</i>                      |
| Unigene2037_All    | 0.01  | 4.28  | 8.74   | <i>Theobroma cacao</i>               |
| Unigene12747_All   | 0.01  | 6.69  | 9.39   | <i>Nicotiana tomentosiformis</i>     |
| CL2166.Contig3_All | 0.01  | 21.72 | 11.08  | <i>Vitis vinifera</i>                |
| CL2166.Contig1_All | 0.01  | 31.9  | 11.64  | <i>Vitis vinifera</i>                |
| Unigene39549_All   | 0.01  | 0.95  | 6.57   | <i>Vitis vinifera</i>                |
| Unigene31458_All   | 0.01  | 1.32  | 7.04   | <i>Eucalyptus grandis</i>            |
| CL1768.Contig6_All | 0.01  | 1.53  | 7.26   | <i>Vitis vinifera</i>                |
| Unigene30665_All   | 0.01  | 2.62  | 8.03   | <i>Fragaria vesca</i>                |
| CL371.Contig3_All  | 0.01  | 2.85  | 8.15   | <i>Prunus mume</i>                   |
| Unigene37147_All   | 0.01  | 4.38  | 8.77   | <i>Nicotiana tomentosiformis</i>     |
| Unigene14583_All   | 0.01  | 5.73  | 9.16   | <i>Malus domestica</i>               |
| CL6713.Contig2_All | 0.01  | 8.58  | 9.74   | <i>Solanum lycopersicum</i>          |
| Unigene450_All     | 0.01  | 9.78  | 9.93   | <i>Nelumbo nucifera</i>              |
| CL2166.Contig2_All | 0.01  | 26.87 | 11.39  | <i>Solanum tuberosum</i>             |
| Unigene12036_All   | 0.01  | 65.55 | 12.68  | <i>Fragaria vesca</i>                |
| <b>LysM</b>        |       |       |        |                                      |
| Unigene40057_All   | 0.53  | 0.01  | -5.73  | <i>Pyrus x bretschneideri</i>        |
| CL6066.Contig2_All | 0.19  | 5.27  | 4.79   | <i>Nelumbo nucifera</i>              |
| CL4753.Contig2_All | 1.64  | 3.28  | 1.00   | <i>Nelumbo nucifera</i>              |
| Unigene28415_All   | 0.01  | 2.98  | 8.22   | <i>Cercis chinensis</i>              |
| <b>CDPK</b>        |       |       |        |                                      |
| CL280.Contig5_All  | 3.13  | 0.01  | -8.29  | <i>Theobroma cacao</i>               |
| Unigene22774_All   | 0.94  | 0.01  | -6.55  | <i>Ricinus communis</i>              |
| CL280.Contig7_All  | 5.48  | 0.33  | -4.05  | <i>Theobroma cacao</i>               |
| CL280.Contig6_All  | 4.31  | 0.78  | -2.47  | <i>Theobroma cacao</i>               |
| Unigene7837_All    | 20.4  | 75.41 | 1.89   | <i>Vitis vinifera</i>                |
| CL5216.Contig2_All | 2.96  | 13.5  | 2.19   | <i>Mesembryanthemum crystallinum</i> |
| CL4209.Contig1_All | 0.65  | 4.03  | 2.63   | <i>Theobroma cacao</i>               |
| Unigene9182_All    | 5.37  | 34.46 | 2.68   | <i>Theobroma cacao</i>               |
| CL8340.Contig1_All | 1.28  | 15.8  | 3.63   | <i>Theobroma cacao</i>               |
| CL8340.Contig1_All | 21.09 | 82.66 | 1.97   | <i>Beta vulgaris</i>                 |
| <b>MAPK</b>        |       |       |        |                                      |
| CL1892.Contig1_All | 32.64 | 0.01  | -11.67 | <i>Vitis vinifera</i>                |
| CL1892.Contig2_All | 13.05 | 0.01  | -10.35 | <i>Vitis vinifera</i>                |
| Unigene14008_All   | 4.63  | 0.22  | -4.40  | <i>Vitis vinifera</i>                |
| CL7275.Contig1_All | 7.25  | 3     | -1.27  | <i>Chenopodium album</i>             |
| Unigene16491_All   | 2.22  | 0.95  | -1.22  | <i>Erythranthe guttata</i>           |
| Unigene5680_All    | 4.21  | 8.78  | 1.06   | <i>Prunus mume</i>                   |
| CL7275.Contig3_All | 13.71 | 28.64 | 1.06   | <i>Chenopodium album</i>             |

|                      |       |       |       |                           |
|----------------------|-------|-------|-------|---------------------------|
| Unigene8625_All      | 26.17 | 60.65 | 1.21  | <i>Rheum australe</i>     |
| CL8162.Contig1_All   | 6.38  | 16.55 | 1.38  | <i>Vitis vinifera</i>     |
| Unigene3216_All      | 26.25 | 88.37 | 1.75  | <i>Prunus persica</i>     |
| Unigene22967_All     | 5.59  | 27.99 | 2.32  | <i>Coffea canephora</i>   |
| CL4776.Contig2_All   | 0.79  | 6.39  | 3.02  | <i>Vitis vinifera</i>     |
| Unigene10295_All     | 0.39  | 3.33  | 3.09  | <i>Phaseolus vulgaris</i> |
| Unigene10696_All     | 2.51  | 24.28 | 3.27  | <i>Citrus clementina</i>  |
| Unigene30352_All     | 0.01  | 4.42  | 8.79  | <i>Fragaria vesca</i>     |
| <b>CTR1</b>          |       |       |       |                           |
| CL9787.Contig2_All   | 54.27 | 12.38 | -2.13 | <i>Celosia argentea</i>   |
| CL4515.Contig2_All   | 1.09  | 14.59 | 3.74  | <i>Vitis vinifera</i>     |
| CL6621.Contig2_All   | 9.17  | 29.82 | 1.70  | <i>Vitis vinifera</i>     |
| CL4515.Contig1_All   | 1.31  | 7.03  | 2.42  | <i>Vitis vinifera</i>     |
| <b>casein kinase</b> |       |       |       |                           |
| CL2804.Contig4_All   | 0.01  | 4.3   | 8.75  | <i>Vitis vinifera</i>     |
| Unigene15130_All     | 19.05 | 42.97 | 1.17  | <i>Beta vulgaris</i>      |

**Table S16.** Differentially expressed genes (DEGs) related to protein kinase in leaves of *A. canescens* after 100 mM NaCl treatment for 24 h. FPKM-CL24 and FPKM-SL24 respectively indicates the FPKM value of a gene in leaves under control condition for 24 h and salt treatment for 24 h. Fold change equals to  $\log_2$  (FPKM-SL24 / FPKM-CL24). Protein refer to the protein encoded by each DEGs.

| Gene ID            | FPKM-CL24 | FPKM-SL24 | Fold change | Homologous species         |
|--------------------|-----------|-----------|-------------|----------------------------|
| <b>RLK</b>         |           |           |             |                            |
| Unigene10117_All   | 0.57      | 0.01      | -5.83       | <i>Theobroma cacao</i>     |
| Unigene16698_All   | 1.11      | 0.01      | -6.79       | <i>Prunus mume</i>         |
| CL6747.Contig2_All | 0.85      | 0.01      | -6.41       | <i>Phoenix dactylifera</i> |
| Unigene36094_All   | 0.43      | 0.01      | -5.43       | <i>Nelumbo nucifera</i>    |
| Unigene24849_All   | 0.38      | 0.01      | -5.25       | <i>Phoenix dactylifera</i> |
| CL7493.Contig1_All | 0.11      | 0.01      | -3.46       | <i>Nelumbo nucifera</i>    |
| CL2073.Contig3_All | 1.83      | 0.91      | -1.01       | <i>Vitis vinifera</i>      |
| Unigene12936_All   | 2.7       | 1.35      | -1.00       | <i>Eucalyptus grandis</i>  |
| CL4830.Contig2_All | 0.74      | 1.49      | 1.01        | <i>Vitis vinifera</i>      |
| CL4075.Contig3_All | 0.53      | 1.14      | 1.10        | <i>Vitis vinifera</i>      |
| Unigene2959_All    | 1.83      | 3.98      | 1.12        | <i>Solanum tuberosum</i>   |
| CL1604.Contig2_All | 1.36      | 3.11      | 1.19        | <i>Solanum tuberosum</i>   |
| Unigene15443_All   | 0.24      | 0.73      | 1.60        | <i>Morus notabilis</i>     |
| CL4075.Contig2_All | 0.57      | 2.47      | 2.12        | <i>Nelumbo nucifera</i>    |
| CL3685.Contig2_All | 0.17      | 2.73      | 4.01        | <i>Ricinus communis</i>    |
| CL6747.Contig1_All | 4.47      | 8.94      | 1.00        | <i>Phoenix dactylifera</i> |
| CL2893.Contig4_All | 0.85      | 2.04      | 1.26        | <i>Eucalyptus grandis</i>  |
| Unigene13701_All   | 7.55      | 20.23     | 1.42        | <i>Brassica rapa</i>       |
| CL2893.Contig5_All | 0.3       | 1.22      | 2.02        | <i>Nelumbo nucifera</i>    |

|                    |      |      |      |                                |
|--------------------|------|------|------|--------------------------------|
| Unigene9831_All    | 0.57 | 4.17 | 2.87 | <i>Nicotiano mentosiformis</i> |
| Unigene18733_All   | 0.55 | 4.44 | 3.01 | <i>Theobroma cacao</i>         |
| Unigene21989_All   | 0.01 | 0.23 | 4.52 | <i>Nelumbo nucifera</i>        |
| Unigene40680_All   | 0.01 | 0.45 | 5.49 | <i>Triticum urartu</i>         |
| CL4830.Contig1_All | 0.01 | 1.15 | 6.85 | <i>Vitis vinifera</i>          |
| Unigene1080_All    | 0.01 | 3.43 | 8.42 | <i>Solanum lycopersicum</i>    |

#### WAK

|                    |       |      |       |                             |
|--------------------|-------|------|-------|-----------------------------|
| Unigene3113_All    | 2.1   | 0.01 | -7.71 | <i>Eucalyptus grandis</i>   |
| CL8521.Contig2_All | 1.82  | 0.01 | -7.51 | <i>Eucalyptus grandis</i>   |
| CL1625.Contig3_All | 0.67  | 0.01 | -6.07 | <i>Zea mays</i>             |
| CL219.Contig10_All | 4.78  | 0.16 | -4.90 | <i>Citrus sinensis</i>      |
| CL219.Contig8_All  | 11.24 | 2.78 | -2.02 | <i>Eucalyptus grandis</i>   |
| Unigene31535_All   | 2.38  | 0.6  | -1.99 | <i>Nicotiana sylvestris</i> |
| Unigene8224_All    | 1.73  | 0.52 | -1.73 | <i>Vitis vinifera</i>       |
| CL219.Contig12_All | 9.38  | 4.19 | -1.16 | <i>Eucalyptus grandis</i>   |
| Unigene34082_All   | 1.12  | 0.56 | -1.00 | <i>Morus notabilis</i>      |
| Unigene4677_All    | 1.58  | 0.79 | -1.00 | <i>Ricinus communis</i>     |
| Unigene22036_All   | 1.13  | 2.49 | 1.14  | <i>Ricinus communis</i>     |
| CL2993.Contig1_All | 1.12  | 2.62 | 1.23  | <i>Eucalyptus grandis</i>   |
| Unigene4137_All    | 0.52  | 1.45 | 1.48  | <i>Nelumbo nucifera</i>     |
| Unigene4114_All    | 1.82  | 6.37 | 1.81  | <i>Prunus mume</i>          |
| Unigene15340_All   | 0.34  | 1.35 | 1.99  | <i>Nicotiana sylvestris</i> |
| Unigene850_All     | 0.01  | 0.12 | 3.58  | <i>Ricinus communis</i>     |
| Unigene36213_All   | 0.01  | 0.25 | 4.64  | <i>Cucumis melo</i>         |
| Unigene4688_All    | 0.01  | 3.04 | 8.25  | <i>Citrus sinensis</i>      |

#### LecRLK

|                    |      |       |       |                             |
|--------------------|------|-------|-------|-----------------------------|
| Unigene12763_All   | 3.2  | 0.01  | -8.32 | <i>Theobroma cacao</i>      |
| Unigene22602_All   | 1.27 | 0.01  | -6.99 | <i>Brassica rapa</i>        |
| CL2011.Contig2_All | 1.27 | 0.01  | -6.99 | <i>Nicotiana sylvestris</i> |
| Unigene35797_All   | 1.16 | 0.01  | -6.86 | <i>Populus trichocarpa</i>  |
| Unigene37389_All   | 0.68 | 0.01  | -6.09 | <i>Nicotiana sylvestris</i> |
| CL8967.Contig2_All | 0.6  | 0.01  | -5.91 | <i>Nicotiana sylvestris</i> |
| CL2927.Contig7_All | 3.09 | 0.87  | -1.83 | <i>Cucumis sativus</i>      |
| Unigene7652_All    | 2.29 | 0.77  | -1.57 | <i>Vitis vinifera</i>       |
| Unigene16516_All   | 1.27 | 0.43  | -1.56 | <i>Brassica rapa</i>        |
| CL865.Contig11_All | 1.37 | 3.13  | 1.19  | <i>Theobroma cacao</i>      |
| CL2927.Contig8_All | 0.38 | 0.9   | 1.24  | <i>Glycine max</i>          |
| Unigene2748_All    | 1.35 | 5     | 1.89  | <i>Vitis vinifera</i>       |
| CL3763.Contig2_All | 2.05 | 8.33  | 2.02  | <i>Nelumbo nucifera</i>     |
| CL3313.Contig1_All | 2.24 | 11.53 | 2.36  | <i>Morus notabilis</i>      |
| Unigene14705_All   | 0.26 | 1.54  | 2.57  | <i>Vitis vinifera</i>       |
| CL7452.Contig2_All | 0.01 | 0.29  | 4.86  | <i>Vitis vinifera</i>       |
| CL865.Contig6_All  | 0.01 | 0.38  | 5.25  | <i>Populus trichocarpa</i>  |



|                    |       |       |       |                                    |
|--------------------|-------|-------|-------|------------------------------------|
| CL9743.Contig2_All | 0.01  | 0.66  | 6.04  | <i>Theobroma cacao</i>             |
| CL6802.Contig1_All | 0.01  | 1.83  | 7.52  | <i>Eucalyptus grandis</i>          |
| Unigene26968_All   | 0.01  | 2.43  | 7.92  | <i>Nicotiana tomentosiformis</i>   |
| Unigene3683_All    | 0.01  | 3.4   | 8.41  | <i>Solanum lycopersicum</i>        |
| <b>LRR-RLK</b>     |       |       |       |                                    |
| CL608.Contig2_All  | 2.73  | 0.01  | -8.09 | <i>Atriplex canescens</i>          |
| CL5423.Contig1_All | 1.63  | 0.01  | -7.35 | <i>Nicotiana tomentosiformis</i>   |
| CL2928.Contig4_All | 1.15  | 0.01  | -6.85 | <i>Nelumbo nucifera</i>            |
| CL6082.Contig1_All | 0.77  | 0.01  | -6.27 | <i>Citrus sinensis</i>             |
| CL1768.Contig5_All | 0.76  | 0.01  | -6.25 | <i>Prunus mume</i>                 |
| Unigene25771_All   | 0.59  | 0.01  | -5.88 | <i>Prunus mume</i>                 |
| Unigene163_All     | 0.38  | 0.01  | -5.25 | <i>Vitis vinifera</i>              |
| Unigene29730_All   | 0.22  | 0.01  | -4.46 | <i>Cucumis sativus</i>             |
| Unigene29740_All   | 0.19  | 0.01  | -4.25 | <i>Theobroma cacao</i>             |
| CL8833.Contig2_All | 4.48  | 0.56  | -3.00 | <i>Eucalyptus grandis</i>          |
| CL6713.Contig1_All | 5.91  | 1.32  | -2.16 | <i>Solanum lycopersicum</i>        |
| Unigene2037_All    | 0.04  | 0.01  | -2.00 | <i>Theobroma cacao</i>             |
| CL1231.Contig1_All | 4.67  | 1.41  | -1.73 | <i>Theobroma cacao</i>             |
| Unigene35817_All   | 4.34  | 1.36  | -1.67 | <i>Vitis vinifera</i>              |
| Unigene11412_All   | 1.51  | 0.65  | -1.22 | <i>Pyrus x bretschneideri</i>      |
| Unigene26697_All   | 2.76  | 1.19  | -1.21 | <i>Vitis vinifera</i>              |
| Unigene11127_All   | 1.3   | 0.58  | -1.16 | <i>Theobroma cacao</i>             |
| Unigene9888_All    | 0.94  | 1.92  | 1.03  | <i>Nelumbo nucifera</i>            |
| CL7892.Contig2_All | 2.26  | 5.17  | 1.19  | <i>Prunus mume</i>                 |
| CL1803.Contig2_All | 5.32  | 12.35 | 1.22  | <i>Nelumbo nucifera</i>            |
| CL2084.Contig1_All | 2.73  | 6.76  | 1.31  | <i>Glycine max</i>                 |
| CL1803.Contig3_All | 7.1   | 19.86 | 1.48  | <i>Nelumbo nucifera</i>            |
| Unigene10870_All   | 0.03  | 0.09  | 1.58  | <i>Morus notabilis</i>             |
| CL1768.Contig6_All | 0.13  | 0.44  | 1.76  | <i>Vitis vinifera</i>              |
| CL1729.Contig4_All | 3.03  | 11.55 | 1.93  | <i>Vitis vinifera</i>              |
| Unigene3742_All    | 0.64  | 2.5   | 1.97  | <i>Vitis vinifera</i>              |
| CL7967.Contig2_All | 3.99  | 16.49 | 2.05  | <i>Nicotiana sylvestris</i>        |
| Unigene12994_All   | 2.24  | 9.49  | 2.08  | <i>Citrus sinensis</i>             |
| Unigene39769_All   | 0.12  | 0.84  | 2.81  | <i>Vitis vinifera</i>              |
| Unigene9196_All    | 2.96  | 20.8  | 2.81  | <i>Citrus sinensis</i>             |
| CL8833.Contig1_All | 0.52  | 3.94  | 2.92  | <i>Citrus sinensis</i>             |
| Unigene5596_All    | 9.7   | 82.31 | 3.09  | <i>Fragaria vesca subsp. vesca</i> |
| CL1729.Contig1_All | 0.33  | 6.01  | 4.19  | <i>Vitis vinifera</i>              |
| Unigene12746_All   | 0.05  | 0.1   | 1.00  | <i>Pyrus x bretschneideri</i>      |
| CL8233.Contig2_All | 1.94  | 3.92  | 1.01  | <i>Vitis vinifera</i>              |
| CL1803.Contig5_All | 15.01 | 30.8  | 1.04  | <i>Malus domestica</i>             |
| Unigene7620_All    | 1.59  | 3.41  | 1.10  | <i>Morus notabilis</i>             |
| CL5423.Contig2_All | 2.96  | 7.02  | 1.25  | <i>Nicotiana tomentosiformis</i>   |
| CL2928.Contig5_All | 1.08  | 2.65  | 1.29  | <i>Nelumbo nucifera</i>            |

|                           |             |             |             |                                    |
|---------------------------|-------------|-------------|-------------|------------------------------------|
| CL9137.Contig2_All        | 5.36        | 21.52       | 2.01        | <i>Vitis vinifera</i>              |
| Unigene38560_All          | 0.38        | 1.89        | 2.31        | <i>Cicer arietinum</i>             |
| CL1803.Contig1_All        | 12.83       | 74.25       | 2.53        | <i>Eucalyptus grandis</i>          |
| CL1803.Contig4_All        | 3.15        | 63.23       | 4.33        | <i>Eucalyptus grandis</i>          |
| CL8471.Contig1_All        | 0.01        | 0.15        | 3.91        | <i>Theobroma cacao</i>             |
| Unigene39444_All          | 0.01        | 0.59        | 5.88        | <i>Phoenix dactylifera</i>         |
| CL7338.Contig1_All        | 0.01        | 4.2         | 8.71        | <i>Silene latifolia</i>            |
| CL2166.Contig2_All        | 0.01        | 0.11        | 3.46        | <i>Solanum tuberosum</i>           |
| Unigene30007_All          | 0.01        | 0.25        | 4.64        | <i>Pyrus x bretschneideri</i>      |
| Unigene35311_All          | 0.01        | 0.42        | 5.39        | <i>Pyrus x bretschneideri</i>      |
| Unigene31462_All          | 0.01        | 0.63        | 5.98        | <i>Phoenix dactylifera</i>         |
| <b>LysM</b>               |             |             |             |                                    |
| Unigene40057_All          | 0.01        | 1.01        | 6.66        | <i>Pyrus x bretschneideri</i>      |
| CL6066.Contig2_All        | 0.55        | 0.01        | -5.78       | <i>Nelumbo nucifera</i>            |
| <b>CDPK</b>               |             |             |             |                                    |
| CL280.Contig5_All         | 0.68        | 0.01        | -6.09       | <i>Theobroma cacao</i>             |
| CL1897.Contig1_All        | 0.63        | 0.01        | -5.98       | <i>Nelumbo nucifera</i>            |
| Unigene4260_All           | 0.17        | 0.53        | 1.64        | <i>Theobroma cacao</i>             |
| CL6327.Contig1_All        | 3.96        | 10.01       | 1.34        | <i>Theobroma cacao</i>             |
| CL8340.Contig2_All        | 0.01        | 0.22        | 4.46        | <i>Malus domestica</i>             |
| <b>MAPK</b>               |             |             |             |                                    |
| Unigene30352_All          | 0.52        | 0.01        | -5.70       | <i>Fragaria vesca subsp. vesca</i> |
| Unigene16491_All          | 9.88        | 4.05        | -1.29       | <i>Erythranthe guttata</i>         |
| Unigene10295_All          | 0.65        | 0.28        | -1.22       | <i>Phaseolus vulgaris</i>          |
| CL578.Contig3_All         | 3.29        | 1.49        | -1.14       | <i>Citrus sinensis</i>             |
| Unigene543_All            | 1.43        | 0.71        | -1.01       |                                    |
| CL9352.Contig2_All        | 1.04        | 2.34        | 1.17        | <i>Erythranthe guttata</i>         |
| CL1892.Contig2_All        | 4.93        | 11.74       | 1.25        | <i>Vitis vinifera</i>              |
| CL578.Contig1_All         | 0.48        | 1.3         | 1.44        | <i>Citrus sinensis</i>             |
| CL4776.Contig1_All        | 0.01        | 0.78        | 6.29        | <i>Vitis vinifera</i>              |
| CL7688.Contig1_All        | 0.01        | 3.84        | 8.58        | <i>Vitis vinifera</i>              |
| <b>CTR</b>                |             |             |             |                                    |
| CL4515.Contig1_All        | 0.9         | 0.38        | -1.24       | <i>Vitis vinifera</i>              |
| <b>casein</b>             |             |             |             |                                    |
| CL2804.Contig1_All        | 4.62        | 0.01        | -8.85       | <i>Vitis vinifera</i>              |
| CL2804.Contig2_All        | 2.58        | 0.01        | -8.01       | <i>Vitis vinifera</i>              |
| CL2804.Contig13_All       | 1.17        | 0.01        | -6.87       | <i>Vitis vinifera</i>              |
| CL414.Contig3_All         | 3.97        | 1.36        | -1.55       | <i>Vitis vinifera</i>              |
| CL2804.Contig10_All       | 1.42        | 10.03       | 2.82        | <i>Vitis vinifera</i>              |
| <b>CL2804.Contig3_All</b> | <b>0.01</b> | <b>6.21</b> | <b>9.28</b> | <i>Vitis vinifera</i>              |

**Table S17.** Differentially expressed genes (DEGs) related to protein kinase in roots of *A. canescens* after 100 mM NaCl treatment for 6 h. FPKM-CR6 and FPKM-SR6 respectively indicates the FPKM value of a gene in roots under control condition for 6 h and salt treatment for 6 h. Fold change equals to  $\log_2$  (FPKM-SR6 / FPKM-CR6). Protein refer to the protein

encoded by each DEGs.

| Gene ID            | FPKM-CR6 | FPKM-SR6 | Fold change | Homologous species          |
|--------------------|----------|----------|-------------|-----------------------------|
| <b>RLK</b>         |          |          |             |                             |
| Unigene30353_All   | 2.72     | 0.01     | -8.09       | Ricinus communis            |
| CL4830.Contig1_All | 0.6      | 0.01     | -5.91       | Vitis vinifera              |
| CL4075.Contig1_All | 0.81     | 0.28     | -1.53       | Solanum tuberosum           |
| CL3685.Contig2_All | 5.02     | 1.93     | -1.38       | Ricinus communis            |
| CL7493.Contig1_All | 0.77     | 0.01     | -6.27       | Nelumbo nucifera            |
| Unigene31860_All   | 4.55     | 0.58     | -2.97       | Eucalyptus grandis          |
| Unigene603_All     | 4.12     | 1.27     | -1.70       | Theobroma cacao             |
| CL2170.Contig4_All | 2.6      | 1.24     | -1.07       | Prunus mume                 |
| CL9166.Contig2_All | 2.24     | 1.07     | -1.07       | Citrus sinensis             |
| Unigene40582_All   | 0.49     | 1.01     | 1.04        | Prunus mume                 |
| Unigene10117_All   | 0.9      | 2.45     | 1.44        | Theobroma cacao             |
| Unigene35208_All   | 0.58     | 4.19     | 2.85        | Vitis vinifera              |
| Unigene1080_All    | 0.55     | 4.81     | 3.13        | Solanum lycopersicum        |
| Unigene34019_All   | 2.2      | 5.64     | 1.36        | Vitis vinifera              |
| Unigene40680_All   | 0.47     | 1.45     | 1.63        | Triticum urartu             |
| CL4830.Contig2_All | 0.01     | 0.53     | 5.73        | Vitis vinifera              |
| Unigene38876_All   | 0.01     | 1.14     | 6.83        | Nelumbo nucifera            |
| <b>WAK</b>         |          |          |             |                             |
| CL8521.Contig2_All | 3.01     | 0.01     | -8.23       | Eucalyptus grandis          |
| CL8953.Contig1_All | 0.79     | 0.01     | -6.30       | Eucalyptus grandis          |
| CL342.Contig3_All  | 0.69     | 0.01     | -6.11       | Theobroma cacao             |
| Unigene4688_All    | 0.64     | 0.01     | -6.00       | Citrus sinensis             |
| Unigene29472_All   | 0.61     | 0.01     | -5.93       | Nicotiana glauca            |
| Unigene4677_All    | 0.28     | 0.01     | -4.81       | Ricinus communis            |
| Unigene22036_All   | 0.24     | 0.01     | -4.58       | Ricinus communis            |
| Unigene8224_All    | 0.54     | 0.19     | -1.51       | Vitis vinifera              |
| CL4189.Contig1_All | 1.92     | 0.79     | -1.28       | Vitis vinifera              |
| Unigene850_All     | 3.12     | 1.34     | -1.22       | Ricinus communis            |
| CL219.Contig4_All  | 3.48     | 7.03     | 1.01        | Nicotiana glauca            |
| Unigene36213_All   | 0.51     | 1.06     | 1.06        | Cucumis melo                |
| CL219.Contig11_All | 1.75     | 3.7      | 1.08        | Nicotiana glauca            |
| CL8521.Contig1_All | 1.42     | 4.39     | 1.63        | Eucalyptus grandis          |
| CL1625.Contig4_All | 1.31     | 4.7      | 1.84        | Solanum lycopersicum        |
| Unigene31535_All   | 0.62     | 2.56     | 2.05        | Nicotiana glauca            |
| CL7712.Contig2_All | 0.01     | 0.47     | 5.55        | Cucumis sativus             |
| Unigene34082_All   | 0.01     | 0.6      | 5.91        | Morus notabilis             |
| Unigene3113_All    | 0.01     | 0.75     | 6.23        | Eucalyptus grandis          |
| Unigene36859_All   | 0.01     | 1.1      | 6.78        | Solanum lycopersicum        |
| Unigene23885_All   | 0.01     | 1.13     | 6.82        | Fragaria vesca subsp. vesca |
| <b>LecRLK</b>      |          |          |             |                             |

|                    |      |       |       |                           |
|--------------------|------|-------|-------|---------------------------|
| CL3763.Contig2_All | 4.97 | 0.01  | -8.96 | Nelumbo nucifera          |
| Unigene35732_All   | 0.56 | 0.01  | -5.81 | Fragaria vesca            |
| Unigene12763_All   | 4.12 | 0.11  | -5.23 | Theobroma cacao           |
| Unigene16277_All   | 0.15 | 0.01  | -3.91 | Cicer arietinum           |
| Unigene9770_All    | 0.14 | 0.01  | -3.81 | Prunus mume               |
| Unigene34574_All   | 3.33 | 0.68  | -2.29 | Citrus sinensis           |
| CL2011.Contig2_All | 4.71 | 1.28  | -1.88 | Nicotiana sylvestris      |
| CL3313.Contig6_All | 1.15 | 0.39  | -1.56 | Malus domestica           |
| CL1876.Contig5_All | 1.04 | 0.45  | -1.21 | Vitis vinifera            |
| Unigene16516_All   | 4.01 | 1.98  | -1.02 | Brassica rapa             |
| CL5713.Contig2_All | 1.79 | 3.81  | 1.09  | Malus domestica           |
| CL3763.Contig1_All | 3.61 | 10.17 | 1.49  | Nelumbo nucifera          |
| Unigene38082_All   | 0.69 | 2.11  | 1.61  | Zea mays                  |
| CL1044.Contig1_All | 1.15 | 3.55  | 1.63  | Cucumis melo              |
| Unigene35797_All   | 0.7  | 2.99  | 2.09  | Populus trichocarpa       |
| CL2927.Contig7_All | 1.36 | 7.04  | 2.37  | Cucumis sativus           |
| Unigene3683_All    | 0.19 | 3.22  | 4.08  | Solanum lycopersicum      |
| CL30.Contig6_All   | 0.01 | 0.36  | 5.17  | Nicotiana tomentosiformis |
| Unigene2748_All    | 0.01 | 0.73  | 6.19  | Vitis vinifera            |
| CL4407.Contig2_All | 0.01 | 1.49  | 7.22  | Prunus mume               |
| CL9743.Contig2_All | 0.01 | 2.11  | 7.72  | Theobroma cacao           |

#### LRR-RLK

|                    |      |      |       |                             |
|--------------------|------|------|-------|-----------------------------|
| Unigene32199_All   | 2.24 | 0.01 | -7.81 | Setaria italica             |
| Unigene31458_All   | 2.18 | 0.01 | -7.77 | Eucalyptus grandis          |
| CL7338.Contig2_All | 1.66 | 0.01 | -7.38 | Dimocarpus longan           |
| Unigene25771_All   | 1.24 | 0.01 | -6.95 | Prunus mume                 |
| CL5636.Contig2_All | 0.31 | 0.01 | -4.95 | Citrus sinensis             |
| CL1803.Contig3_All | 0.21 | 0.01 | -4.39 | Nelumbo nucifera            |
| CL1768.Contig9_All | 3.12 | 0.61 | -2.35 | Prunus mume                 |
| Unigene39769_All   | 4.38 | 0.9  | -2.28 | Vitis vinifera              |
| CL9025.Contig1_All | 7.6  | 1.77 | -2.10 | Cicer arietinum             |
| CL371.Contig2_All  | 2.83 | 0.86 | -1.72 | Malus domestica             |
| Unigene33825_All   | 1.24 | 0.42 | -1.56 | Pyrus x bretschneideri      |
| Unigene31722_All   | 1.8  | 0.61 | -1.56 | Citrus sinensis             |
| Unigene12747_All   | 5.46 | 1.96 | -1.48 | Nicotiana tomentosiformis   |
| CL608.Contig2_All  | 4.89 | 2.38 | -1.04 | Atriplex canescens          |
| CL371.Contig3_All  | 1.23 | 2.5  | 1.02  | Prunus mume                 |
| Unigene39549_All   | 0.94 | 1.92 | 1.03  | Vitis vinifera              |
| Unigene30665_All   | 0.32 | 0.66 | 1.04  | Fragaria vesca subsp. vesca |
| CL1768.Contig5_All | 0.51 | 1.07 | 1.07  | Prunus mume                 |
| Unigene2009_All    | 1.74 | 4.43 | 1.35  | Vitis vinifera              |
| Unigene12746_All   | 2.97 | 7.58 | 1.35  | Pyrus x bretschneideri      |
| CL8233.Contig2_All | 0.94 | 2.68 | 1.51  | Vitis vinifera              |
| CL7338.Contig1_All | 0.49 | 3    | 2.61  | Silene latifolia            |

|                      |      |       |       |                             |
|----------------------|------|-------|-------|-----------------------------|
| CL1803.Contig2_All   | 0.01 | 0.19  | 4.25  | Nelumbo nucifera            |
| Unigene13207_All     | 0.01 | 0.34  | 5.09  | Vitis vinifera              |
| Unigene2487_All      | 0.01 | 0.41  | 5.36  | Eucalyptus grandis          |
| CL5423.Contig4_All   | 0.01 | 0.55  | 5.78  | Eucalyptus grandis          |
| CL1231.Contig3_All   | 0.01 | 0.59  | 5.88  | Theobroma cacao             |
| Unigene39444_All     | 0.01 | 1.28  | 7.00  | Phoenix dactylifera         |
| <b>LysM</b>          |      |       |       |                             |
| Unigene28415_All     | 1.77 | 3.54  | 1.00  | Cercis chinensis            |
| <b>CDPK</b>          |      |       |       |                             |
| CL3423.Contig2_All   | 2.19 | 0.01  | -7.77 | Chenopodium album           |
| CL9501.Contig1_All   | 0.9  | 0.01  | -6.49 | Nicotiana tomentosiformis   |
| CL3423.Contig1_All   | 1.87 | 3.76  | 1.01  | Chenopodium album           |
| CL6327.Contig1_All   | 5.98 | 12.03 | 1.01  | Theobroma cacao             |
| Unigene4260_All      | 0.92 | 2.07  | 1.17  | Theobroma cacao             |
| CL280.Contig8_All    | 1.15 | 2.68  | 1.22  | Theobroma cacao             |
| Unigene36941_All     | 1.63 | 4.52  | 1.47  | Populus trichocarpa         |
| CL280.Contig5_All    | 0.01 | 0.03  | 1.58  | Theobroma cacao             |
| CL3423.Contig3_All   | 0.01 | 0.2   | 4.32  | Chenopodium album           |
| <b>MAPK</b>          |      |       |       |                             |
| Unigene543_All       | 9.29 | 1.54  | -2.59 |                             |
| CL578.Contig2_All    | 1.38 | 0.53  | -1.38 | Theobroma cacao             |
| Unigene30352_All     | 0.55 | 1.12  | 1.03  | Fragaria vesca subsp. vesca |
| CL8162.Contig2_All   | 0.5  | 1.3   | 1.38  | Citrus clementina           |
| CL7688.Contig1_All   | 3.03 | 8.27  | 1.45  | Vitis vinifera              |
| Unigene6293_All      | 0.39 | 1.12  | 1.52  | Solanum lycopersicum        |
| CL1892.Contig1_All   | 0.1  | 0.53  | 2.41  | Vitis vinifera              |
| CL9694.Contig2_All   | 0.01 | 1.19  | 6.89  | Vitis vinifera              |
| CL1892.Contig2_All   | 0.01 | 1.33  | 7.06  | Vitis vinifera              |
| <b>casein kinase</b> |      |       |       |                             |
| CL2804.Contig3_All   | 5.11 | 0.01  | -9.00 | Vitis vinifera              |
| CL2804.Contig12_All  | 0.67 | 0.01  | -6.07 | Vitis vinifera              |

**Table S18.** Differentially expressed genes (DEGs) related to protein kinase in roots of *A. canescens* after 100 mM NaCl treatment for 24 h. FPKM-CR24 and FPKM-SR24 respectively indicates the FPKM value of a gene in roots under control condition for 24 h and salt treatment for 24 h. Fold change equals to  $\log_2$  (FPKM-SR24 / FPKM-CR24). Protein refer to the protein encoded by each DEGs.

| Gene ID          | FPKM-CR24 | FPKM-SR24 | Fold change | Homologous species        |
|------------------|-----------|-----------|-------------|---------------------------|
| <b>RLK</b>       |           |           |             |                           |
| Unigene30353_All | 2.7       | 0.01      | -8.08       | <i>Ricinus communis</i>   |
| Unigene36621_All | 1.82      | 0.01      | -7.51       | <i>Eucalyptus grandis</i> |
| Unigene15443_All | 0.5       | 0.01      | -5.64       | <i>Morus notabilis</i>    |

|                    |       |       |        |                                          |
|--------------------|-------|-------|--------|------------------------------------------|
| Unigene12732_All   | 7.05  | 0.19  | -5.21  | <i>Ricinus communis</i>                  |
| Unigene2959_All    | 6.02  | 1.54  | -1.97  | <i>Solanum tuberosum</i>                 |
| Unigene40582_All   | 3.41  | 0.95  | -1.84  | <i>Prunus mume</i>                       |
| CL4075.Contig3_All | 4.27  | 1.34  | -1.67  | <i>Vitis vinifera</i>                    |
| CL1604.Contig1_All | 17.68 | 5.99  | -1.56  | <i>Vitis vinifera</i>                    |
| Unigene7507_All    | 2.18  | 0.76  | -1.52  | <i>Morus notabilis</i>                   |
| CL1604.Contig3_All | 9.92  | 3.56  | -1.48  | <i>Vitis vinifera</i>                    |
| Unigene11654_All   | 31    | 14.89 | -1.06  | <i>Nicotiana glauca</i>                  |
| Unigene10117_All   | 1.18  | 0.57  | -1.05  | <i>Theobroma cacao</i>                   |
| CL3685.Contig2_All | 3.91  | 1.89  | -1.05  | <i>Ricinus communis</i>                  |
| CL1604.Contig2_All | 1.82  | 0.88  | -1.05  | <i>Solanum tuberosum</i>                 |
| Unigene13978_All   | 85.36 | 0.08  | -10.06 | <i>Pyrus x bretschneideri</i>            |
| CL2170.Contig5_All | 5.99  | 0.01  | -9.23  | <i>Nelumbo nucifera</i>                  |
| Unigene616_All     | 2.59  | 0.01  | -8.02  | <i>Theobroma cacao</i>                   |
| CL3305.Contig2_All | 1.48  | 0.01  | -7.21  | <i>Nelumbo nucifera</i>                  |
| CL7493.Contig1_All | 1.45  | 0.01  | -7.18  | <i>Nelumbo nucifera</i>                  |
| CL7451.Contig5_All | 1.36  | 0.01  | -7.09  | <i>Phoenix dactylifera</i>               |
| Unigene33490_All   | 1.27  | 0.01  | -6.99  | <i>Pyrus x bretschneideri</i>            |
| CL5638.Contig4_All | 1.04  | 0.01  | -6.70  | <i>Vitis vinifera</i>                    |
| Unigene36094_All   | 0.9   | 0.01  | -6.49  | <i>Nelumbo nucifera</i>                  |
| CL2170.Contig3_All | 0.77  | 0.01  | -6.27  | <i>Morus notabilis</i>                   |
| Unigene9831_All    | 3.72  | 0.19  | -4.29  | <i>Nicotiana glauca</i>                  |
| CL7493.Contig2_All | 27.06 | 2.23  | -3.60  | <i>Nelumbo nucifera</i>                  |
| Unigene15867_All   | 6.97  | 0.59  | -3.56  | <i>Vitis vinifera</i>                    |
| Unigene34017_All   | 1.91  | 0.22  | -3.12  | <i>Nelumbo nucifera</i>                  |
| CL2170.Contig4_All | 3.33  | 0.63  | -2.40  | <i>Prunus mume</i>                       |
| CL2073.Contig3_All | 3.64  | 0.77  | -2.24  | <i>Vitis vinifera</i>                    |
| Unigene29556_All   | 2.27  | 0.49  | -2.21  | <i>Malus domestica</i>                   |
| CL6747.Contig1_All | 6.88  | 1.78  | -1.95  | <i>Phoenix dactylifera</i>               |
| Unigene17553_All   | 13.41 | 3.52  | -1.93  | <i>Prunus mume</i>                       |
| Unigene30033_All   | 3.63  | 1.06  | -1.78  | <i>Musa acuminata subsp. malaccensis</i> |
| Unigene12936_All   | 2.93  | 0.99  | -1.57  | <i>Eucalyptus grandis</i>                |
| CL264.Contig1_All  | 59.77 | 21.55 | -1.47  | <i>Vitis vinifera</i>                    |
| Unigene16763_All   | 11.85 | 4.46  | -1.41  | <i>Prunus mume</i>                       |
| CL2073.Contig1_All | 3.46  | 1.37  | -1.34  | <i>Vitis vinifera</i>                    |
| Unigene3618_All    | 99.71 | 46.46 | -1.10  | <i>Vitis vinifera</i>                    |
| Unigene18733_All   | 1.15  | 0.56  | -1.04  | <i>Theobroma cacao</i>                   |
| Unigene21989_All   | 2.39  | 1.18  | -1.02  | <i>Nelumbo nucifera</i>                  |
| CL6175.Contig1_All | 2.22  | 5.99  | 1.43   | <i>Vitis vinifera</i>                    |
| Unigene39347_All   | 0.93  | 2.71  | 1.54   | <i>Nelumbo nucifera</i>                  |
| Unigene13701_All   | 1.69  | 19.9  | 3.56   | <i>Brassica rapa</i>                     |
| CL1768.Contig7_All | 0.31  | 5.68  | 4.20   | <i>Prunus mume</i>                       |
| Unigene14535_All   | 0.31  | 5.99  | 4.27   | <i>Theobroma cacao</i>                   |
| CL4075.Contig1_All | 0.53  | 1.29  | 1.28   | <i>Solanum tuberosum</i>                 |

|                    |        |       |        |                                    |
|--------------------|--------|-------|--------|------------------------------------|
| Unigene16773_All   | 2.23   | 7.66  | 1.78   | <i>Theobroma cacao</i>             |
| Unigene39455_All   | 0.01   | 0.64  | 6.00   | <i>Arabidopsis thaliana</i>        |
| <b>WAK</b>         |        |       |        |                                    |
| CL171.Contig1_All  | 3.8    | 0.01  | -8.57  | <i>Medicago truncatula</i>         |
| Unigene36213_All   | 3.06   | 0.01  | -8.26  | <i>Cucumis melo</i>                |
| Unigene35516_All   | 2.48   | 0.01  | -7.95  | <i>Nelumbo nucifera</i>            |
| Unigene14495_All   | 2.34   | 0.01  | -7.87  | <i>Citrus sinensis</i>             |
| CL8953.Contig1_All | 2.34   | 0.01  | -7.87  | <i>Eucalyptus grandis</i>          |
| CL1625.Contig3_All | 1.38   | 0.01  | -7.11  | <i>Zea mays</i>                    |
| Unigene31535_All   | 1.24   | 0.01  | -6.95  | <i>Nicotiana sylvestris</i>        |
| Unigene40387_All   | 1.23   | 0.01  | -6.94  | <i>Zea mays</i>                    |
| Unigene23885_All   | 1.09   | 0.01  | -6.77  | <i>Fragaria vesca subsp. vesca</i> |
| Unigene36859_All   | 1.06   | 0.01  | -6.73  | <i>Solanum lycopersicum</i>        |
| Unigene39008_All   | 0.67   | 0.01  | -6.07  | <i>Nelumbo nucifera</i>            |
| CL7712.Contig3_All | 15.73  | 0.24  | -6.03  | <i>Nelumbo nucifera</i>            |
| Unigene29472_All   | 0.61   | 0.01  | -5.93  | <i>Nicotiana sylvestris</i>        |
| Unigene34082_All   | 0.58   | 0.01  | -5.86  | <i>Morus notabilis</i>             |
| CL7712.Contig1_All | 14.49  | 0.4   | -5.18  | <i>Nelumbo nucifera</i>            |
| Unigene16011_All   | 24.73  | 0.69  | -5.16  | <i>Nelumbo nucifera</i>            |
| Unigene29407_All   | 8.2    | 0.39  | -4.39  | <i>Vitis vinifera</i>              |
| CL6066.Contig1_All | 7.35   | 0.42  | -4.13  | <i>Ricinus communis</i>            |
| CL1625.Contig1_All | 4.88   | 0.63  | -2.95  | <i>Nelumbo nucifera</i>            |
| Unigene850_All     | 2.7    | 0.37  | -2.87  | <i>Ricinus communis</i>            |
| Unigene15340_All   | 5.59   | 1.02  | -2.45  | <i>Nicotiana sylvestris</i>        |
| CL2993.Contig2_All | 1.99   | 0.41  | -2.28  | <i>Fragaria vesca subsp. vesca</i> |
| CL219.Contig7_All  | 6.04   | 1.95  | -1.63  | <i>Nelumbo nucifera</i>            |
| CL8521.Contig2_All | 3.01   | 1.18  | -1.35  | <i>Eucalyptus grandis</i>          |
| Unigene5171_All    | 191.89 | 90.55 | -1.08  | <i>Nicotiana sylvestris</i>        |
| CL2993.Contig1_All | 0.77   | 1.95  | 1.34   | <i>Eucalyptus grandis</i>          |
| Unigene4114_All    | 0.86   | 2.83  | 1.72   | <i>Prunus mume</i>                 |
| Unigene20305_All   | 0.33   | 3.22  | 3.29   | <i>Citrus sinensis</i>             |
| Unigene8224_All    | 0.18   | 3.13  | 4.12   | <i>Vitis vinifera</i>              |
| CL7712.Contig2_All | 0.08   | 2.22  | 4.79   | <i>Cucumis sativus</i>             |
| CL342.Contig3_All  | 0.01   | 0.66  | 6.04   | <i>Theobroma cacao</i>             |
| CL219.Contig10_All | 0.01   | 1.13  | 6.82   | <i>Citrus sinensis</i>             |
| Unigene22036_All   | 0.01   | 2.05  | 7.68   | <i>Ricinus communis</i>            |
| Unigene4677_All    | 0.01   | 2.13  | 7.73   | <i>Ricinus communis</i>            |
| Unigene2643_All    | 0.01   | 5.09  | 8.99   | <i>Theobroma cacao</i>             |
| <b>LecRLK</b>      |        |       |        |                                    |
| CL2011.Contig2_All | 10.71  | 0.01  | -10.06 | <i>Nicotiana sylvestris</i>        |
| CL3313.Contig6_All | 4.94   | 0.01  | -8.95  | <i>Malus domestica</i>             |
| CL9743.Contig2_All | 2.71   | 0.01  | -8.08  | <i>Theobroma cacao</i>             |
| Unigene20530_All   | 1.64   | 0.01  | -7.36  | <i>Theobroma cacao</i>             |

|                    |       |       |       |                                    |
|--------------------|-------|-------|-------|------------------------------------|
| Unigene22602_All   | 1.32  | 0.01  | -7.04 | <i>Brassica rapa</i>               |
| Unigene34574_All   | 1.32  | 0.01  | -7.04 | <i>Citrus sinensis</i>             |
| CL6802.Contig1_All | 1.26  | 0.01  | -6.98 | <i>Eucalyptus grandis</i>          |
| Unigene40630_All   | 1.15  | 0.01  | -6.85 | <i>Theobroma cacao</i>             |
| Unigene18214_All   | 31.98 | 0.6   | -5.74 | <i>Eucalyptus grandis</i>          |
| CL1876.Contig4_All | 30.03 | 0.81  | -5.21 | <i>Vitis vinifera</i>              |
| CL1876.Contig1_All | 12.49 | 0.34  | -5.20 | <i>Vitis vinifera</i>              |
| Unigene40469_All   | 0.35  | 0.01  | -5.13 | <i>Populus trichocarpa</i>         |
| CL389.Contig2_All  | 7.62  | 0.63  | -3.60 | <i>Vitis vinifera</i>              |
| Unigene26968_All   | 3.02  | 0.34  | -3.15 | <i>Nicotiana tomentosiformis</i>   |
| CL2011.Contig1_All | 18.29 | 2.1   | -3.12 | <i>Citrus sinensis</i>             |
| Unigene29873_All   | 1.19  | 0.14  | -3.09 | <i>Theobroma cacao</i>             |
| CL1044.Contig1_All | 3.43  | 0.55  | -2.64 | <i>Cucumis melo</i>                |
| CL3313.Contig1_All | 26.53 | 4.29  | -2.63 | <i>Morus notabilis</i>             |
| CL8882.Contig1_All | 8.44  | 1.39  | -2.60 | <i>Citrus sinensis</i>             |
| Unigene3944_All    | 2.95  | 0.54  | -2.45 | <i>Vitis vinifera</i>              |
| Unigene7995_All    | 2.44  | 0.47  | -2.38 | <i>Nelumbo nucifera</i>            |
| CL1876.Contig2_All | 12.89 | 2.53  | -2.35 | <i>Vitis vinifera</i>              |
| Unigene12173_All   | 9.06  | 2.05  | -2.14 | <i>Nelumbo nucifera</i>            |
| Unigene14705_All   | 1.96  | 0.46  | -2.09 | <i>Vitis vinifera</i>              |
| CL2927.Contig1_All | 8.98  | 2.18  | -2.04 | <i>Cucumis sativus</i>             |
| Unigene35732_All   | 2.21  | 0.54  | -2.03 | <i>Fragaria vesca subsp. vesca</i> |
| CL7452.Contig2_All | 2.13  | 0.55  | -1.95 | <i>Vitis vinifera</i>              |
| CL232.Contig6_All  | 7.3   | 2.34  | -1.64 | <i>Morus notabilis</i>             |
| CL136.Contig1_All  | 9.28  | 2.99  | -1.63 | <i>Nicotiana tomentosiformis</i>   |
| CL3763.Contig3_All | 2.31  | 0.76  | -1.60 | <i>Nelumbo nucifera</i>            |
| Unigene14931_All   | 4.04  | 1.51  | -1.42 | <i>Prunus mume</i>                 |
| CL30.Contig9_All   | 3.1   | 1.17  | -1.41 | <i>Eucalyptus grandis</i>          |
| CL2927.Contig2_All | 6.87  | 2.62  | -1.39 | <i>Cucumis sativus</i>             |
| CL5713.Contig2_All | 3.39  | 1.3   | -1.38 | <i>Malus domestica</i>             |
| CL3763.Contig1_All | 7.53  | 3.11  | -1.28 | <i>Nelumbo nucifera</i>            |
| CL2927.Contig4_All | 7.46  | 3.12  | -1.26 | <i>Cucumis sativus</i>             |
| Unigene16894_All   | 26.1  | 11.01 | -1.25 | <i>Theobroma cacao</i>             |
| Unigene12686_All   | 2.59  | 1.13  | -1.20 | <i>Vitis vinifera</i>              |
| Unigene27493_All   | 2.1   | 1.02  | -1.04 | <i>Vitis vinifera</i>              |
| Unigene114_All     | 1.56  | 0.76  | -1.04 | <i>Vitis vinifera</i>              |
| CL1876.Contig5_All | 0.92  | 1.94  | 1.08  | <i>Vitis vinifera</i>              |
| Unigene7652_All    | 1.06  | 2.57  | 1.28  | <i>Vitis vinifera</i>              |
| CL2927.Contig7_All | 0.62  | 1.81  | 1.55  | <i>Cucumis sativus</i>             |
| CL2927.Contig3_All | 1.36  | 4.03  | 1.57  | <i>Theobroma cacao</i>             |
| CL1044.Contig2_All | 1.12  | 4.1   | 1.87  | <i>Vitis vinifera</i>              |
| Unigene37389_All   | 0.35  | 1.36  | 1.96  | <i>Nicotiana sylvestris</i>        |
| Unigene2748_All    | 0.28  | 1.09  | 1.96  | <i>Vitis vinifera</i>              |
| CL4407.Contig1_All | 1.61  | 9.13  | 2.50  | <i>Malus domestica</i>             |



|                    |      |       |       |                             |
|--------------------|------|-------|-------|-----------------------------|
| CL8967.Contig2_All | 0.31 | 1.8   | 2.54  | <i>Nicotiana sylvestris</i> |
| CL865.Contig11_All | 0.17 | 3.72  | 4.45  | <i>Theobroma cacao</i>      |
| CL7244.Contig1_All | 0.01 | 0.58  | 5.86  | <i>Vitis vinifera</i>       |
| CL3763.Contig2_All | 0.01 | 0.64  | 6.00  | <i>Nelumbo nucifera</i>     |
| CL4407.Contig2_All | 0.01 | 0.89  | 6.48  | <i>Prunus mume</i>          |
| CL7244.Contig2_All | 0.01 | 2.32  | 7.86  | <i>Nelumbo nucifera</i>     |
| CL9096.Contig2_All | 0.01 | 3.18  | 8.31  | <i>Vitis vinifera</i>       |
| Unigene9770_All    | 0.01 | 6.98  | 9.45  | <i>Prunus mume</i>          |
| Unigene16277_All   | 0.01 | 19.63 | 10.94 | <i>Cicer arietinum</i>      |

#### LRR-RLK

|                    |        |       |        |                                          |
|--------------------|--------|-------|--------|------------------------------------------|
| CL1483.Contig1_All | 19.47  | 4.68  | -2.06  | <i>Nicotiana sylvestris</i>              |
| CL1729.Contig1_All | 1.3    | 0.49  | -1.41  | <i>Vitis vinifera</i>                    |
| CL1729.Contig3_All | 0.79   | 0.01  | -6.30  | <i>Musa acuminata subsp. malaccensis</i> |
| CL1729.Contig4_All | 4.51   | 1.16  | -1.96  | <i>Vitis vinifera</i>                    |
| CL1768.Contig6_All | 2.74   | 0.01  | -8.10  | <i>Vitis vinifera</i>                    |
| CL1768.Contig9_All | 2      | 0.51  | -1.97  | <i>Prunus mume</i>                       |
| CL1909.Contig2_All | 8.97   | 3.72  | -1.27  | <i>Nicotiana tomentosiformis</i>         |
| CL2084.Contig1_All | 116.75 | 3.11  | -5.23  | <i>Glycine max</i>                       |
| CL2166.Contig2_All | 27.16  | 0.01  | -11.41 | <i>Solanum tuberosum</i>                 |
| CL371.Contig2_All  | 2.22   | 0.34  | -2.71  | <i>Malus domestica</i>                   |
| CL371.Contig3_All  | 2.65   | 0.01  | -8.05  | <i>Prunus mume</i>                       |
| CL4321.Contig1_All | 28.78  | 10.11 | -1.51  | <i>Vitis vinifera</i>                    |
| CL4514.Contig2_All | 18.08  | 5.48  | -1.72  | <i>Solanum lycopersicum</i>              |
| CL4705.Contig1_All | 13.01  | 3.45  | -1.91  | <i>Vitis vinifera</i>                    |
| CL5636.Contig2_All | 0.26   | 0.01  | -4.70  | <i>Citrus sinensis</i>                   |
| CL6082.Contig1_All | 0.42   | 0.01  | -5.39  | <i>Citrus sinensis</i>                   |
| CL652.Contig2_All  | 19.06  | 7.31  | -1.38  | <i>Nelumbo nucifera</i>                  |
| CL6713.Contig3_All | 15.21  | 5.25  | -1.53  | <i>Vitis vinifera</i>                    |
| CL7365.Contig2_All | 6.23   | 1.99  | -1.65  | <i>Vitis vinifera</i>                    |
| CL7879.Contig1_All | 18.18  | 5.57  | -1.71  | <i>Prunus mume</i>                       |
| CL7879.Contig2_All | 26.14  | 6.71  | -1.96  | <i>Prunus mume</i>                       |
| CL7881.Contig2_All | 11.66  | 1.16  | -3.33  | <i>Pyrus x bretschneideri</i>            |
| CL7892.Contig2_All | 6.95   | 2.49  | -1.48  | <i>Prunus mume</i>                       |
| CL9025.Contig1_All | 2.69   | 1.28  | -1.07  | <i>Cicer arietinum</i>                   |
| CL974.Contig2_All  | 8.5    | 0.91  | -3.22  | <i>Citrus sinensis</i>                   |
| Unigene10870_All   | 3.76   | 0.03  | -6.97  | <i>Morus notabilis</i>                   |
| Unigene12036_All   | 61.3   | 0.01  | -12.58 | <i>Fragaria vesca subsp. vesca</i>       |
| Unigene12994_All   | 4.46   | 1.21  | -1.88  | <i>Citrus sinensis</i>                   |
| Unigene13054_All   | 4.26   | 1.44  | -1.56  | <i>Vitis vinifera</i>                    |
| Unigene14583_All   | 6.58   | 0.01  | -9.36  | <i>Malus domestica</i>                   |
| Unigene1518_All    | 20.9   | 5.36  | -1.96  | <i>Malus domestica</i>                   |
| Unigene16745_All   | 33.27  | 15.56 | -1.10  | <i>Theobroma cacao</i>                   |
| Unigene1911_All    | 6.26   | 0.08  | -6.29  | <i>Prunus mume</i>                       |
| Unigene2462_All    | 98.07  | 29.77 | -1.72  | <i>Prunus mume</i>                       |

|                    |        |       |        |                                    |
|--------------------|--------|-------|--------|------------------------------------|
| Unigene27010_All   | 1.51   | 0.75  | -1.01  | <i>Malus domestica</i>             |
| Unigene30665_All   | 0.96   | 0.01  | -6.58  | <i>Fragaria vesca subsp. vesca</i> |
| Unigene31458_All   | 2.15   | 0.01  | -7.75  | <i>Eucalyptus grandis</i>          |
| Unigene3321_All    | 13.42  | 3.34  | -2.01  | <i>Vitis vinifera</i>              |
| Unigene33825_All   | 2.04   | 0.79  | -1.37  | <i>Pyrus x bretschneideri</i>      |
| Unigene35162_All   | 1.1    | 0.01  | -6.78  | <i>Eucalyptus grandis</i>          |
| Unigene35960_All   | 6.18   | 0.01  | -9.27  | <i>Fragaria vesca subsp. vesca</i> |
| Unigene37147_All   | 4.29   | 0.01  | -8.74  | <i>Nicotiana tomentosiformis</i>   |
| Unigene39549_All   | 1.39   | 0.01  | -7.12  | <i>Vitis vinifera</i>              |
| Unigene39769_All   | 4.83   | 0.48  | -3.33  | <i>Vitis vinifera</i>              |
| Unigene4286_All    | 8.02   | 1.67  | -2.26  | <i>Vitis vinifera</i>              |
| Unigene4401_All    | 25.84  | 8.48  | -1.61  | <i>Vitis vinifera</i>              |
| Unigene450_All     | 6.96   | 0.01  | -9.44  | <i>Nelumbo nucifera</i>            |
| Unigene5596_All    | 187.25 | 65.7  | -1.51  | <i>Fragaria vesca subsp. vesca</i> |
| Unigene6674_All    | 14.49  | 2.93  | -2.31  | <i>Prunus mume</i>                 |
| Unigene9888_All    | 1.69   | 0.63  | -1.42  | <i>Nelumbo nucifera</i>            |
| CL2084.Contig2_All | 127.68 | 4.8   | -4.73  | <i>Vitis vinifera</i>              |
| CL2166.Contig1_All | 34.41  | 0.01  | -11.75 | <i>Vitis vinifera</i>              |
| CL2166.Contig3_All | 20.79  | 0.01  | -11.02 | <i>Vitis vinifera</i>              |
| CL2166.Contig4_All | 23.27  | 0.01  | -11.18 | <i>Vitis vinifera</i>              |
| CL2928.Contig4_All | 6.5    | 0.01  | -9.34  | <i>Nelumbo nucifera</i>            |
| CL2928.Contig5_All | 11.53  | 1.44  | -3.00  | <i>Nelumbo nucifera</i>            |
| CL5423.Contig4_All | 0.53   | 0.01  | -5.73  | <i>Eucalyptus grandis</i>          |
| CL8471.Contig2_All | 20.8   | 6.74  | -1.63  | <i>Theobroma cacao</i>             |
| CL9535.Contig1_All | 37.85  | 15.55 | -1.28  | <i>Theobroma cacao</i>             |
| Unigene10979_All   | 15.46  | 2.54  | -2.61  | <i>Arabidopsis thaliana</i>        |
| Unigene11029_All   | 2.47   | 0.46  | -2.42  | <i>Populus trichocarpa</i>         |
| Unigene11338_All   | 3.84   | 0.65  | -2.56  | <i>Pyrus x bretschneideri</i>      |
| Unigene11487_All   | 39.09  | 8.72  | -2.16  | <i>Vitis vinifera</i>              |
| Unigene11535_All   | 36.34  | 1.12  | -5.02  | <i>Morus notabilis</i>             |
| Unigene12746_All   | 3.63   | 0.01  | -8.50  | <i>Pyrus x bretschneideri</i>      |
| Unigene12747_All   | 5.46   | 0.05  | -6.77  | <i>Nicotiana tomentosiformis</i>   |
| Unigene12904_All   | 8.34   | 2.14  | -1.96  | <i>Vitis vinifera</i>              |
| Unigene13104_All   | 5.28   | 2.63  | -1.01  | <i>Theobroma cacao</i>             |
| Unigene162_All     | 11.23  | 0.41  | -4.78  | <i>Theobroma cacao</i>             |
| Unigene163_All     | 3.17   | 0.53  | -2.58  | <i>Vitis vinifera</i>              |
| Unigene16398_All   | 28.49  | 1.79  | -3.99  | <i>Theobroma cacao</i>             |
| Unigene17179_All   | 19.6   | 4.44  | -2.14  | <i>Vitis vinifera</i>              |
| Unigene2037_All    | 4.32   | 0.01  | -8.75  | <i>Theobroma cacao</i>             |
| Unigene239_All     | 17.73  | 1.18  | -3.91  | <i>Nicotiana tomentosiformis</i>   |
| Unigene29730_All   | 2.31   | 0.22  | -3.39  | <i>Cucumis sativus</i>             |
| Unigene29740_All   | 2.06   | 0.1   | -4.36  | <i>Theobroma cacao</i>             |
| Unigene2979_All    | 11.15  | 4     | -1.48  | <i>Vitis vinifera</i>              |
| Unigene31266_All   | 1.43   | 0.01  | -7.16  | <i>Ricinus communis</i>            |

|                    |       |       |       |                               |
|--------------------|-------|-------|-------|-------------------------------|
| Unigene36355_All   | 1.35  | 0.01  | -7.08 | <i>Solanum tuberosum</i>      |
| Unigene38082_All   | 1.36  | 0.01  | -7.09 | <i>Zea mays</i>               |
| Unigene38560_All   | 1.17  | 0.01  | -6.87 | <i>Cicer arietinum</i>        |
| Unigene39444_All   | 1.23  | 0.01  | -6.94 | <i>Phoenix dactylifera</i>    |
| Unigene4127_All    | 5.93  | 2.73  | -1.12 | <i>Theobroma cacao</i>        |
| Unigene5546_All    | 5.75  | 2.04  | -1.49 | <i>Nicotiana glauca</i>       |
| Unigene5661_All    | 6.14  | 0.39  | -3.98 | <i>Nelumbo nucifera</i>       |
| Unigene6058_All    | 9.98  | 3.36  | -1.57 | <i>Ricinus communis</i>       |
| Unigene6612_All    | 19.66 | 2.42  | -3.02 | <i>Theobroma cacao</i>        |
| Unigene6664_All    | 16.82 | 7.14  | -1.24 | <i>Citrus sinensis</i>        |
| Unigene5989_All    | 4.33  | 9.33  | 1.11  | <i>Nicotiana glauca</i>       |
| Unigene11342_All   | 1.04  | 2.35  | 1.18  | <i>Eucalyptus grandis</i>     |
| CL1768.Contig5_All | 0.33  | 0.84  | 1.35  | <i>Prunus mume</i>            |
| Unigene9196_All    | 1.3   | 4.09  | 1.65  | <i>Citrus sinensis</i>        |
| CL1803.Contig2_All | 0.72  | 10.05 | 3.80  | <i>Nelumbo nucifera</i>       |
| CL1803.Contig3_All | 0.19  | 53.68 | 8.14  | <i>Nelumbo nucifera</i>       |
| CL7338.Contig2_All | 0.55  | 1.59  | 1.53  | <i>Dimocarpus longan</i>      |
| CL9137.Contig2_All | 1.35  | 3.98  | 1.56  | <i>Vitis vinifera</i>         |
| CL4352.Contig1_All | 6.01  | 19.47 | 1.70  | <i>Morus notabilis</i>        |
| CL5874.Contig2_All | 0.96  | 3.25  | 1.76  | <i>Theobroma cacao</i>        |
| Unigene16773_All   | 2.23  | 7.66  | 1.78  | <i>Theobroma cacao</i>        |
| Unigene2009_All    | 1.69  | 6.34  | 1.91  | <i>Vitis vinifera</i>         |
| Unigene1046_All    | 17.21 | 66.09 | 1.94  | <i>Vitis vinifera</i>         |
| CL7338.Contig1_All | 0.48  | 1.87  | 1.96  | <i>Silene latifolia</i>       |
| Unigene7620_All    | 0.94  | 4.75  | 2.34  | <i>Morus notabilis</i>        |
| Unigene15613_All   | 3.23  | 17.89 | 2.47  | <i>Populus trichocarpa</i>    |
| CL8233.Contig1_All | 0.46  | 2.73  | 2.57  | <i>Vitis vinifera</i>         |
| CL5423.Contig2_All | 1.44  | 8.86  | 2.62  | <i>Nicotiana glauca</i>       |
| CL5423.Contig3_All | 1.64  | 14.19 | 3.11  | <i>Nicotiana glauca</i>       |
| Unigene7808_All    | 0.78  | 23.89 | 4.94  | <i>Vitis vinifera</i>         |
| CL1803.Contig1_All | 1.17  | 48.21 | 5.36  | <i>Eucalyptus grandis</i>     |
| CL1803.Contig5_All | 0.35  | 30.97 | 6.47  | <i>Malus domestica</i>        |
| CL1231.Contig1_All | 0.01  | 2.56  | 8.00  | <i>Theobroma cacao</i>        |
| Unigene26697_All   | 0.01  | 3.3   | 8.37  | <i>Vitis vinifera</i>         |
| CL1803.Contig4_All | 0.01  | 61.6  | 12.59 | <i>Eucalyptus grandis</i>     |
| Unigene35311_All   | 0.01  | 0.85  | 6.41  | <i>Pyrus x bretschneideri</i> |
| Unigene32199_All   | 0.01  | 1.08  | 6.75  | <i>Setaria italica</i>        |
| Unigene35817_All   | 0.01  | 1.64  | 7.36  | <i>Vitis vinifera</i>         |
| Unigene31462_All   | 0.01  | 1.88  | 7.55  | <i>Phoenix dactylifera</i>    |
| Unigene13207_All   | 0.01  | 2.9   | 8.18  | <i>Vitis vinifera</i>         |
| <b>LysM</b>        |       |       |       |                               |
| CL6066.Contig2_All | 5.16  | 0.01  | -9.01 | <i>Nelumbo nucifera</i>       |
| Unigene28415_All   | 4.25  | 0.01  | -8.73 | <i>Cercis chinensis</i>       |
| CL4753.Contig2_All | 3.77  | 0.46  | -3.03 | <i>Nelumbo nucifera</i>       |

|                    |        |       |       |                                      |
|--------------------|--------|-------|-------|--------------------------------------|
| Unigene3594_All    | 6.28   | 2.99  | -1.07 | <i>Nelumbo nucifera</i>              |
| <b>CDPK</b>        |        |       |       |                                      |
| CL8340.Contig1_All | 14.93  | 1     | -3.90 | <i>Theobroma cacao</i>               |
| Unigene9182_All    | 24.42  | 3.51  | -2.80 | <i>Theobroma cacao</i>               |
| CL4209.Contig1_All | 6.03   | 0.88  | -2.78 | <i>Theobroma cacao</i>               |
| Unigene18397_All   | 5.01   | 0.79  | -2.66 | <i>Haloxylon ammodendron</i>         |
| Unigene2132_All    | 2.72   | 0.8   | -1.77 | <i>Malus domestica</i>               |
| Unigene7837_All    | 60.39  | 18.57 | -1.70 | <i>Vitis vinifera</i>                |
| Unigene299_All     | 1.72   | 0.53  | -1.70 | <i>Prunus mume</i>                   |
| Unigene3918_All    | 1.97   | 0.64  | -1.62 | <i>Brassica rapa</i>                 |
| CL5216.Contig1_All | 23.61  | 7.81  | -1.60 | <i>Mesembryanthemum crystallinum</i> |
| Unigene36941_All   | 2.88   | 1.08  | -1.42 | <i>Populus trichocarpa</i>           |
| CL4396.Contig1_All | 28.05  | 11.19 | -1.33 | <i>Theobroma cacao</i>               |
| CL297.Contig8_All  | 10.18  | 4.12  | -1.31 | <i>Ricinus communis</i>              |
| CL4396.Contig2_All | 39.52  | 16.04 | -1.30 | <i>Theobroma cacao</i>               |
| CL2236.Contig3_All | 15.03  | 6.68  | -1.17 | <i>Haloxylon ammodendron</i>         |
| CL2236.Contig4_All | 16.73  | 7.85  | -1.09 | <i>Haloxylon ammodendron</i>         |
| CL280.Contig5_All  | 1.27   | 0.62  | -1.03 | <i>Theobroma cacao</i>               |
| CL2236.Contig1_All | 10.01  | 4.9   | -1.03 | <i>Haloxylon ammodendron</i>         |
| CL280.Contig4_All  | 1.48   | 3.12  | 1.08  | <i>Theobroma cacao</i>               |
| <b>MAPK</b>        |        |       |       |                                      |
| CL4776.Contig2_All | 3.16   | 0.01  | -8.30 | <i>Vitis vinifera</i>                |
| Unigene22967_All   | 41.09  | 3.97  | -3.37 | <i>Coffea canephora</i>              |
| Unigene10295_All   | 5.84   | 0.74  | -2.98 | <i>Phaseolus vulgaris</i>            |
| CL3454.Contig4_All | 19.79  | 2.81  | -2.82 | <i>Humulus lupulus</i>               |
| Unigene6293_All    | 17.73  | 2.66  | -2.74 | <i>Solanum lycopersicum</i>          |
| Unigene10696_All   | 14.21  | 2.39  | -2.57 | <i>Citrus clementina</i>             |
| CL3454.Contig2_All | 82.51  | 14.81 | -2.48 | <i>Arabis alpina</i>                 |
| Unigene543_All     | 14.46  | 3.2   | -2.18 |                                      |
| CL3454.Contig3_All | 141.08 | 32.93 | -2.10 | <i>Humulus lupulus</i>               |
| CL3454.Contig1_All | 120.76 | 29.21 | -2.05 | <i>Humulus lupulus</i>               |
| Unigene8714_All    | 49.14  | 14.35 | -1.78 | <i>Medicago truncatula</i>           |
| Unigene8714_All    | 49.14  | 14.35 | -1.78 | <i>Medicago truncatula</i>           |
| Unigene3216_All    | 46.08  | 14.29 | -1.69 | <i>Prunus persica</i>                |
| CL9352.Contig2_All | 11.11  | 3.49  | -1.67 | <i>Erythranthe guttata</i>           |
| CL7275.Contig1_All | 6.97   | 2.36  | -1.56 | <i>Chenopodium album</i>             |
| CL3427.Contig1_All | 35.9   | 13.35 | -1.43 | <i>Beta vulgaris</i>                 |
| CL7275.Contig2_All | 19.06  | 7.92  | -1.27 | <i>Chenopodium album</i>             |
| CL7275.Contig3_All | 26.87  | 11.28 | -1.25 | <i>Chenopodium album</i>             |
| CL9694.Contig1_All | 3.74   | 1.77  | -1.08 | <i>Citrus sinensis</i>               |
| CL4776.Contig1_All | 5.88   | 2.8   | -1.07 | <i>Vitis vinifera</i>                |
| CL8162.Contig2_All | 1.55   | 0.74  | -1.07 | <i>Citrus clementina</i>             |
| CL7688.Contig1_All | 7.15   | 3.53  | -1.02 | <i>Vitis vinifera</i>                |

|                     |       |       |       |                         |
|---------------------|-------|-------|-------|-------------------------|
| Unigene6939_All     | 32.08 | 15.84 | -1.02 | <i>Beta vulgaris</i>    |
| Unigene4202_All     | 22.55 | 11.26 | -1.00 | <i>Citrus sinensis</i>  |
| CL7311.Contig3_All  | 1.02  | 3.13  | 1.62  |                         |
| Unigene14008_All    | 0.51  | 7.67  | 3.91  | <i>Vitis vinifera</i>   |
| CL1892.Contig1_All  | 0.2   | 29.67 | 7.21  | <i>Vitis vinifera</i>   |
| CL578.Contig2_All   | 0.01  | 1.93  | 7.59  | <i>Theobroma cacao</i>  |
| CL1892.Contig2_All  | 0.01  | 2.48  | 7.95  | <i>Vitis vinifera</i>   |
| <b>CTR1</b>         |       |       |       |                         |
| CL9787.Contig2_All  | 8.61  | 60.56 | 2.81  | <i>Celosia argentea</i> |
| CL4515.Contig1_All  | 8.91  | 1.03  | -3.11 | <i>Vitis vinifera</i>   |
| CL4515.Contig2_All  | 10.13 | 1.3   | -2.96 | <i>Vitis vinifera</i>   |
| CL6621.Contig2_All  | 22.78 | 11.07 | -1.04 | <i>Vitis vinifera</i>   |
| <b>casein</b>       |       |       |       |                         |
| CL2804.Contig3_All  | 0.01  | 1.24  | 6.95  | <i>Vitis vinifera</i>   |
| CL2804.Contig12_All | 0.31  | 0.01  | -4.95 | <i>Vitis vinifera</i>   |
| CL2804.Contig4_All  | 5.61  | 1.07  | -2.39 | <i>Vitis vinifera</i>   |
| Unigene2822_All     | 4.47  | 1.13  | -1.98 | <i>Morus notabilis</i>  |
| Unigene3220_All     | 14.63 | 6.31  | -1.21 | <i>Theobroma cacao</i>  |
| Unigene15130_All    | 38.83 | 17.38 | -1.16 | <i>Beta vulgaris</i>    |

**Table S19** Expression pattern validation of 7 randomly selected genes in in leaves and roots of *A. canescens* under 100 mM NaCl treatment for 6 h by qRT-PCR.

| Gene ID            | Leaf               |       | Root               |        |
|--------------------|--------------------|-------|--------------------|--------|
|                    | Log2 Ratio (SL/CL) |       | Log2 Ratio (SR/CR) |        |
|                    | RNA-seq            | qPCR  | RNA-seq            | qPCR   |
| CL9208.Contig1_All | 3.60               | 4.82  | -3.17              | -1.76  |
| CL1844.Contig2_All | 5.51               | 4.87  | -6.99              | -4.68  |
| Unigene9476_All    | 6.23               | 7.29  | -7.25              | -4.83  |
| Unigene5013_All    | 14.63              | 9.67  | -11.38             | -10.56 |
| CL3665.Contig1_All | 9.82               | 8.88  | -9.60              | -7.98  |
| CL2142.Contig5_All | -3.04              | -4.13 | 1.89               | 3.64   |
| CL1382.Contig4_All | 7.21               | 7.41  | -14.57             | -8.52  |

**Table S20** Primer sequences used in qRT-PCR

| Primers              | Sequences (5'-3')    |
|----------------------|----------------------|
| CL9208.Contig1_All-F | CCAAGAACTCAATCACTATC |
| CL9208.Contig1_All-R | TCCAAGATTACTACCCATAC |
| CL1844.Contig2_All-F | TCCTAGAGAACACATGATGA |
| CL1844.Contig2_All-R | CGGCGAGAAGTGATTATG   |
| Unigene9476_All-F    | CTAACCGAGACATTAACCA  |
| Unigene9476_All-R    | GTTGAGATACCTTGAAGTTG |

|                      |                          |
|----------------------|--------------------------|
| Unigene5013_All-F    | CGAGCCACTGAGATATTC       |
| Unigene5013_All-R    | AAATGTATGAGACCCTGAG      |
| CL3665.Contig1_All-F | TACACGGATTCAAGGACAA      |
| CL3665.Contig1_All-R | CACTTCCACCACAGACTT       |
| CL2142.Contig5_All-F | GGGCACATACTCTTGGAA       |
| CL2142.Contig5_All-R | CCATCTTAGGCATTCATCATC    |
| CL1382.Contig4_All-F | AGCCTCTAAACTCAACTATG     |
| CL1382.Contig4_All-R | GTAGATCAGCCAAAGTGTA      |
| Actin-F              | AAGAACTACGAGCTACCTGACGG  |
| Actin-R              | GATACCAGAAGATTCCATTCCAAC |

---
